# Supplementary material for: Increased Circulating CD14+ Monocytes in Patients with Psoriatic Arthritis Presenting Impaired Apoptosis Activity
Source: MDPI journal article supplement (doi:10.3390/biomedicines12040775), 2024-04-01
Supplement: s1 [file s1]

**Supplementary Table S1. The primer sequences.**

| gene          | sequence                      |
|---------------|-------------------------------|
| IKBKB forward | CTCTGGAATCTCCTGAAGATTGCTTGTAG |
| IKBKB reverse | ACTCTTCTTGGCTGGCTCAGGTAA      |
| CTSL forward  | GCTGGTGGTTGGCTACGG            |
| CTSL reverse  | CTGGCTGCTGAGGCAATTCC          |
| 18S forward   | GTAACCCGTTGAACCCCAT           |
| 18S ereverse  | CCATCCAATCGGTAGTAGCG          |

**Supplementary Table S2.** The significantly (p-value<0.05) differentially expressed genes between HC and PsA samples.

| Gene Symbol    | p-value(PsA vs. HC) | Ratio(PsA vs. HC) | Fold-Change(PsA vs. HC) |
|----------------|---------------------|-------------------|-------------------------|
| RP11-1250I15.3 | 2.37E-05            | 0.849095          | Down-regulated in PsA   |
| MIR4529        | 7.16E-05            | 0.852082          | Down-regulated in PsA   |
| CTD-2046J7.1   | 8.50E-05            | 1.13452           | Up-regulated in PsA     |
| Metazoa_SRP    | 9.77E-05            | 1.40689           | Up-regulated in PsA     |
| CCM2           | 0.000138632         | 0.652289          | Down-regulated in PsA   |
| RP11-296L22.8  | 0.00016851          | 0.643956          | Down-regulated in PsA   |
| RN7SL32P       | 0.000186652         | 1.04918           | Up-regulated in PsA     |
| MR1            | 0.000190391         | 0.750151          | Down-regulated in PsA   |
| SERPINB8P1     | 0.000197135         | 1.30825           | Up-regulated in PsA     |
| RN7SL336P      | 0.000234964         | 1.02217           | Up-regulated in PsA     |
| AC005943.5     | 0.000252125         | 1.33327           | Up-regulated in PsA     |
| RPSAP19        | 0.000286829         | 0.847361          | Down-regulated in PsA   |
| FGF9           | 0.000287224         | 0.927472          | Down-regulated in PsA   |
| SAP30          | 0.000379988         | 0.728834          | Down-regulated in PsA   |
| AFF2           | 0.000381297         | 1.35121           | Up-regulated in PsA     |
| ZNF408         | 0.00038907          | 1.13381           | Up-regulated in PsA     |
| AP2A2          | 0.000467788         | 0.874084          | Down-regulated in PsA   |
| RP11-187C18.4  | 0.000491202         | 0.846995          | Down-regulated in PsA   |
| AC144836.1     | 0.000499784         | 1.44191           | Up-regulated in PsA     |
| HENMT1         | 0.000524287         | 0.655233          | Down-regulated in PsA   |
| RP11-463O9.2   | 0.000529401         | 1.28918           | Up-regulated in PsA     |
| GAS8           | 0.000553462         | 0.952534          | Down-regulated in PsA   |

|                    |             |                                |
|--------------------|-------------|--------------------------------|
| DMWD               | 0.000590159 | 0.816036 Down-regulated in PsA |
| RP11-25K19.1       | 0.00059694  | 1.21044 Up-regulated in PsA    |
| TRAT1              | 0.000621351 | 1.14239 Up-regulated in PsA    |
| RPL31P13           | 0.000645405 | 1.49662 Up-regulated in PsA    |
| RP13-210D15.1      | 0.000648518 | 0.833492 Down-regulated in PsA |
| RP11-47G4.1        | 0.000649559 | 0.816868 Down-regulated in PsA |
| MIR575             | 0.000660723 | 1.3028 Up-regulated in PsA     |
| SEPT14P8           | 0.000672576 | 0.722071 Down-regulated in PsA |
| FAM53C             | 0.000675196 | 1.14722 Up-regulated in PsA    |
| SLC9A5             | 0.000698574 | 0.892672 Down-regulated in PsA |
| RP11-624L4.1       | 0.000714884 | 1.1813 Up-regulated in PsA     |
| SNRPF              | 0.000739719 | 0.731 Down-regulated in PsA    |
| RAB36              | 0.000752844 | 1.21569 Up-regulated in PsA    |
| ZNRD1-AS1          | 0.00075875  | 0.523453 Down-regulated in PsA |
| GS1-466O4.5        | 0.000769065 | 0.672766 Down-regulated in PsA |
| LOC102467222       | 0.000786555 | 0.848018 Down-regulated in PsA |
| CTA-415G2.2        | 0.000808644 | 0.78895 Down-regulated in PsA  |
| XXbac-BPGBPG34I8.2 | 0.000878839 | 1.45339 Up-regulated in PsA    |
| RN7SL679P          | 0.000935574 | 1.27347 Up-regulated in PsA    |
| RP11-525K10.2      | 0.00093749  | 1.28064 Up-regulated in PsA    |
| NR2E1              | 0.000957441 | 1.14396 Up-regulated in PsA    |
| SEC62-AS1          | 0.000960994 | 1.17614 Up-regulated in PsA    |
| TRPM1              | 0.000961237 | 0.856917 Down-regulated in PsA |
| AC002400.1         | 0.00104132  | 0.774939 Down-regulated in PsA |
| SNORD74            | 0.00107904  | 1.31914 Up-regulated in PsA    |

|               |            |                                |
|---------------|------------|--------------------------------|
| APOBR         | 0.00111514 | 0.770995 Down-regulated in PsA |
| LOC401585     | 0.00112606 | 1.15786 Up-regulated in PsA    |
| RNY1          | 0.00114947 | 1.07862 Up-regulated in PsA    |
| RP11-159D12.8 | 0.00123031 | 0.727212 Down-regulated in PsA |
| ATP13A4       | 0.00125105 | 1.32945 Up-regulated in PsA    |
| MED4          | 0.0012511  | 0.8265 Down-regulated in PsA   |
| RP11-132M7.2  | 0.00127915 | 1.619 Up-regulated in PsA      |
| NMNAT1P4      | 0.0012866  | 0.774346 Down-regulated in PsA |
| HERC2P4       | 0.0012932  | 0.485075 Down-regulated in PsA |
| RAD51AP2      | 0.00129942 | 0.64071 Down-regulated in PsA  |
| HMGB1P47      | 0.00132219 | 1.21196 Up-regulated in PsA    |
| RP11-339N8.1  | 0.00135137 | 0.814475 Down-regulated in PsA |
| GABBR1        | 0.00138556 | 0.765234 Down-regulated in PsA |
| RP11-561N12.6 | 0.0013925  | 0.826986 Down-regulated in PsA |
| PAFAH1B1      | 0.00139348 | 0.81306 Down-regulated in PsA  |
| ZNF354B       | 0.00139818 | 0.772608 Down-regulated in PsA |
| CRPP1         | 0.00142678 | 0.80707 Down-regulated in PsA  |
| EIF4EBP2P1    | 0.00145529 | 1.3221 Up-regulated in PsA     |
| RP11-344N17.3 | 0.0015087  | 0.906627 Down-regulated in PsA |
| MIR526A2      | 0.00152026 | 0.76561 Down-regulated in PsA  |
| RN7SL143P     | 0.00152524 | 1.30417 Up-regulated in PsA    |
| MUS81         | 0.00153708 | 0.843145 Down-regulated in PsA |
| PRKCA-AS1     | 0.00153898 | 1.28617 Up-regulated in PsA    |
| RP5-1142J19.2 | 0.00154122 | 1.37129 Up-regulated in PsA    |
| NCAM2         | 0.00154883 | 0.832106 Down-regulated in PsA |

|               |            |                                |
|---------------|------------|--------------------------------|
| ZNF529-AS1    | 0.00156011 | 0.89338 Down-regulated in PsA  |
| WWC2          | 0.00156703 | 0.77491 Down-regulated in PsA  |
| STARD5        | 0.00157963 | 1.11423 Up-regulated in PsA    |
| E4F1          | 0.00159106 | 1.02397 Up-regulated in PsA    |
| ZNRD1-AS1_2   | 0.00159355 | 0.903781 Down-regulated in PsA |
| RP11-791O21.5 | 0.00161576 | 1.18544 Up-regulated in PsA    |
| LOC100653233  | 0.00162109 | 1.68109 Up-regulated in PsA    |
| RP11-22A3.2   | 0.00165188 | 1.14784 Up-regulated in PsA    |
| RP11-497J7.4  | 0.00171121 | 1.0779 Up-regulated in PsA     |
| CIART         | 0.00171504 | 0.76399 Down-regulated in PsA  |
| HAUS3         | 0.00172091 | 0.713264 Down-regulated in PsA |
| RP11-341D18.2 | 0.00172892 | 1.36082 Up-regulated in PsA    |
| INIP          | 0.00174577 | 0.798018 Down-regulated in PsA |
| SNAR-A12      | 0.00178368 | 1.15196 Up-regulated in PsA    |
| SNAR-A12      | 0.00178368 | 1.15196 Up-regulated in PsA    |
| ODC1          | 0.00178536 | 0.858466 Down-regulated in PsA |
| LOC105375556  | 0.0017926  | 0.819601 Down-regulated in PsA |
| RASD1         | 0.00183187 | 1.1485 Up-regulated in PsA     |
| TOP3B         | 0.00184204 | 0.773297 Down-regulated in PsA |
| MIR4526       | 0.00184753 | 1.23005 Up-regulated in PsA    |
| RP11-594C13.2 | 0.00186159 | 0.736686 Down-regulated in PsA |
| GAPDHP67      | 0.00186321 | 0.856196 Down-regulated in PsA |
| LOC339803     | 0.00188497 | 1.09246 Up-regulated in PsA    |
| PCBD2         | 0.00189097 | 0.719388 Down-regulated in PsA |
| CTD-2008P7.1  | 0.00190436 | 0.829623 Down-regulated in PsA |

|                |            |                                |
|----------------|------------|--------------------------------|
| MIR185         | 0.00190999 | 1.17352 Up-regulated in PsA    |
| SLC25A10       | 0.00191206 | 1.19034 Up-regulated in PsA    |
| RP11-963H4.6   | 0.00192238 | 1.33855 Up-regulated in PsA    |
| AC090957.2     | 0.00195133 | 1.12174 Up-regulated in PsA    |
| RP11-553K8.2   | 0.00196529 | 1.36273 Up-regulated in PsA    |
| RP11-369K16.1  | 0.00197949 | 0.528255 Down-regulated in PsA |
| LOC101927488   | 0.00199046 | 0.88184 Down-regulated in PsA  |
| FOXN3-AS1      | 0.0020203  | 0.730273 Down-regulated in PsA |
| SARS           | 0.00203359 | 0.844009 Down-regulated in PsA |
| TRPV4          | 0.00206361 | 0.650063 Down-regulated in PsA |
| RP11-684B21.1  | 0.00208275 | 1.33798 Up-regulated in PsA    |
| RP11-65E10.1   | 0.0020914  | 1.84909 Up-regulated in PsA    |
| AC006129.1     | 0.00210851 | 1.14746 Up-regulated in PsA    |
| RP11-48B3.3    | 0.0021164  | 1.15804 Up-regulated in PsA    |
| MGA            | 0.00213153 | 0.699174 Down-regulated in PsA |
| OSTC           | 0.00214325 | 0.806597 Down-regulated in PsA |
| RNU6-129P      | 0.00214526 | 1.37997 Up-regulated in PsA    |
| L29074.3       | 0.0021462  | 0.892528 Down-regulated in PsA |
| RP11-1112C15.2 | 0.00216375 | 0.858329 Down-regulated in PsA |
| RP11-485B17.3  | 0.00217026 | 1.16139 Up-regulated in PsA    |
| SFRP5          | 0.00220237 | 1.45525 Up-regulated in PsA    |
| SCRG1          | 0.00220414 | 0.726525 Down-regulated in PsA |
| TRIM6-TRIM34   | 0.00220676 | 0.596184 Down-regulated in PsA |
| COL4A1         | 0.0022109  | 1.34186 Up-regulated in PsA    |
| TBCD           | 0.00223584 | 0.905093 Down-regulated in PsA |

|               |            |                                |
|---------------|------------|--------------------------------|
| RP11-460I13.2 | 0.00223777 | 1.10834 Up-regulated in PsA    |
| ABT1P1        | 0.00224491 | 1.19451 Up-regulated in PsA    |
| ATXN3L        | 0.00224512 | 0.828166 Down-regulated in PsA |
| RP11-341D18.6 | 0.00224619 | 0.911294 Down-regulated in PsA |
| GAS2L1P1      | 0.00225826 | 0.875587 Down-regulated in PsA |
| LOC728673     | 0.00227901 | 1.3815 Up-regulated in PsA     |
| PADI2         | 0.00227902 | 0.505285 Down-regulated in PsA |
| PTCHD3P2      | 0.00231908 | 0.755604 Down-regulated in PsA |
| RP11-417J1.1  | 0.00234347 | 0.885868 Down-regulated in PsA |
| TNPO1P2       | 0.00235542 | 0.652873 Down-regulated in PsA |
| RP11-95G6.1   | 0.00240088 | 1.14529 Up-regulated in PsA    |
| SPANXA2-OT1   | 0.00242616 | 1.17192 Up-regulated in PsA    |
| S100A4        | 0.00245338 | 0.941235 Down-regulated in PsA |
| DPH6          | 0.00246262 | 0.638028 Down-regulated in PsA |
| RP11-295P9.8  | 0.00246832 | 0.903634 Down-regulated in PsA |
| MUTYH         | 0.00246933 | 1.13437 Up-regulated in PsA    |
| TDRD12        | 0.00248528 | 0.73348 Down-regulated in PsA  |
| KRT43P        | 0.00248782 | 1.6596 Up-regulated in PsA     |
| ZEB1-AS1      | 0.00249932 | 1.14993 Up-regulated in PsA    |
| CST1          | 0.00249953 | 0.642655 Down-regulated in PsA |
| SERPINB5      | 0.00250835 | 0.905523 Down-regulated in PsA |
| MIR4473       | 0.00251442 | 0.845493 Down-regulated in PsA |
| DAPK3         | 0.00252426 | 0.677331 Down-regulated in PsA |
| RP11-155I9.1  | 0.00254579 | 0.773374 Down-regulated in PsA |
| PFDN4         | 0.00254612 | 0.716175 Down-regulated in PsA |

|               |            |                                 |
|---------------|------------|---------------------------------|
| RPS26P30      | 0.00254771 | 0.895834 Down-regulated in PsA  |
| AC099850.1    | 0.00258976 | 1.20673 Up-regulated in PsA     |
| LINC01164     | 0.00260623 | 1.46895 Up-regulated in PsA     |
| TPT1P7        | 0.00262174 | 1.13061 Up-regulated in PsA     |
| HSPD1P15      | 0.00262727 | 0.768833 Down-regulated in PsA  |
| SEPT14P24     | 0.00265262 | 0.767683 Down-regulated in PsA  |
| NDUFA9        | 0.00265777 | 0.795713 Down-regulated in PsA  |
| RER1          | 0.0026781  | 0.738385 Down-regulated in PsA  |
| UTS2          | 0.002705   | 0.0756545 Down-regulated in PsA |
| TNFRSF11B     | 0.002738   | 1.17584 Up-regulated in PsA     |
| NUS1P4        | 0.00274304 | 0.819097 Down-regulated in PsA  |
| RP1-229K20.5  | 0.0027863  | 1.28903 Up-regulated in PsA     |
| COA1          | 0.00283402 | 1.21282 Up-regulated in PsA     |
| AC079630.4    | 0.00283408 | 0.899963 Down-regulated in PsA  |
| SCARNA6       | 0.00284538 | 0.964833 Down-regulated in PsA  |
| SCARNA6       | 0.00284538 | 0.964833 Down-regulated in PsA  |
| CTD-2140B24.6 | 0.00286076 | 1.49012 Up-regulated in PsA     |
| LINC-ROR      | 0.00287027 | 0.819535 Down-regulated in PsA  |
| ERV3-1        | 0.00291675 | 0.549128 Down-regulated in PsA  |
| CTD-2073O6.1  | 0.00293916 | 1.14276 Up-regulated in PsA     |
| GDPGP1        | 0.0029466  | 0.64306 Down-regulated in PsA   |
| SETP11        | 0.00300706 | 1.20961 Up-regulated in PsA     |
| RP11-328L11.1 | 0.00300813 | 1.10549 Up-regulated in PsA     |
| FAM216A       | 0.00302729 | 0.761242 Down-regulated in PsA  |
| RN7SKP178     | 0.00303302 | 0.73638 Down-regulated in PsA   |



|               |            |                                |
|---------------|------------|--------------------------------|
| RP11-319G9.4  | 0.00304267 | 1.40115 Up-regulated in PsA    |
| ACTR1A        | 0.00305609 | 0.935546 Down-regulated in PsA |
| RP11-506H20.2 | 0.00306726 | 2.08243 Up-regulated in PsA    |
| MIA           | 0.00307125 | 1.15328 Up-regulated in PsA    |
| GS1-251I9.3   | 0.00308504 | 1.0445 Up-regulated in PsA     |
| RP11-7C6.1    | 0.0031035  | 1.44143 Up-regulated in PsA    |
| RP11-110A12.2 | 0.00315054 | 0.850289 Down-regulated in PsA |
| KRTAP5-2      | 0.00318865 | 1.28341 Up-regulated in PsA    |
| RP11-380D23.1 | 0.00321748 | 1.31556 Up-regulated in PsA    |
| RP11-540B6.3  | 0.00322121 | 0.686639 Down-regulated in PsA |
| LMO4          | 0.00326811 | 0.800057 Down-regulated in PsA |
| AC009120.3    | 0.00329156 | 0.815601 Down-regulated in PsA |
| ZNF37A        | 0.00330081 | 0.711254 Down-regulated in PsA |
| AC012671.2    | 0.00333413 | 1.14702 Up-regulated in PsA    |
| CTC-505O3.3   | 0.00333558 | 0.736855 Down-regulated in PsA |
| DHRS4         | 0.00335418 | 0.697931 Down-regulated in PsA |
| TTC7B         | 0.0033821  | 0.863209 Down-regulated in PsA |
| RP11-498E2.7  | 0.00340056 | 0.909108 Down-regulated in PsA |
| DNAJC5B       | 0.00340484 | 0.636965 Down-regulated in PsA |
| SLC16A1       | 0.00343672 | 0.61593 Down-regulated in PsA  |
| OR10J3        | 0.00347406 | 0.807802 Down-regulated in PsA |
| RP11-656D10.6 | 0.00350096 | 1.21533 Up-regulated in PsA    |
| GSTZ1         | 0.00350855 | 0.858688 Down-regulated in PsA |
| CYP2D6        | 0.00351064 | 1.16694 Up-regulated in PsA    |
| LINC00910     | 0.00352302 | 1.1248 Up-regulated in PsA     |

|               |            |                                |
|---------------|------------|--------------------------------|
| NCALD         | 0.00353343 | 1.21617 Up-regulated in PsA    |
| EMC6          | 0.00354397 | 0.948797 Down-regulated in PsA |
| RN7SL271P     | 0.00355242 | 1.09255 Up-regulated in PsA    |
| RN7SL426P     | 0.0035645  | 1.08685 Up-regulated in PsA    |
| FADD          | 0.00357763 | 0.803587 Down-regulated in PsA |
| PARG          | 0.00362911 | 0.715398 Down-regulated in PsA |
| LRRC1         | 0.0036561  | 0.588371 Down-regulated in PsA |
| LOC283194     | 0.00369756 | 0.743497 Down-regulated in PsA |
| RNASEH1       | 0.00374252 | 1.21212 Up-regulated in PsA    |
| MIR6871       | 0.00375236 | 1.25936 Up-regulated in PsA    |
| OR1L4         | 0.00377919 | 0.729836 Down-regulated in PsA |
| ATP10A        | 0.00383424 | 0.788678 Down-regulated in PsA |
| C5orf66-AS2   | 0.00388041 | 1.33384 Up-regulated in PsA    |
| LOC105755953  | 0.00388824 | 0.733734 Down-regulated in PsA |
| LINC00871     | 0.00389759 | 0.782372 Down-regulated in PsA |
| RP11-257P3.3  | 0.00393682 | 1.48002 Up-regulated in PsA    |
| RP11-74E22.5  | 0.00394805 | 0.671788 Down-regulated in PsA |
| RP11-116O18.3 | 0.00395799 | 1.16359 Up-regulated in PsA    |
| ZNF416        | 0.00399014 | 0.657003 Down-regulated in PsA |
| LOC105378405  | 0.00404002 | 0.806765 Down-regulated in PsA |
| ARL14         | 0.00405189 | 0.785451 Down-regulated in PsA |
| RP11-21B21.4  | 0.00407211 | 0.758047 Down-regulated in PsA |
| WISP2         | 0.00408051 | 1.09555 Up-regulated in PsA    |
| LINC00686     | 0.00410882 | 1.11831 Up-regulated in PsA    |
| CNTD1         | 0.00410961 | 0.599738 Down-regulated in PsA |

|               |            |                                |
|---------------|------------|--------------------------------|
| DCLRE1CP1     | 0.00411346 | 0.675854 Down-regulated in PsA |
| RNASE3        | 0.00412125 | 0.53984 Down-regulated in PsA  |
| RN7SKP124     | 0.00413348 | 1.28027 Up-regulated in PsA    |
| MYO16         | 0.00413565 | 0.858195 Down-regulated in PsA |
| FAM166B       | 0.00414421 | 0.750668 Down-regulated in PsA |
| CECR3         | 0.00415132 | 1.11422 Up-regulated in PsA    |
| RYBP          | 0.00415809 | 0.777539 Down-regulated in PsA |
| AC007274.2    | 0.00417095 | 1.18362 Up-regulated in PsA    |
| SLX4          | 0.00420109 | 0.764217 Down-regulated in PsA |
| RP11-141J13.3 | 0.00421486 | 1.28601 Up-regulated in PsA    |
| CTB-31O20.9   | 0.00423711 | 1.40283 Up-regulated in PsA    |
| RP11-149F8.4  | 0.00423944 | 1.57165 Up-regulated in PsA    |
| RP11-160K17.1 | 0.00425917 | 1.68065 Up-regulated in PsA    |
| MIR4660       | 0.00425926 | 0.702459 Down-regulated in PsA |
| SDR42E1P3     | 0.00426188 | 1.15878 Up-regulated in PsA    |
| FRG2DP        | 0.00426626 | 1.34858 Up-regulated in PsA    |
| RP11-136I14.2 | 0.00428654 | 0.556263 Down-regulated in PsA |
| EIF4EP5       | 0.00429041 | 0.735852 Down-regulated in PsA |
| CTNNBIP1      | 0.00432032 | 0.971721 Down-regulated in PsA |
| MIR4438       | 0.00432458 | 0.794243 Down-regulated in PsA |
| DCAF10        | 0.00432743 | 0.717625 Down-regulated in PsA |
| RPS12         | 0.004377   | 1.04855 Up-regulated in PsA    |
| DNAJC3-AS1    | 0.00440964 | 0.854969 Down-regulated in PsA |
| NCAPG2        | 0.00444087 | 0.694894 Down-regulated in PsA |
| RP1-293L6.1   | 0.00446686 | 0.880661 Down-regulated in PsA |

|                |            |                                |
|----------------|------------|--------------------------------|
| DCDC5          | 0.00447122 | 1.2984 Up-regulated in PsA     |
| CTD-2326C4.1   | 0.00452074 | 0.893583 Down-regulated in PsA |
| KCNMB2-AS1     | 0.0045243  | 1.27477 Up-regulated in PsA    |
| AC072061.2     | 0.00452518 | 1.39015 Up-regulated in PsA    |
| RP3-406A7.7    | 0.00456223 | 1.59587 Up-regulated in PsA    |
| CH507-236L23.2 | 0.00457291 | 0.864762 Down-regulated in PsA |
| RP11-184M15.2  | 0.0046194  | 1.94118 Up-regulated in PsA    |
| ZCCHC7         | 0.00463584 | 0.769934 Down-regulated in PsA |
| RP11-321A17.5  | 0.0046494  | 1.34882 Up-regulated in PsA    |
| SNORD96B       | 0.00466571 | 0.756276 Down-regulated in PsA |
| CCL1           | 0.00468728 | 1.14494 Up-regulated in PsA    |
| C9orf153       | 0.00470691 | 0.688649 Down-regulated in PsA |
| SUDS3P1        | 0.00470879 | 1.22618 Up-regulated in PsA    |
| SPATA1         | 0.00472009 | 0.603738 Down-regulated in PsA |
| RP11-334C17.3  | 0.00472829 | 1.46256 Up-regulated in PsA    |
| RP11-495P10.4  | 0.00473981 | 1.38565 Up-regulated in PsA    |
| HSPD1          | 0.00475232 | 0.726778 Down-regulated in PsA |
| SKIV2L2        | 0.00475541 | 0.759377 Down-regulated in PsA |
| AP000997.3     | 0.00480097 | 1.36401 Up-regulated in PsA    |
| FRAT2          | 0.00481767 | 0.808028 Down-regulated in PsA |
| N4BP1          | 0.00482278 | 0.8006 Down-regulated in PsA   |
| NDUFS5P1       | 0.00482359 | 1.30486 Up-regulated in PsA    |
| CHRM3          | 0.00483858 | 0.842188 Down-regulated in PsA |
| CTC-563A5.2    | 0.00484796 | 1.36219 Up-regulated in PsA    |
| LDLRAP1        | 0.00487077 | 1.07088 Up-regulated in PsA    |

|               |            |                                |
|---------------|------------|--------------------------------|
| RP11-541M12.3 | 0.00488496 | 0.723912 Down-regulated in PsA |
| CRLS1         | 0.00488721 | 0.854033 Down-regulated in PsA |
| AC116050.1    | 0.00492068 | 1.23103 Up-regulated in PsA    |
| RP11-12A20.8  | 0.00494205 | 1.51236 Up-regulated in PsA    |
| CPLX2         | 0.00496012 | 1.16175 Up-regulated in PsA    |
| MTCO1P27      | 0.00497427 | 0.847112 Down-regulated in PsA |
| EFNA2         | 0.00498569 | 1.12998 Up-regulated in PsA    |
| RP11-261C10.1 | 0.00499573 | 1.1722 Up-regulated in PsA     |
| ANGPT2        | 0.00503224 | 0.727173 Down-regulated in PsA |
| EIF3J         | 0.00507148 | 0.721147 Down-regulated in PsA |
| ASB4          | 0.00507336 | 0.652761 Down-regulated in PsA |
| BCS1L         | 0.0050736  | 0.850477 Down-regulated in PsA |
| PRELID3BP8    | 0.0050826  | 1.20175 Up-regulated in PsA    |
| RAB3IP        | 0.00508628 | 0.666303 Down-regulated in PsA |
| PPARG         | 0.0050969  | 0.66373 Down-regulated in PsA  |
| RP11-675F6.4  | 0.00512486 | 1.18438 Up-regulated in PsA    |
| LOC101929380  | 0.00513246 | 1.1531 Up-regulated in PsA     |
| RP3-508I15.9  | 0.00516896 | 1.43841 Up-regulated in PsA    |
| INAFM1        | 0.00518649 | 1.15023 Up-regulated in PsA    |
| LOC101929229  | 0.00518975 | 0.802629 Down-regulated in PsA |
| ACD           | 0.00520317 | 0.957171 Down-regulated in PsA |
| RNU7-127P     | 0.00521904 | 0.946926 Down-regulated in PsA |
| ZNF652        | 0.00522751 | 0.86364 Down-regulated in PsA  |
| VPS8          | 0.00524515 | 0.654255 Down-regulated in PsA |
| RP11-43N22.1  | 0.00525257 | 1.28672 Up-regulated in PsA    |

|               |            |                                |
|---------------|------------|--------------------------------|
| RP11-573G6.8  | 0.00525898 | 1.37994 Up-regulated in PsA    |
| RBPJP7        | 0.00527112 | 0.782031 Down-regulated in PsA |
| RP11-615I2.1  | 0.00529453 | 1.0405 Up-regulated in PsA     |
| Y_RNA         | 0.00529605 | 1.26903 Up-regulated in PsA    |
| RP4-700A9.1   | 0.00530483 | 1.18213 Up-regulated in PsA    |
| CTD-2574D22.4 | 0.00530916 | 0.705094 Down-regulated in PsA |
| DEFB121       | 0.00534962 | 0.723061 Down-regulated in PsA |
| BUD13         | 0.00535294 | 0.80032 Down-regulated in PsA  |
| LOC375196     | 0.00535464 | 0.84649 Down-regulated in PsA  |
| IPO5P1        | 0.00538708 | 1.4073 Up-regulated in PsA     |
| ANP32AP1      | 0.00540384 | 0.725111 Down-regulated in PsA |
| FAM187B2P     | 0.00542706 | 1.45972 Up-regulated in PsA    |
| C3orf36       | 0.00543893 | 1.13802 Up-regulated in PsA    |
| ZNF35         | 0.00545505 | 0.661146 Down-regulated in PsA |
| PRLHR         | 0.0054785  | 0.749183 Down-regulated in PsA |
| CASP4         | 0.00551814 | 0.844179 Down-regulated in PsA |
| VPS41         | 0.00554984 | 0.812942 Down-regulated in PsA |
| PSMA4         | 0.00555456 | 0.792666 Down-regulated in PsA |
| RN7SL478P     | 0.00557039 | 1.17022 Up-regulated in PsA    |
| RP11-295D4.3  | 0.00557781 | 1.27365 Up-regulated in PsA    |
| RP11-770G2.5  | 0.0055896  | 0.923485 Down-regulated in PsA |
| RP11-546K22.1 | 0.00562181 | 0.843081 Down-regulated in PsA |
| AC067969.2    | 0.00562408 | 1.13279 Up-regulated in PsA    |
| RP11-25I15.1  | 0.00573407 | 1.19101 Up-regulated in PsA    |
| SQRDL         | 0.00579198 | 0.93359 Down-regulated in PsA  |

|               |            |                                |
|---------------|------------|--------------------------------|
| USP20         | 0.00579519 | 0.823787 Down-regulated in PsA |
| PAGE2         | 0.00583178 | 0.74928 Down-regulated in PsA  |
| MIR519A2      | 0.00584976 | 1.50033 Up-regulated in PsA    |
| FCHSD1        | 0.00586749 | 0.834644 Down-regulated in PsA |
| RP11-54P19.1  | 0.00590369 | 1.18392 Up-regulated in PsA    |
| RP1-209B5.2   | 0.00591842 | 0.74783 Down-regulated in PsA  |
| OR4X1         | 0.00597582 | 0.813801 Down-regulated in PsA |
| ISM1-AS1      | 0.00603712 | 1.27374 Up-regulated in PsA    |
| MIR500B       | 0.00604299 | 0.925764 Down-regulated in PsA |
| OTUD6B-AS1    | 0.00605562 | 0.664448 Down-regulated in PsA |
| ZHX1-C8orf76  | 0.00605965 | 0.820116 Down-regulated in PsA |
| AC027124.3    | 0.00606797 | 1.22441 Up-regulated in PsA    |
| GALNT11       | 0.00607955 | 0.752496 Down-regulated in PsA |
| RP11-754I20.3 | 0.00608033 | 1.28594 Up-regulated in PsA    |
| RP3-334F4.2   | 0.00608927 | 0.883886 Down-regulated in PsA |
| BPI           | 0.0061322  | 0.560751 Down-regulated in PsA |
| ZNF30         | 0.0061327  | 1.21466 Up-regulated in PsA    |
| RP6-43L17.2   | 0.00615906 | 1.19947 Up-regulated in PsA    |
| KLF2P4        | 0.00621865 | 1.28213 Up-regulated in PsA    |
| RP11-298J23.8 | 0.00627122 | 1.60688 Up-regulated in PsA    |
| LOC102724776  | 0.00628333 | 1.05654 Up-regulated in PsA    |
| MYC           | 0.00637983 | 0.656943 Down-regulated in PsA |
| NFKB1         | 0.00639143 | 0.777525 Down-regulated in PsA |
| ABI1          | 0.00640495 | 0.838628 Down-regulated in PsA |
| MIR15B        | 0.0064208  | 0.632928 Down-regulated in PsA |

|               |            |                                |
|---------------|------------|--------------------------------|
| OR7C2         | 0.00644177 | 0.685007 Down-regulated in PsA |
| RP11-119F19.5 | 0.00644718 | 0.658865 Down-regulated in PsA |
| LGI2          | 0.00646744 | 0.767121 Down-regulated in PsA |
| GPR21         | 0.00646896 | 0.636485 Down-regulated in PsA |
| KB-1073A2.1   | 0.00647753 | 0.76761 Down-regulated in PsA  |
| PSMG3         | 0.00654107 | 1.18457 Up-regulated in PsA    |
| MRPL19        | 0.00655923 | 0.780393 Down-regulated in PsA |
| ATG16L1       | 0.00657083 | 0.796327 Down-regulated in PsA |
| DEDD          | 0.00661664 | 0.885878 Down-regulated in PsA |
| CASP7         | 0.00662208 | 0.918258 Down-regulated in PsA |
| MYDGF         | 0.00663738 | 0.861432 Down-regulated in PsA |
| RP11-247I13.3 | 0.00666912 | 1.15751 Up-regulated in PsA    |
| pRNA          | 0.00668096 | 1.29658 Up-regulated in PsA    |
| AC083843.2    | 0.0066843  | 0.91512 Down-regulated in PsA  |
| COLGALT1      | 0.00668998 | 0.864835 Down-regulated in PsA |
| MRPL3         | 0.00671108 | 0.600815 Down-regulated in PsA |
| AC008264.4    | 0.00672353 | 0.930355 Down-regulated in PsA |
| RP11-109G23.1 | 0.00675894 | 1.1208 Up-regulated in PsA     |
| TMEM191A      | 0.00676967 | 1.70745 Up-regulated in PsA    |
| FAM138A       | 0.00677039 | 1.27234 Up-regulated in PsA    |
| RP11-517A5.5  | 0.00677436 | 0.689605 Down-regulated in PsA |
| RP11-180N14.1 | 0.00678162 | 1.13139 Up-regulated in PsA    |
| RP11-394O4.3  | 0.00678991 | 1.46251 Up-regulated in PsA    |
| ALDOC         | 0.00681328 | 1.23164 Up-regulated in PsA    |
| UBTD2         | 0.0068179  | 0.726476 Down-regulated in PsA |



|               |            |                                |
|---------------|------------|--------------------------------|
| SART1         | 0.00681975 | 0.942469 Down-regulated in PsA |
| RP11-773H22.4 | 0.00684109 | 0.78577 Down-regulated in PsA  |
| RP11-207C16.4 | 0.00688563 | 0.899984 Down-regulated in PsA |
| LOC101929512  | 0.00689218 | 1.11059 Up-regulated in PsA    |
| BORCS5        | 0.00690713 | 1.13577 Up-regulated in PsA    |
| PRR27         | 0.00691333 | 0.780799 Down-regulated in PsA |
| RPSAP11       | 0.00693384 | 0.905925 Down-regulated in PsA |
| RP5-933B4.1   | 0.00700519 | 1.2463 Up-regulated in PsA     |
| LINC00265     | 0.00704248 | 1.11097 Up-regulated in PsA    |
| FAM134A       | 0.00705194 | 0.782394 Down-regulated in PsA |
| RN7SL172P     | 0.00705772 | 1.0535 Up-regulated in PsA     |
| RP11-44L9.2   | 0.00706018 | 0.858814 Down-regulated in PsA |
| RP11-641A6.5  | 0.00706095 | 0.82385 Down-regulated in PsA  |
| KLF17         | 0.00706521 | 1.06563 Up-regulated in PsA    |
| MIR7975       | 0.00707078 | 1.27506 Up-regulated in PsA    |
| IGFL3         | 0.00708221 | 0.880189 Down-regulated in PsA |
| FOXP1-IT1     | 0.00708429 | 0.414445 Down-regulated in PsA |
| FCF1P8        | 0.00709316 | 0.656781 Down-regulated in PsA |
| OXSM          | 0.00712667 | 0.860758 Down-regulated in PsA |
| COX15         | 0.00714549 | 0.720769 Down-regulated in PsA |
| MIR4489       | 0.00715228 | 1.20623 Up-regulated in PsA    |
| PDCL3P3       | 0.00720557 | 1.38562 Up-regulated in PsA    |
| ACAD10        | 0.00722612 | 0.751417 Down-regulated in PsA |
| AP000568.2    | 0.00722918 | 0.855874 Down-regulated in PsA |
| EYS           | 0.00723079 | 0.743966 Down-regulated in PsA |

|               |            |                                |
|---------------|------------|--------------------------------|
| MIR6893       | 0.00725357 | 1.21992 Up-regulated in PsA    |
| SERTAD4       | 0.00726763 | 1.17045 Up-regulated in PsA    |
| DLL4          | 0.00727035 | 0.731345 Down-regulated in PsA |
| SAE1          | 0.00728154 | 0.855829 Down-regulated in PsA |
| LOC644172     | 0.00731909 | 1.45265 Up-regulated in PsA    |
| RP11-492D6.3  | 0.00732515 | 1.426 Up-regulated in PsA      |
| B4GALT3       | 0.00732809 | 0.823075 Down-regulated in PsA |
| RNU6-335P     | 0.00732987 | 1.28174 Up-regulated in PsA    |
| RP11-406O23.2 | 0.00733767 | 1.08122 Up-regulated in PsA    |
| USP17L2       | 0.00733842 | 1.29633 Up-regulated in PsA    |
| UROD          | 0.00734919 | 0.846176 Down-regulated in PsA |
| RPSAP50       | 0.00735321 | 1.07795 Up-regulated in PsA    |
| RCAN3AS       | 0.00736079 | 0.698701 Down-regulated in PsA |
| BEX4          | 0.00738477 | 0.53521 Down-regulated in PsA  |
| RP11-692E14.1 | 0.00745898 | 0.795922 Down-regulated in PsA |
| RP11-775J23.2 | 0.00746231 | 0.754538 Down-regulated in PsA |
| RP11-429K17.1 | 0.00747537 | 1.09805 Up-regulated in PsA    |
| RP11-321E2.8  | 0.00748495 | 1.37775 Up-regulated in PsA    |
| RPS4XP6       | 0.00749694 | 1.13986 Up-regulated in PsA    |
| RP11-803B1.8  | 0.00752195 | 1.31841 Up-regulated in PsA    |
| XPC           | 0.00752382 | 0.751593 Down-regulated in PsA |
| MAPK10        | 0.00752709 | 0.935478 Down-regulated in PsA |
| LOC101929696  | 0.00754991 | 1.42786 Up-regulated in PsA    |
| BIRC2         | 0.00755812 | 0.738397 Down-regulated in PsA |
| NUMB          | 0.00756741 | 0.911542 Down-regulated in PsA |

|               |            |                                |
|---------------|------------|--------------------------------|
| PCDHB2        | 0.00760125 | 1.44554 Up-regulated in PsA    |
| METTL20       | 0.00761144 | 0.736846 Down-regulated in PsA |
| RP11-204M4.1  | 0.00762856 | 1.56924 Up-regulated in PsA    |
| SHROOM1       | 0.00764417 | 0.490798 Down-regulated in PsA |
| PRDX3P4       | 0.00764601 | 0.860692 Down-regulated in PsA |
| AP000697.6    | 0.00765304 | 1.21097 Up-regulated in PsA    |
| TMEM9B        | 0.00767462 | 0.853226 Down-regulated in PsA |
| MIR4461       | 0.00767983 | 1.14185 Up-regulated in PsA    |
| LSG1          | 0.00771706 | 0.768655 Down-regulated in PsA |
| RP11-422J15.1 | 0.00772608 | 1.20003 Up-regulated in PsA    |
| RP11-490G8.1  | 0.00772652 | 1.25113 Up-regulated in PsA    |
| TMEM99        | 0.0077396  | 0.610421 Down-regulated in PsA |
| LOC102723854  | 0.00778705 | 1.09136 Up-regulated in PsA    |
| HSPE1P19      | 0.00779574 | 0.982937 Down-regulated in PsA |
| SARNP         | 0.00782535 | 0.850169 Down-regulated in PsA |
| KPNA7         | 0.00785567 | 0.728853 Down-regulated in PsA |
| LOC101929633  | 0.00789925 | 0.668527 Down-regulated in PsA |
| KANK3         | 0.00791355 | 1.21322 Up-regulated in PsA    |
| RN7SKP133     | 0.00793193 | 1.15502 Up-regulated in PsA    |
| RP11-312J18.5 | 0.00795553 | 1.17548 Up-regulated in PsA    |
| YARS          | 0.00798152 | 0.884192 Down-regulated in PsA |
| RP11-186N15.3 | 0.00799624 | 1.2873 Up-regulated in PsA     |
| CRKL          | 0.00801309 | 0.92916 Down-regulated in PsA  |
| IKBKE         | 0.00803629 | 0.800358 Down-regulated in PsA |
| MIR6774       | 0.00805456 | 1.11864 Up-regulated in PsA    |

|               |            |                                |
|---------------|------------|--------------------------------|
| RP5-916L7.2   | 0.00809178 | 1.32248 Up-regulated in PsA    |
| PRRX2-AS1     | 0.00813795 | 1.14267 Up-regulated in PsA    |
| MNX1-AS2      | 0.00816562 | 1.22051 Up-regulated in PsA    |
| Metazoa_SRP   | 0.00818901 | 0.949015 Down-regulated in PsA |
| NIFK          | 0.00819847 | 0.839695 Down-regulated in PsA |
| RP11-216P16.6 | 0.00824565 | 1.48255 Up-regulated in PsA    |
| MTF1          | 0.00825209 | 0.80284 Down-regulated in PsA  |
| FABP3         | 0.00826929 | 1.28844 Up-regulated in PsA    |
| SMCR2         | 0.00827252 | 1.52065 Up-regulated in PsA    |
| RP5-981O7.2   | 0.00831552 | 0.712022 Down-regulated in PsA |
| RAX           | 0.00832233 | 1.25184 Up-regulated in PsA    |
| TRIM36        | 0.0083521  | 0.822854 Down-regulated in PsA |
| CCDC107       | 0.00835467 | 0.798112 Down-regulated in PsA |
| VPS11         | 0.00837109 | 1.20605 Up-regulated in PsA    |
| OR6N2         | 0.00837431 | 0.697704 Down-regulated in PsA |
| DNHD1         | 0.0083943  | 0.80938 Down-regulated in PsA  |
| XRCC2         | 0.00840349 | 0.645581 Down-regulated in PsA |
| AXIN2         | 0.00841021 | 0.689425 Down-regulated in PsA |
| PCDH18        | 0.00842244 | 1.13039 Up-regulated in PsA    |
| RNU7-190P     | 0.00842417 | 0.594434 Down-regulated in PsA |
| LOC101928569  | 0.00844103 | 1.26387 Up-regulated in PsA    |
| RP11-493P1.2  | 0.00845137 | 0.693564 Down-regulated in PsA |
| ZIC5          | 0.00847535 | 0.831505 Down-regulated in PsA |
| ACBD3         | 0.00847997 | 0.829023 Down-regulated in PsA |
| RP11-357N13.6 | 0.00849045 | 0.650666 Down-regulated in PsA |

|                |            |                                |
|----------------|------------|--------------------------------|
| SEMG1          | 0.00851587 | 0.6701 Down-regulated in PsA   |
| C2orf78        | 0.00851785 | 1.21973 Up-regulated in PsA    |
| AC005009.2     | 0.00852862 | 2.27665 Up-regulated in PsA    |
| SLC29A2        | 0.00853014 | 0.892759 Down-regulated in PsA |
| CTC-459F4.6    | 0.00855946 | 0.698069 Down-regulated in PsA |
| TMEM44-AS1     | 0.00856919 | 0.581583 Down-regulated in PsA |
| BRCC3          | 0.00862232 | 0.770874 Down-regulated in PsA |
| LOC101929125   | 0.0086246  | 0.837294 Down-regulated in PsA |
| KRT8P8         | 0.00871791 | 1.40995 Up-regulated in PsA    |
| ABCA17P        | 0.00872431 | 1.07881 Up-regulated in PsA    |
| DOCK9-AS2      | 0.008757   | 1.46846 Up-regulated in PsA    |
| AF240627.2     | 0.00876563 | 1.29193 Up-regulated in PsA    |
| C18orf54       | 0.00879043 | 0.556558 Down-regulated in PsA |
| PDK4           | 0.0087989  | 0.73095 Down-regulated in PsA  |
| LYPD5          | 0.0088082  | 0.869058 Down-regulated in PsA |
| DDX53          | 0.00884087 | 1.1882 Up-regulated in PsA     |
| CTC-340I23.2   | 0.00884451 | 0.84293 Down-regulated in PsA  |
| AC145343.2     | 0.0088662  | 1.44383 Up-regulated in PsA    |
| MECOM          | 0.00889583 | 0.74019 Down-regulated in PsA  |
| ST20           | 0.00890773 | 0.971548 Down-regulated in PsA |
| SMIM10         | 0.00891778 | 1.36499 Up-regulated in PsA    |
| CTD-2616J11.15 | 0.00892559 | 1.08837 Up-regulated in PsA    |
| OR8D1          | 0.00894648 | 1.19634 Up-regulated in PsA    |
| RP11-282K24.3  | 0.0089578  | 0.753175 Down-regulated in PsA |
| SMIM23         | 0.0089814  | 0.84615 Down-regulated in PsA  |

|               |            |                                |
|---------------|------------|--------------------------------|
| FAR1P1        | 0.00898805 | 0.72127 Down-regulated in PsA  |
| LGI3          | 0.00899095 | 0.786929 Down-regulated in PsA |
| SNORD113-8    | 0.00900266 | 1.29444 Up-regulated in PsA    |
| DLX6-AS1      | 0.00901969 | 0.819304 Down-regulated in PsA |
| SLC6A12       | 0.00903048 | 0.731641 Down-regulated in PsA |
| RP11-83M16.1  | 0.00903319 | 1.2172 Up-regulated in PsA     |
| TMEM208       | 0.00903917 | 1.09598 Up-regulated in PsA    |
| HMGB3P7       | 0.00905887 | 0.91116 Down-regulated in PsA  |
| C10orf71      | 0.00907341 | 0.742987 Down-regulated in PsA |
| RP11-295P22.3 | 0.00908761 | 0.687144 Down-regulated in PsA |
| ZNF496        | 0.00911131 | 1.22176 Up-regulated in PsA    |
| RN7SL828P     | 0.00913245 | 1.19489 Up-regulated in PsA    |
| AC005752.10   | 0.00915632 | 1.26237 Up-regulated in PsA    |
| MIR2681       | 0.00920157 | 1.21229 Up-regulated in PsA    |
| RP11-16E18.1  | 0.00922775 | 0.88877 Down-regulated in PsA  |
| IGFBP7-AS1    | 0.00922918 | 1.28132 Up-regulated in PsA    |
| SMAD1-AS1     | 0.00924457 | 0.976898 Down-regulated in PsA |
| Metazoa_SRP   | 0.00925345 | 0.871311 Down-regulated in PsA |
| KIF15         | 0.00926003 | 0.87695 Down-regulated in PsA  |
| RP11-16C1.1   | 0.00926756 | 1.47627 Up-regulated in PsA    |
| ACIN1         | 0.00927566 | 0.77516 Down-regulated in PsA  |
| AC006296.2    | 0.00929904 | 1.19304 Up-regulated in PsA    |
| GLYATL2       | 0.00935543 | 0.781997 Down-regulated in PsA |
| HNRNPDL3      | 0.00935725 | 1.32717 Up-regulated in PsA    |
| MIR3646       | 0.00937937 | 1.33406 Up-regulated in PsA    |

|               |            |                                |
|---------------|------------|--------------------------------|
| AP001046.6    | 0.00939043 | 1.33851 Up-regulated in PsA    |
| C22orf24      | 0.00939417 | 0.676629 Down-regulated in PsA |
| SLC25A6P6     | 0.00939544 | 0.78383 Down-regulated in PsA  |
| FAM150B       | 0.00941495 | 0.739387 Down-regulated in PsA |
| TSR3          | 0.00943432 | 0.902891 Down-regulated in PsA |
| STK39         | 0.00943745 | 0.594441 Down-regulated in PsA |
| CTC-281M20.4  | 0.009438   | 1.17609 Up-regulated in PsA    |
| RP11-43P8.2   | 0.00947182 | 0.881286 Down-regulated in PsA |
| AC092421.1    | 0.00949169 | 1.68645 Up-regulated in PsA    |
| RP4-745E8.2   | 0.00951487 | 1.48782 Up-regulated in PsA    |
| NHLH2         | 0.00953972 | 0.757468 Down-regulated in PsA |
| RP11-568G11.5 | 0.00954288 | 0.857045 Down-regulated in PsA |
| RP1-34L19.1   | 0.00954594 | 1.30378 Up-regulated in PsA    |
| AE000658.31   | 0.00957309 | 0.82308 Down-regulated in PsA  |
| HAUS7         | 0.00958654 | 0.824989 Down-regulated in PsA |
| PRKAG3        | 0.00960968 | 0.890706 Down-regulated in PsA |
| RP11-114G22.1 | 0.00961663 | 1.22614 Up-regulated in PsA    |
| CTD-2538A21.1 | 0.0096271  | 0.79452 Down-regulated in PsA  |
| RP11-629F19.1 | 0.00962845 | 0.786488 Down-regulated in PsA |
| LINC01033     | 0.00965541 | 0.794782 Down-regulated in PsA |
| CTD-2090I13.1 | 0.00965686 | 1.6754 Up-regulated in PsA     |
| IGSF11-AS1    | 0.00965974 | 0.642819 Down-regulated in PsA |
| RP11-311H10.7 | 0.00966359 | 1.20454 Up-regulated in PsA    |
| NR2F2         | 0.00966819 | 1.22716 Up-regulated in PsA    |
| NUDCD1        | 0.00968296 | 0.595954 Down-regulated in PsA |

|               |            |                                |
|---------------|------------|--------------------------------|
| RNF216        | 0.00971042 | 0.923692 Down-regulated in PsA |
| SPANXN4       | 0.00973959 | 1.07312 Up-regulated in PsA    |
| LOC101927811  | 0.00975689 | 1.5596 Up-regulated in PsA     |
| TTC23L        | 0.00977304 | 1.25988 Up-regulated in PsA    |
| CCDC17        | 0.0097979  | 1.15367 Up-regulated in PsA    |
| LOC100144595  | 0.00980863 | 0.862234 Down-regulated in PsA |
| MTHFD2        | 0.00981298 | 0.861188 Down-regulated in PsA |
| PRR21         | 0.0098216  | 1.15407 Up-regulated in PsA    |
| MIR3976HG     | 0.00982674 | 1.13995 Up-regulated in PsA    |
| FLI1          | 0.00984317 | 0.858482 Down-regulated in PsA |
| PKMP1         | 0.00984694 | 0.871688 Down-regulated in PsA |
| RP11-11C20.3  | 0.00989917 | 0.895632 Down-regulated in PsA |
| RP11-98G13.1  | 0.00995922 | 0.790235 Down-regulated in PsA |
| Y_RNA         | 0.00997178 | 0.83594 Down-regulated in PsA  |
| RP11-995C19.2 | 0.00997399 | 0.876103 Down-regulated in PsA |
| AMIGO2        | 0.0100595  | 0.788473 Down-regulated in PsA |
| VCX2          | 0.0100732  | 1.11516 Up-regulated in PsA    |
| RP11-702C7.1  | 0.0100806  | 1.30284 Up-regulated in PsA    |
| RP11-411A19.5 | 0.0100923  | 1.67013 Up-regulated in PsA    |
| SNX27         | 0.0100982  | 0.845899 Down-regulated in PsA |
| RP11-312J18.3 | 0.0101408  | 0.915577 Down-regulated in PsA |
| AC109309.4    | 0.0101569  | 0.874609 Down-regulated in PsA |
| HLA-DQB2      | 0.0101603  | 1.18119 Up-regulated in PsA    |
| SAP30L        | 0.010162   | 0.738738 Down-regulated in PsA |
| ACER2         | 0.0101696  | 1.28452 Up-regulated in PsA    |



|               |           |                                |
|---------------|-----------|--------------------------------|
| RP11-638L3.4  | 0.0102109 | 1.11539 Up-regulated in PsA    |
| MIR1269B      | 0.0102144 | 1.1584 Up-regulated in PsA     |
| ASZ1          | 0.010224  | 0.832705 Down-regulated in PsA |
| MIR7-3        | 0.0102619 | 0.760302 Down-regulated in PsA |
| SRXN1         | 0.0103012 | 1.06558 Up-regulated in PsA    |
| RP11-420H19.3 | 0.01035   | 0.861672 Down-regulated in PsA |
| WBSCR16       | 0.0103999 | 0.875353 Down-regulated in PsA |
| DOCK7         | 0.0104919 | 0.495701 Down-regulated in PsA |
| RP11-193M21.1 | 0.0105124 | 1.05015 Up-regulated in PsA    |
| MIR8063       | 0.0105201 | 1.40823 Up-regulated in PsA    |
| NXT1          | 0.0105532 | 1.31902 Up-regulated in PsA    |
| LINC01082     | 0.0105535 | 0.80162 Down-regulated in PsA  |
| TRIP12        | 0.0105685 | 0.77102 Down-regulated in PsA  |
| RUFY1         | 0.0105781 | 0.72674 Down-regulated in PsA  |
| RP11-554D14.7 | 0.0105925 | 1.51588 Up-regulated in PsA    |
| UTP14A        | 0.0106136 | 0.743574 Down-regulated in PsA |
| LINC01476     | 0.0106226 | 0.796715 Down-regulated in PsA |
| FKRP          | 0.0106493 | 1.23999 Up-regulated in PsA    |
| CDK5RAP3      | 0.0106616 | 0.824084 Down-regulated in PsA |
| RNY1P8        | 0.0106707 | 1.39006 Up-regulated in PsA    |
| RP11-927P21.2 | 0.0106773 | 1.64683 Up-regulated in PsA    |
| RP11-267M23.7 | 0.0107055 | 1.2848 Up-regulated in PsA     |
| CCNJL         | 0.0107332 | 1.10393 Up-regulated in PsA    |
| SLC52A2       | 0.0107502 | 0.885048 Down-regulated in PsA |
| CTSD          | 0.0107855 | 0.919197 Down-regulated in PsA |

|               |           |                                |
|---------------|-----------|--------------------------------|
| PDLIM3        | 0.0108171 | 0.888745 Down-regulated in PsA |
| ITIH2         | 0.0108217 | 1.47037 Up-regulated in PsA    |
| ELP6          | 0.0108403 | 0.610795 Down-regulated in PsA |
| RP11-529P9.1  | 0.0108737 | 1.43873 Up-regulated in PsA    |
| RP11-257O5.2  | 0.0108916 | 0.725269 Down-regulated in PsA |
| CGN           | 0.0109701 | 0.795923 Down-regulated in PsA |
| C1orf54       | 0.0109784 | 0.68481 Down-regulated in PsA  |
| CCDC149       | 0.0109908 | 0.813711 Down-regulated in PsA |
| AREL1         | 0.0109961 | 0.919822 Down-regulated in PsA |
| RP11-711M9.2  | 0.0110471 | 1.09394 Up-regulated in PsA    |
| RIMKLB2       | 0.0110744 | 0.938779 Down-regulated in PsA |
| PRR25         | 0.0111175 | 0.924818 Down-regulated in PsA |
| RN7SL262P     | 0.0111226 | 1.06217 Up-regulated in PsA    |
| NME1P1        | 0.0111288 | 1.18641 Up-regulated in PsA    |
| RPP40         | 0.0111359 | 0.700754 Down-regulated in PsA |
| RP11-239C9.1  | 0.0111379 | 0.844854 Down-regulated in PsA |
| KCNMA1-AS1    | 0.0111821 | 1.26179 Up-regulated in PsA    |
| RP11-424N24.2 | 0.0112187 | 1.2649 Up-regulated in PsA     |
| RP11-34P13.7  | 0.0112405 | 0.778477 Down-regulated in PsA |
| NMRK1         | 0.0112448 | 0.569071 Down-regulated in PsA |
| CHMP5         | 0.0112546 | 0.765145 Down-regulated in PsA |
| LOC101927394  | 0.0112672 | 1.39075 Up-regulated in PsA    |
| SYT2          | 0.0112764 | 0.8176 Down-regulated in PsA   |
| PIP4K2A       | 0.0112977 | 0.778446 Down-regulated in PsA |
| ATP6V1H       | 0.0113081 | 0.730852 Down-regulated in PsA |

|               |           |                                |
|---------------|-----------|--------------------------------|
| RP4-673D20.6  | 0.0113349 | 0.536008 Down-regulated in PsA |
| C16orf86      | 0.0113438 | 1.08971 Up-regulated in PsA    |
| SNX10         | 0.011368  | 0.828148 Down-regulated in PsA |
| LAPTM4BP2     | 0.0113686 | 0.793956 Down-regulated in PsA |
| ERP44         | 0.0113704 | 0.865122 Down-regulated in PsA |
| RP11-794P6.6  | 0.0113744 | 0.784718 Down-regulated in PsA |
| RP11-302K17.4 | 0.0113753 | 0.95065 Down-regulated in PsA  |
| RP11-417J1.5  | 0.011394  | 1.40301 Up-regulated in PsA    |
| RP11-151H2.1  | 0.0114207 | 1.31578 Up-regulated in PsA    |
| RP11-323J4.1  | 0.011445  | 1.11927 Up-regulated in PsA    |
| IFNWP2        | 0.0114519 | 0.687017 Down-regulated in PsA |
| LINC01122     | 0.0114828 | 1.22302 Up-regulated in PsA    |
| AC004945.1    | 0.0114928 | 0.827606 Down-regulated in PsA |
| WDFY3-AS1     | 0.011532  | 0.84985 Down-regulated in PsA  |
| SORD2P        | 0.0115894 | 0.760022 Down-regulated in PsA |
| RP11-294J22.5 | 0.011626  | 0.936774 Down-regulated in PsA |
| RP11-298D21.3 | 0.0116517 | 1.40166 Up-regulated in PsA    |
| CCNYL2        | 0.0116539 | 1.33503 Up-regulated in PsA    |
| CHORDC1       | 0.0116703 | 0.642811 Down-regulated in PsA |
| SIAH1         | 0.0117034 | 1.11325 Up-regulated in PsA    |
| CASC17        | 0.0117276 | 1.2345 Up-regulated in PsA     |
| AC068580.5    | 0.0117303 | 1.1352 Up-regulated in PsA     |
| OR10T2        | 0.0117352 | 0.815462 Down-regulated in PsA |
| RP11-533K11.1 | 0.0117732 | 0.882726 Down-regulated in PsA |
| RP4-583P15.10 | 0.0117764 | 0.858618 Down-regulated in PsA |

|               |           |                                |
|---------------|-----------|--------------------------------|
| RP11-358B23.1 | 0.0118105 | 1.21078 Up-regulated in PsA    |
| UBA6-AS1      | 0.0118136 | 0.842007 Down-regulated in PsA |
| LOC101928896  | 0.0118297 | 1.11949 Up-regulated in PsA    |
| MTND6P12      | 0.011833  | 1.32419 Up-regulated in PsA    |
| RP11-539I5.1  | 0.0118972 | 1.14016 Up-regulated in PsA    |
| GHR           | 0.0119682 | 0.85937 Down-regulated in PsA  |
| CHRD1         | 0.0119719 | 0.577259 Down-regulated in PsA |
| SURF4         | 0.0119725 | 0.832016 Down-regulated in PsA |
| AIPL1         | 0.0119901 | 0.760607 Down-regulated in PsA |
| TGDS          | 0.012012  | 0.580223 Down-regulated in PsA |
| CANX          | 0.012033  | 0.927668 Down-regulated in PsA |
| RN7SL221P     | 0.0120558 | 1.22277 Up-regulated in PsA    |
| VN1R36P       | 0.0120986 | 0.893242 Down-regulated in PsA |
| ELL2P2        | 0.0121377 | 1.23209 Up-regulated in PsA    |
| RP4-797C5.2   | 0.0121406 | 1.48382 Up-regulated in PsA    |
| RP11-659P15.1 | 0.0121608 | 1.25358 Up-regulated in PsA    |
| DNAJC19P6     | 0.0121766 | 0.716618 Down-regulated in PsA |
| RP11-322L17.1 | 0.0121815 | 1.07536 Up-regulated in PsA    |
| MEIKIN        | 0.0121817 | 0.579636 Down-regulated in PsA |
| MIR499A       | 0.012218  | 1.11459 Up-regulated in PsA    |
| PRRG1         | 0.0122315 | 0.676605 Down-regulated in PsA |
| SERBP1P4      | 0.0122457 | 1.32829 Up-regulated in PsA    |
| SNORD8        | 0.0122791 | 1.13509 Up-regulated in PsA    |
| RP11-347H15.2 | 0.0123047 | 0.676524 Down-regulated in PsA |
| ZAR1L         | 0.0123119 | 1.08784 Up-regulated in PsA    |

|               |           |                                |
|---------------|-----------|--------------------------------|
| MYL6BP1       | 0.0123158 | 0.822375 Down-regulated in PsA |
| GDF7          | 0.012339  | 0.788093 Down-regulated in PsA |
| RP11-351M8.2  | 0.0123396 | 1.26322 Up-regulated in PsA    |
| GBAT2         | 0.0123479 | 1.34782 Up-regulated in PsA    |
| PCNA-AS1      | 0.0123647 | 0.769849 Down-regulated in PsA |
| CLEC2D        | 0.0123736 | 0.873309 Down-regulated in PsA |
| RP11-416A14.1 | 0.0123784 | 0.692192 Down-regulated in PsA |
| AC005822.1    | 0.0123923 | 0.826062 Down-regulated in PsA |
| RP11-361M10.4 | 0.0123975 | 0.846087 Down-regulated in PsA |
| ASCL5         | 0.0123993 | 1.27308 Up-regulated in PsA    |
| RP11-95L3.2   | 0.0124005 | 1.24258 Up-regulated in PsA    |
| Y_RNA         | 0.0124189 | 0.937966 Down-regulated in PsA |
| PCNAP3        | 0.0124359 | 0.688647 Down-regulated in PsA |
| CTC-525D6.2   | 0.0124367 | 1.34938 Up-regulated in PsA    |
| PRDM15        | 0.0124423 | 0.841196 Down-regulated in PsA |
| DDAH1         | 0.0124825 | 0.753633 Down-regulated in PsA |
| RP11-321E2.7  | 0.0124918 | 1.33435 Up-regulated in PsA    |
| DNAI1         | 0.0124926 | 1.16604 Up-regulated in PsA    |
| LSAMP-AS1     | 0.0124938 | 1.0681 Up-regulated in PsA     |
| FHAD1         | 0.0124941 | 0.771479 Down-regulated in PsA |
| PPFIA1        | 0.0125023 | 0.698509 Down-regulated in PsA |
| RN7SKP12      | 0.0125559 | 0.769873 Down-regulated in PsA |
| CTC-422A18.2  | 0.0125915 | 1.2107 Up-regulated in PsA     |
| SNTG1         | 0.0125916 | 0.683986 Down-regulated in PsA |
| AC208162.1    | 0.0126081 | 1.16145 Up-regulated in PsA    |

|                |           |                                |
|----------------|-----------|--------------------------------|
| MORF4L1P7      | 0.0126197 | 0.793712 Down-regulated in PsA |
| BST1           | 0.0126214 | 0.783351 Down-regulated in PsA |
| SUSD1          | 0.0126243 | 0.719639 Down-regulated in PsA |
| RP11-400N13.3  | 0.0126294 | 0.874071 Down-regulated in PsA |
| CTD-2128A3.2   | 0.0126394 | 1.83614 Up-regulated in PsA    |
| RP11-1084A12.2 | 0.0126513 | 0.80328 Down-regulated in PsA  |
| IFIH1          | 0.0126615 | 0.717218 Down-regulated in PsA |
| MAMDC4         | 0.0126621 | 0.806503 Down-regulated in PsA |
| TAF6L          | 0.0127    | 1.08999 Up-regulated in PsA    |
| ENOX1-AS2      | 0.0127124 | 1.30147 Up-regulated in PsA    |
| GS1-124K5.9    | 0.01273   | 1.26836 Up-regulated in PsA    |
| DMTN           | 0.0127477 | 1.05981 Up-regulated in PsA    |
| RN7SL52P       | 0.0127489 | 1.48746 Up-regulated in PsA    |
| RPL21P38       | 0.0127501 | 1.16386 Up-regulated in PsA    |
| KNTC1          | 0.0127569 | 0.75763 Down-regulated in PsA  |
| RP11-452C13.1  | 0.0127638 | 0.76602 Down-regulated in PsA  |
| LOC100996583   | 0.012797  | 1.61248 Up-regulated in PsA    |
| CTD-2184C24.2  | 0.0128007 | 0.605893 Down-regulated in PsA |
| PLCG2          | 0.0128606 | 0.803241 Down-regulated in PsA |
| OR2T8          | 0.012905  | 1.37211 Up-regulated in PsA    |
| RGS5           | 0.0129053 | 0.622202 Down-regulated in PsA |
| AC007386.4     | 0.0129282 | 0.463875 Down-regulated in PsA |
| ADAMTS13       | 0.0129284 | 0.807631 Down-regulated in PsA |
| TMEM204        | 0.0129308 | 1.19281 Up-regulated in PsA    |
| CTBP2P6        | 0.0129352 | 0.949251 Down-regulated in PsA |

|               |           |                                |
|---------------|-----------|--------------------------------|
| LOC284395     | 0.0129574 | 1.42025 Up-regulated in PsA    |
| RABEPK        | 0.0129635 | 0.920463 Down-regulated in PsA |
| RALGAPB       | 0.0130014 | 0.765285 Down-regulated in PsA |
| RP11-797E24.1 | 0.0130467 | 0.808183 Down-regulated in PsA |
| DR1           | 0.0130508 | 0.788779 Down-regulated in PsA |
| TXNDC12       | 0.0130822 | 0.821215 Down-regulated in PsA |
| RP11-148O21.6 | 0.0131007 | 1.44312 Up-regulated in PsA    |
| SSTR1         | 0.0131062 | 1.22458 Up-regulated in PsA    |
| TCP1P1        | 0.0131079 | 0.87618 Down-regulated in PsA  |
| LINC01349     | 0.0131169 | 0.809369 Down-regulated in PsA |
| RP11-478B11.2 | 0.01312   | 0.691119 Down-regulated in PsA |
| RP3-333H23.9  | 0.0131413 | 0.902614 Down-regulated in PsA |
| FAM84B        | 0.0131416 | 0.785875 Down-regulated in PsA |
| LINC01479     | 0.0131421 | 1.46249 Up-regulated in PsA    |
| CHCHD4P5      | 0.0131917 | 1.29088 Up-regulated in PsA    |
| LOC101929058  | 0.013221  | 1.1447 Up-regulated in PsA     |
| HIST2H2AB     | 0.013225  | 1.20024 Up-regulated in PsA    |
| AC012462.3    | 0.0132342 | 1.32378 Up-regulated in PsA    |
| SGOL1P1       | 0.0132687 | 1.31422 Up-regulated in PsA    |
| SLFN5         | 0.0132981 | 0.611826 Down-regulated in PsA |
| RP11-279F6.2  | 0.0132991 | 1.39376 Up-regulated in PsA    |
| INMT          | 0.0133092 | 0.906965 Down-regulated in PsA |
| LOC399715     | 0.0133405 | 1.135 Up-regulated in PsA      |
| RP11-329B9.4  | 0.0133424 | 0.913492 Down-regulated in PsA |
| RP11-26L20.3  | 0.0133723 | 1.57032 Up-regulated in PsA    |

|                |           |                                |
|----------------|-----------|--------------------------------|
| GS1-309P15.3   | 0.0133919 | 0.801215 Down-regulated in PsA |
| RN7SKP98       | 0.0134027 | 1.26204 Up-regulated in PsA    |
| RP11-211N8.6   | 0.0134209 | 1.29277 Up-regulated in PsA    |
| AC004066.3     | 0.0134472 | 1.24735 Up-regulated in PsA    |
| SMUG1P1        | 0.0134596 | 0.812584 Down-regulated in PsA |
| CYCSP20        | 0.013572  | 1.12658 Up-regulated in PsA    |
| RP11-1299A16.3 | 0.0135811 | 1.43898 Up-regulated in PsA    |
| DNMBP-AS1      | 0.0136088 | 1.80334 Up-regulated in PsA    |
| LOC100507642   | 0.0136834 | 0.595464 Down-regulated in PsA |
| SAG            | 0.0136855 | 0.750934 Down-regulated in PsA |
| HECTD2         | 0.0136997 | 0.712233 Down-regulated in PsA |
| RP11-108K3.4   | 0.0137251 | 1.39604 Up-regulated in PsA    |
| NOTCH4         | 0.0137554 | 0.734452 Down-regulated in PsA |
| PLK1           | 0.0137783 | 1.26801 Up-regulated in PsA    |
| AC074338.5     | 0.0138043 | 1.20361 Up-regulated in PsA    |
| RN7SKP212      | 0.0138087 | 1.762 Up-regulated in PsA      |
| CARNS1         | 0.0138136 | 1.2853 Up-regulated in PsA     |
| Y_RNA          | 0.0138344 | 1.27806 Up-regulated in PsA    |
| TAF12          | 0.0138451 | 0.677301 Down-regulated in PsA |
| VPS39          | 0.0138483 | 0.91078 Down-regulated in PsA  |
| ARL11          | 0.01385   | 0.616554 Down-regulated in PsA |
| PALB2          | 0.0138556 | 0.814836 Down-regulated in PsA |
| GOT2           | 0.0138856 | 0.909648 Down-regulated in PsA |
| LINC01481      | 0.0139039 | 1.21551 Up-regulated in PsA    |
| RP1-206D15.5   | 0.0139278 | 1.18233 Up-regulated in PsA    |



|               |           |                                |
|---------------|-----------|--------------------------------|
| AL109767.1    | 0.013937  | 1.46454 Up-regulated in PsA    |
| Y_RNA         | 0.0140061 | 0.850631 Down-regulated in PsA |
| FAM210A       | 0.0140126 | 0.855966 Down-regulated in PsA |
| AKAP3         | 0.0140201 | 1.35459 Up-regulated in PsA    |
| GSTA7P        | 0.0140252 | 1.30586 Up-regulated in PsA    |
| PQLC2L        | 0.0140567 | 0.552147 Down-regulated in PsA |
| GYG1          | 0.0140657 | 0.868128 Down-regulated in PsA |
| AC064834.1    | 0.0140684 | 0.862114 Down-regulated in PsA |
| TBC1D3B       | 0.0140692 | 0.846446 Down-regulated in PsA |
| FENDRR        | 0.0140734 | 0.886847 Down-regulated in PsA |
| AC007272.3    | 0.0140739 | 0.814527 Down-regulated in PsA |
| RP11-81A1.4   | 0.0140793 | 0.71674 Down-regulated in PsA  |
| IFITM8P       | 0.0140798 | 1.41827 Up-regulated in PsA    |
| SLIRP         | 0.0141255 | 0.920526 Down-regulated in PsA |
| SPEN          | 0.0141432 | 0.889605 Down-regulated in PsA |
| CETN3         | 0.0141563 | 0.703829 Down-regulated in PsA |
| USP17L19      | 0.0141666 | 0.672169 Down-regulated in PsA |
| ZNF793        | 0.0141764 | 0.869854 Down-regulated in PsA |
| RPL23AP39     | 0.0142154 | 1.11581 Up-regulated in PsA    |
| LETM1P2       | 0.0142526 | 1.19443 Up-regulated in PsA    |
| FAM3D         | 0.0142652 | 0.869692 Down-regulated in PsA |
| RP11-177G23.2 | 0.0143076 | 0.928587 Down-regulated in PsA |
| NPC2          | 0.0143444 | 0.900601 Down-regulated in PsA |
| OR8S1         | 0.0143587 | 0.614034 Down-regulated in PsA |
| PRKX          | 0.0143914 | 0.726588 Down-regulated in PsA |

|                |           |                                |
|----------------|-----------|--------------------------------|
| MIR34A         | 0.0144172 | 1.19853 Up-regulated in PsA    |
| RP11-241N4.2   | 0.0144327 | 1.13512 Up-regulated in PsA    |
| DBF4B          | 0.0144455 | 0.745283 Down-regulated in PsA |
| RP11-419M24.1  | 0.0144679 | 1.40696 Up-regulated in PsA    |
| RN7SKP242      | 0.0145111 | 1.28875 Up-regulated in PsA    |
| EEF1DP4        | 0.0145139 | 1.31112 Up-regulated in PsA    |
| RP11-248E9.6   | 0.014525  | 0.857665 Down-regulated in PsA |
| ZNF321P        | 0.0145504 | 1.02478 Up-regulated in PsA    |
| SRPX           | 0.0146319 | 2.07591 Up-regulated in PsA    |
| NOL10          | 0.0146454 | 0.804888 Down-regulated in PsA |
| DDX11-AS1      | 0.0146473 | 1.40578 Up-regulated in PsA    |
| PCNPP5         | 0.0146635 | 1.39557 Up-regulated in PsA    |
| RP11-107E5.3   | 0.0146717 | 0.704683 Down-regulated in PsA |
| RP11-388M20.2  | 0.0146854 | 1.17126 Up-regulated in PsA    |
| RP11-169K16.4  | 0.0146942 | 0.930529 Down-regulated in PsA |
| ST6GALNAC4     | 0.0146973 | 1.26136 Up-regulated in PsA    |
| RP11-517O13.3  | 0.0147115 | 0.81887 Down-regulated in PsA  |
| RP11-689C9.1   | 0.0147191 | 0.877453 Down-regulated in PsA |
| WDR89          | 0.0147225 | 0.576633 Down-regulated in PsA |
| RP11-747H12.4  | 0.0147386 | 1.13448 Up-regulated in PsA    |
| RP11-439A17.10 | 0.014747  | 0.631861 Down-regulated in PsA |
| RP11-368I23.3  | 0.0147575 | 0.849415 Down-regulated in PsA |
| MIR6735        | 0.014766  | 0.812285 Down-regulated in PsA |
| WIPF1          | 0.0147742 | 1.0489 Up-regulated in PsA     |
| CRAT           | 0.0147775 | 1.07158 Up-regulated in PsA    |

|               |           |                                |
|---------------|-----------|--------------------------------|
| MIR3162       | 0.014788  | 1.28211 Up-regulated in PsA    |
| PRTN3         | 0.0148911 | 1.06257 Up-regulated in PsA    |
| AC114755.3    | 0.0148973 | 0.925168 Down-regulated in PsA |
| UXT           | 0.0149073 | 1.1758 Up-regulated in PsA     |
| NPTN          | 0.0149548 | 0.811273 Down-regulated in PsA |
| FRRS1         | 0.0149608 | 0.493081 Down-regulated in PsA |
| RP11-205K6.1  | 0.0149717 | 1.79124 Up-regulated in PsA    |
| RQCD1         | 0.0149787 | 0.797466 Down-regulated in PsA |
| RN7SL359P     | 0.0150116 | 1.21893 Up-regulated in PsA    |
| PRRC2C        | 0.0150244 | 0.929762 Down-regulated in PsA |
| RP11-23E19.2  | 0.0150719 | 0.68832 Down-regulated in PsA  |
| ANKRD13C      | 0.0151438 | 0.702322 Down-regulated in PsA |
| MIR2052HG     | 0.0151583 | 1.12114 Up-regulated in PsA    |
| NDUFAF2       | 0.0151935 | 0.83039 Down-regulated in PsA  |
| CKS2          | 0.0152003 | 0.601748 Down-regulated in PsA |
| LINC01237     | 0.0152204 | 1.32609 Up-regulated in PsA    |
| SORT1         | 0.0152412 | 0.726037 Down-regulated in PsA |
| RP11-51L5.5   | 0.0152429 | 0.810048 Down-regulated in PsA |
| RP11-543P15.1 | 0.0152473 | 1.10662 Up-regulated in PsA    |
| RPS4XP14      | 0.0152681 | 1.32847 Up-regulated in PsA    |
| RP1-290I10.2  | 0.0152735 | 0.678444 Down-regulated in PsA |
| LOC101928887  | 0.015307  | 1.1672 Up-regulated in PsA     |
| OR5B17        | 0.0153341 | 0.570812 Down-regulated in PsA |
| RP11-304C12.4 | 0.0153373 | 1.10864 Up-regulated in PsA    |
| RP11-117L5.4  | 0.0153661 | 0.786289 Down-regulated in PsA |

|               |           |                                |
|---------------|-----------|--------------------------------|
| MORC1-AS1     | 0.015388  | 0.862121 Down-regulated in PsA |
| LOC101927472  | 0.0153909 | 1.17037 Up-regulated in PsA    |
| NCOA5         | 0.0153951 | 0.7564 Down-regulated in PsA   |
| DYRK1B        | 0.0154253 | 0.879671 Down-regulated in PsA |
| ASCL3         | 0.0154339 | 0.932192 Down-regulated in PsA |
| AZGP1P1       | 0.0154496 | 0.800049 Down-regulated in PsA |
| ATP2C1        | 0.0154506 | 0.792584 Down-regulated in PsA |
| ZNF402P       | 0.0154691 | 0.736615 Down-regulated in PsA |
| MIR3139       | 0.0154718 | 1.4666 Up-regulated in PsA     |
| TMPRSS11E     | 0.015505  | 1.3221 Up-regulated in PsA     |
| LINC01422     | 0.0155177 | 0.847663 Down-regulated in PsA |
| RN7SL304P     | 0.0155535 | 1.16452 Up-regulated in PsA    |
| MIR6819       | 0.0156085 | 1.29344 Up-regulated in PsA    |
| TRIM67        | 0.0156208 | 0.727064 Down-regulated in PsA |
| 7SK           | 0.0156331 | 0.87231 Down-regulated in PsA  |
| AC092675.4    | 0.0156414 | 1.30307 Up-regulated in PsA    |
| CASP10        | 0.0156491 | 0.815481 Down-regulated in PsA |
| RN7SL152P     | 0.0156531 | 1.20342 Up-regulated in PsA    |
| RP11-643G5.1  | 0.0156675 | 1.26995 Up-regulated in PsA    |
| RP11-426D19.1 | 0.0156911 | 0.639017 Down-regulated in PsA |
| HNRNPA3P9     | 0.0157094 | 1.21763 Up-regulated in PsA    |
| FAM122A       | 0.0157219 | 0.814201 Down-regulated in PsA |
| LINC00240     | 0.0157355 | 0.823104 Down-regulated in PsA |
| FTH1P22       | 0.0157419 | 1.24518 Up-regulated in PsA    |
| CHRFAM7A      | 0.0157641 | 0.634929 Down-regulated in PsA |

|                |           |                                |
|----------------|-----------|--------------------------------|
| KRT18P45       | 0.0157897 | 0.874473 Down-regulated in PsA |
| CNOT6          | 0.0157985 | 0.815923 Down-regulated in PsA |
| HDLBP          | 0.0158077 | 0.948886 Down-regulated in PsA |
| RP11-365O16.1  | 0.0158108 | 0.799706 Down-regulated in PsA |
| LOC102724917   | 0.0158191 | 1.34654 Up-regulated in PsA    |
| AC074011.2     | 0.0158352 | 1.16583 Up-regulated in PsA    |
| QPCT           | 0.0158693 | 0.874962 Down-regulated in PsA |
| RP11-446P9.1   | 0.0158698 | 0.635271 Down-regulated in PsA |
| RTN4RL2        | 0.0158878 | 0.864707 Down-regulated in PsA |
| RN7SL702P      | 0.0158934 | 0.714191 Down-regulated in PsA |
| SYNPO2L        | 0.0159069 | 1.1975 Up-regulated in PsA     |
| SYNPR          | 0.0159295 | 0.803779 Down-regulated in PsA |
| MNAT1          | 0.0159597 | 0.704699 Down-regulated in PsA |
| CFAP99         | 0.0160137 | 0.808303 Down-regulated in PsA |
| RP11-325D15.2  | 0.0160295 | 1.47712 Up-regulated in PsA    |
| SPRY4-IT1_1    | 0.0160308 | 0.671902 Down-regulated in PsA |
| HMMR-AS1       | 0.0160555 | 1.26259 Up-regulated in PsA    |
| UQCRFS1P2      | 0.0160896 | 1.2016 Up-regulated in PsA     |
| ICE2P1         | 0.0160952 | 0.788607 Down-regulated in PsA |
| SYT11          | 0.0161541 | 0.851486 Down-regulated in PsA |
| NUP58          | 0.0161667 | 0.781885 Down-regulated in PsA |
| AC009237.11    | 0.0161854 | 1.33131 Up-regulated in PsA    |
| PPP2R2D        | 0.0162044 | 0.793093 Down-regulated in PsA |
| LINC00106      | 0.0162304 | 0.820251 Down-regulated in PsA |
| RP11-163O19.11 | 0.0162664 | 1.29452 Up-regulated in PsA    |

|               |           |                                |
|---------------|-----------|--------------------------------|
| OR10H2        | 0.0162735 | 1.23855 Up-regulated in PsA    |
| AP000892.6    | 0.0162883 | 0.826161 Down-regulated in PsA |
| HIST1H4J      | 0.0162991 | 0.871403 Down-regulated in PsA |
| OR2K2         | 0.0163144 | 0.736422 Down-regulated in PsA |
| RIIAD1        | 0.0163187 | 0.758072 Down-regulated in PsA |
| FANCD2OS      | 0.0163447 | 0.721836 Down-regulated in PsA |
| RP11-285B24.1 | 0.0164063 | 0.854916 Down-regulated in PsA |
| RAB11FIP5     | 0.0164556 | 0.725301 Down-regulated in PsA |
| RP1-302D9.2   | 0.0164674 | 1.28524 Up-regulated in PsA    |
| RP1-149M18.4  | 0.0164677 | 1.1249 Up-regulated in PsA     |
| AC138472.4    | 0.0164829 | 1.06412 Up-regulated in PsA    |
| CHMP1B2P      | 0.0165964 | 1.22752 Up-regulated in PsA    |
| RP11-196H14.3 | 0.0166226 | 1.19604 Up-regulated in PsA    |
| CTD-2057J6.1  | 0.0166563 | 1.27676 Up-regulated in PsA    |
| IPO11         | 0.0167654 | 0.787619 Down-regulated in PsA |
| ANKRD33B-AS1  | 0.0167756 | 0.681028 Down-regulated in PsA |
| GTF2F2        | 0.0167846 | 0.841199 Down-regulated in PsA |
| GZMK          | 0.0167895 | 2.72679 Up-regulated in PsA    |
| FAM133DP      | 0.0167944 | 0.929857 Down-regulated in PsA |
| RP11-805L22.3 | 0.0168039 | 1.28031 Up-regulated in PsA    |
| RARRES2P8     | 0.0168192 | 1.29742 Up-regulated in PsA    |
| KLHL2P1       | 0.0168442 | 0.895179 Down-regulated in PsA |
| RP11-71H17.1  | 0.0168457 | 1.6249 Up-regulated in PsA     |
| SLC2A13       | 0.0168476 | 0.74903 Down-regulated in PsA  |
| RP4-751H13.5  | 0.0168592 | 1.19051 Up-regulated in PsA    |

|                |           |                                |
|----------------|-----------|--------------------------------|
| RP13-192B19.2  | 0.0168735 | 1.18166 Up-regulated in PsA    |
| LOC389247      | 0.0168821 | 1.12359 Up-regulated in PsA    |
| RAD23B         | 0.0168981 | 0.907729 Down-regulated in PsA |
| CTD-3006G17.2  | 0.0169246 | 1.10248 Up-regulated in PsA    |
| WASF2          | 0.0169533 | 1.0723 Up-regulated in PsA     |
| SYCN           | 0.016986  | 1.35747 Up-regulated in PsA    |
| DEPDC7         | 0.0169989 | 0.643557 Down-regulated in PsA |
| CTB-26E19.1    | 0.017095  | 1.31458 Up-regulated in PsA    |
| RP11-687D19.1  | 0.0171075 | 0.927511 Down-regulated in PsA |
| MFSD14C        | 0.0171172 | 0.703848 Down-regulated in PsA |
| CHMP7          | 0.0171405 | 0.743544 Down-regulated in PsA |
| ACAA1          | 0.0171557 | 0.927201 Down-regulated in PsA |
| USP39          | 0.0171663 | 0.901638 Down-regulated in PsA |
| CCDC114        | 0.0172412 | 1.18658 Up-regulated in PsA    |
| DMP1           | 0.0172565 | 0.867076 Down-regulated in PsA |
| RP11-250H24.7  | 0.0172716 | 1.45391 Up-regulated in PsA    |
| RP11-795A2.2   | 0.0172864 | 1.2763 Up-regulated in PsA     |
| ATP6V1E1       | 0.0172877 | 0.727702 Down-regulated in PsA |
| RP11-465L10.10 | 0.0172893 | 1.39402 Up-regulated in PsA    |
| RP11-20D14.6   | 0.0173159 | 0.695902 Down-regulated in PsA |
| COL18A1-AS2    | 0.0173424 | 1.16075 Up-regulated in PsA    |
| Metazoa_SRP    | 0.0173503 | 0.888684 Down-regulated in PsA |
| RP11-48O20.5   | 0.0173504 | 1.58567 Up-regulated in PsA    |
| ELAVL1         | 0.0173678 | 0.894152 Down-regulated in PsA |
| PRM3           | 0.0173752 | 0.858603 Down-regulated in PsA |

|               |           |                                |
|---------------|-----------|--------------------------------|
| WWC2-AS1      | 0.017384  | 1.30938 Up-regulated in PsA    |
| MYBBP1A       | 0.0173848 | 0.868042 Down-regulated in PsA |
| PLEKHB2       | 0.0173971 | 0.861432 Down-regulated in PsA |
| AC114730.7    | 0.0174025 | 1.15484 Up-regulated in PsA    |
| PF4           | 0.0174538 | 2.02182 Up-regulated in PsA    |
| RP11-770E5.2  | 0.0174545 | 1.35742 Up-regulated in PsA    |
| FAM160A2      | 0.0174657 | 0.915063 Down-regulated in PsA |
| NUP50-AS1     | 0.0174905 | 0.750337 Down-regulated in PsA |
| DIMT1         | 0.0175513 | 0.754307 Down-regulated in PsA |
| RP11-729M20.1 | 0.0175964 | 0.89866 Down-regulated in PsA  |
| MAK16         | 0.0176028 | 0.855824 Down-regulated in PsA |
| RP11-10J21.2  | 0.0176541 | 1.19296 Up-regulated in PsA    |
| RP11-983C2.3  | 0.0176565 | 0.727904 Down-regulated in PsA |
| TCEB1P35      | 0.0176803 | 0.784056 Down-regulated in PsA |
| RP11-136O12.2 | 0.0176949 | 1.33008 Up-regulated in PsA    |
| RP11-54I5.1   | 0.0177273 | 0.551702 Down-regulated in PsA |
| SH2D4B        | 0.0177321 | 1.16083 Up-regulated in PsA    |
| AC020743.4    | 0.0177476 | 1.31179 Up-regulated in PsA    |
| PGM3          | 0.0177549 | 0.589768 Down-regulated in PsA |
| SLCO4A1       | 0.0177623 | 0.855806 Down-regulated in PsA |
| ATXN3         | 0.0177625 | 0.768441 Down-regulated in PsA |
| RP11-333J10.2 | 0.0177856 | 0.861757 Down-regulated in PsA |
| RP11-318K15.2 | 0.0177879 | 0.718097 Down-regulated in PsA |
| SNORA14B      | 0.017797  | 1.32004 Up-regulated in PsA    |
| YWHAH         | 0.0178351 | 0.7419 Down-regulated in PsA   |



|              |           |                                |
|--------------|-----------|--------------------------------|
| AC006960.7   | 0.0178386 | 1.30169 Up-regulated in PsA    |
| RP11-337N6.2 | 0.0178611 | 1.28715 Up-regulated in PsA    |
| SLA2         | 0.017866  | 1.37493 Up-regulated in PsA    |
| SMIM12       | 0.0178747 | 0.847768 Down-regulated in PsA |
| SLC15A2      | 0.0179188 | 0.669679 Down-regulated in PsA |
| RNU6-835P    | 0.0179522 | 1.28381 Up-regulated in PsA    |
| MRPL20       | 0.0180122 | 0.894509 Down-regulated in PsA |
| CREB3L1      | 0.0180551 | 0.792143 Down-regulated in PsA |
| PDCD11       | 0.0180595 | 0.682719 Down-regulated in PsA |
| ZNF624       | 0.018065  | 0.607614 Down-regulated in PsA |
| GAP43        | 0.0180888 | 1.45852 Up-regulated in PsA    |
| RP11-75L1.1  | 0.0181117 | 1.4078 Up-regulated in PsA     |
| NOTCH2       | 0.0181676 | 0.908545 Down-regulated in PsA |
| CTAGE16P     | 0.0181679 | 0.750665 Down-regulated in PsA |
| WBP1LP6      | 0.0181728 | 0.71719 Down-regulated in PsA  |
| ZC3H8        | 0.0181738 | 0.63811 Down-regulated in PsA  |
| HMGN5        | 0.018217  | 0.817583 Down-regulated in PsA |
| ATM          | 0.0182896 | 0.84475 Down-regulated in PsA  |
| MINPP1       | 0.0183039 | 0.666342 Down-regulated in PsA |
| SMIM14       | 0.0183531 | 0.690021 Down-regulated in PsA |
| RN7SKP278    | 0.0183662 | 1.49364 Up-regulated in PsA    |
| GSG1         | 0.0183758 | 0.677412 Down-regulated in PsA |
| RP11-545G3.1 | 0.0184159 | 0.736202 Down-regulated in PsA |
| RP1-178F10.1 | 0.0184301 | 0.841511 Down-regulated in PsA |
| MLANA        | 0.0184312 | 0.676498 Down-regulated in PsA |

|               |           |                                |
|---------------|-----------|--------------------------------|
| EIF4EBP2P3    | 0.0184475 | 0.836286 Down-regulated in PsA |
| Metazoa_SRP   | 0.0184481 | 0.68337 Down-regulated in PsA  |
| LOC441178     | 0.0184534 | 1.24807 Up-regulated in PsA    |
| DBET          | 0.0185185 | 1.25487 Up-regulated in PsA    |
| AMOT          | 0.0185199 | 0.835162 Down-regulated in PsA |
| LOC102724814  | 0.0185697 | 0.880819 Down-regulated in PsA |
| RP11-384J4.2  | 0.018583  | 1.30326 Up-regulated in PsA    |
| RP11-290D2.5  | 0.0186073 | 0.745082 Down-regulated in PsA |
| ZC3H7A        | 0.0186083 | 1.06013 Up-regulated in PsA    |
| KREMEN2       | 0.0186355 | 0.836913 Down-regulated in PsA |
| SSXP10        | 0.0186995 | 0.679593 Down-regulated in PsA |
| SNORD77       | 0.0187483 | 0.886156 Down-regulated in PsA |
| DCAF4L2       | 0.0187506 | 0.79433 Down-regulated in PsA  |
| XKR3          | 0.0187511 | 0.881367 Down-regulated in PsA |
| AKR7A3        | 0.0187652 | 0.801105 Down-regulated in PsA |
| RP1-148H17.1  | 0.0187911 | 1.13723 Up-regulated in PsA    |
| RP11-315E17.1 | 0.0187998 | 1.50431 Up-regulated in PsA    |
| RP11-433O3.1  | 0.0188008 | 1.28259 Up-regulated in PsA    |
| ATP6V1G1      | 0.0188028 | 0.897796 Down-regulated in PsA |
| VTRNA2-2P     | 0.0188032 | 0.672774 Down-regulated in PsA |
| TNFSF14       | 0.0188067 | 0.811751 Down-regulated in PsA |
| RP11-170L3.4  | 0.0188095 | 0.729645 Down-regulated in PsA |
| DKC1          | 0.0188189 | 0.781778 Down-regulated in PsA |
| CTD-2363C16.1 | 0.0188297 | 1.33977 Up-regulated in PsA    |
| CTD-2366F13.2 | 0.0188743 | 1.62013 Up-regulated in PsA    |

|               |           |                                |
|---------------|-----------|--------------------------------|
| RP11-53L24.1  | 0.0188747 | 1.09996 Up-regulated in PsA    |
| TMEM237       | 0.0189005 | 1.17557 Up-regulated in PsA    |
| CTD-2552B11.3 | 0.0189066 | 1.22946 Up-regulated in PsA    |
| PTCH2         | 0.018955  | 0.92298 Down-regulated in PsA  |
| SBF1          | 0.0189577 | 1.13332 Up-regulated in PsA    |
| KCNJ2-AS1     | 0.0189608 | 0.579943 Down-regulated in PsA |
| MIR3926-2     | 0.0189731 | 0.744441 Down-regulated in PsA |
| ZNF705D       | 0.0189742 | 1.24469 Up-regulated in PsA    |
| ZDHHC21       | 0.0189793 | 0.624503 Down-regulated in PsA |
| EPDR1         | 0.0189811 | 0.771774 Down-regulated in PsA |
| RP11-197B12.1 | 0.0190294 | 1.18076 Up-regulated in PsA    |
| SIGLEC11      | 0.0190432 | 0.72625 Down-regulated in PsA  |
| LOC100129973  | 0.0190662 | 1.62503 Up-regulated in PsA    |
| SKIV2L        | 0.0190712 | 0.93047 Down-regulated in PsA  |
| CHCHD2P1      | 0.0190833 | 0.798123 Down-regulated in PsA |
| NDUFC1        | 0.0190853 | 0.936891 Down-regulated in PsA |
| ACOX1         | 0.0190902 | 0.769621 Down-regulated in PsA |
| DYM           | 0.0190986 | 0.858114 Down-regulated in PsA |
| SMG1P7        | 0.0191065 | 0.781551 Down-regulated in PsA |
| LOC100506188  | 0.0191079 | 0.705351 Down-regulated in PsA |
| RP11-419I17.1 | 0.0191202 | 0.792948 Down-regulated in PsA |
| RP11-12A20.11 | 0.0191411 | 1.31495 Up-regulated in PsA    |
| EBNA1BP2      | 0.0191974 | 0.859401 Down-regulated in PsA |
| MAP3K7CL      | 0.0192233 | 1.86997 Up-regulated in PsA    |
| RP5-894D12.4  | 0.0192257 | 1.20491 Up-regulated in PsA    |

|               |           |                                |
|---------------|-----------|--------------------------------|
| AC092162.1    | 0.0192417 | 0.899586 Down-regulated in PsA |
| TCEB1P13      | 0.0192768 | 0.704895 Down-regulated in PsA |
| RPL21P8       | 0.0192906 | 1.08356 Up-regulated in PsA    |
| ADI1          | 0.019309  | 0.804776 Down-regulated in PsA |
| MIR7641-1     | 0.0193107 | 1.2913 Up-regulated in PsA     |
| GKN2          | 0.019325  | 0.777372 Down-regulated in PsA |
| HPRT1P1       | 0.0193417 | 1.35989 Up-regulated in PsA    |
| PDZPH1P       | 0.0193436 | 1.20543 Up-regulated in PsA    |
| PIP4K2B       | 0.0193506 | 0.802716 Down-regulated in PsA |
| PCP4L1        | 0.0193545 | 0.863968 Down-regulated in PsA |
| TTI2          | 0.0193597 | 0.793068 Down-regulated in PsA |
| LOC728613     | 0.0193933 | 0.825965 Down-regulated in PsA |
| OR52N1        | 0.0194112 | 0.912864 Down-regulated in PsA |
| RP11-22N19.2  | 0.0194231 | 0.804914 Down-regulated in PsA |
| RAD17P1       | 0.0194419 | 0.889053 Down-regulated in PsA |
| NAA30         | 0.01947   | 0.7455 Down-regulated in PsA   |
| TMLHE-AS1     | 0.0194882 | 1.3337 Up-regulated in PsA     |
| KRT20         | 0.0194931 | 0.726887 Down-regulated in PsA |
| EXTL2P1       | 0.0195467 | 0.822914 Down-regulated in PsA |
| RP11-151N17.1 | 0.019549  | 1.11702 Up-regulated in PsA    |
| RP11-219F10.1 | 0.0195606 | 0.751819 Down-regulated in PsA |
| BMP7          | 0.0195704 | 0.678616 Down-regulated in PsA |
| TACR3         | 0.0196665 | 0.485627 Down-regulated in PsA |
| PROC          | 0.0196768 | 0.906399 Down-regulated in PsA |
| TLX1          | 0.0196828 | 0.685978 Down-regulated in PsA |

|               |           |                                |
|---------------|-----------|--------------------------------|
| SPG20         | 0.0197527 | 0.725681 Down-regulated in PsA |
| NAPB          | 0.0197566 | 0.812473 Down-regulated in PsA |
| RP11-276M12.1 | 0.0197593 | 1.24014 Up-regulated in PsA    |
| RP11-108E14.1 | 0.0197838 | 1.12497 Up-regulated in PsA    |
| COL4A2        | 0.0197929 | 1.28739 Up-regulated in PsA    |
| RP11-453N3.7  | 0.0197997 | 0.767813 Down-regulated in PsA |
| AC007277.3    | 0.019826  | 0.908734 Down-regulated in PsA |
| ASCC2         | 0.0198376 | 0.932375 Down-regulated in PsA |
| RP11-760D2.4  | 0.0198622 | 0.877175 Down-regulated in PsA |
| KB-318B8.7    | 0.0198623 | 1.46981 Up-regulated in PsA    |
| GAS6-AS1      | 0.0199147 | 0.835311 Down-regulated in PsA |
| HAO1          | 0.019941  | 0.718023 Down-regulated in PsA |
| Y_RNA         | 0.0199474 | 1.15719 Up-regulated in PsA    |
| CTD-2325M2.1  | 0.0199479 | 2.16951 Up-regulated in PsA    |
| GLIS2         | 0.0199487 | 1.16523 Up-regulated in PsA    |
| SETP8         | 0.0199528 | 0.565301 Down-regulated in PsA |
| PAN2          | 0.0199664 | 0.800124 Down-regulated in PsA |
| MIR3180-5     | 0.0200104 | 1.0966 Up-regulated in PsA     |
| RP11-463I20.4 | 0.0200139 | 1.66578 Up-regulated in PsA    |
| PRSS55        | 0.0200156 | 1.26807 Up-regulated in PsA    |
| SEC24C        | 0.0200214 | 0.795202 Down-regulated in PsA |
| CCDC58        | 0.0200285 | 0.569073 Down-regulated in PsA |
| RP11-373F14.1 | 0.0200513 | 1.13001 Up-regulated in PsA    |
| CTB-60B18.12  | 0.020078  | 1.14075 Up-regulated in PsA    |
| EIF4ENIF1     | 0.02008   | 0.796216 Down-regulated in PsA |

|               |           |                                |
|---------------|-----------|--------------------------------|
| MOB3C         | 0.0200824 | 0.767912 Down-regulated in PsA |
| RP11-113O24.3 | 0.0200882 | 1.13123 Up-regulated in PsA    |
| LSM14B        | 0.0201379 | 0.783253 Down-regulated in PsA |
| SLC26A6       | 0.0201564 | 0.824539 Down-regulated in PsA |
| ALOX5         | 0.0201575 | 0.924192 Down-regulated in PsA |
| RP11-856M7.4  | 0.0201602 | 1.39918 Up-regulated in PsA    |
| ROCK1P1       | 0.0201752 | 0.713584 Down-regulated in PsA |
| LINC00511     | 0.0202645 | 1.18185 Up-regulated in PsA    |
| AP2S1         | 0.0202828 | 0.948179 Down-regulated in PsA |
| LEAP2         | 0.0202912 | 0.799531 Down-regulated in PsA |
| RP5-944M2.4   | 0.0203293 | 1.04645 Up-regulated in PsA    |
| LOC389831     | 0.020363  | 1.15309 Up-regulated in PsA    |
| SIGLEC15      | 0.0204251 | 0.985713 Down-regulated in PsA |
| RASEF         | 0.0204311 | 1.23573 Up-regulated in PsA    |
| HHAT          | 0.0204671 | 0.858157 Down-regulated in PsA |
| LOC440434     | 0.0204699 | 0.885982 Down-regulated in PsA |
| LOC101928358  | 0.0204821 | 0.942956 Down-regulated in PsA |
| RP4-641G12.4  | 0.0204876 | 0.666389 Down-regulated in PsA |
| VIPR1-AS1     | 0.0204957 | 0.876643 Down-regulated in PsA |
| UPF3B         | 0.0205169 | 0.708155 Down-regulated in PsA |
| LURAP1L-AS1   | 0.0205222 | 1.3086 Up-regulated in PsA     |
| MTND5P4       | 0.0205361 | 1.30402 Up-regulated in PsA    |
| RP11-21I4.2   | 0.0205449 | 0.792026 Down-regulated in PsA |
| RP11-30K9.7   | 0.0205575 | 1.48706 Up-regulated in PsA    |
| AP4B1-AS1     | 0.0205621 | 0.477906 Down-regulated in PsA |

|               |           |                                |
|---------------|-----------|--------------------------------|
| Y_RNA         | 0.0205653 | 1.29596 Up-regulated in PsA    |
| RNF43         | 0.0205718 | 0.904343 Down-regulated in PsA |
| RNU6-441P     | 0.0205732 | 0.847589 Down-regulated in PsA |
| MTATP6P16     | 0.0205893 | 0.860777 Down-regulated in PsA |
| CTD-3126B10.2 | 0.0206093 | 1.16678 Up-regulated in PsA    |
| RAB9AP4       | 0.0206215 | 1.21603 Up-regulated in PsA    |
| CYLC2         | 0.0206293 | 0.955061 Down-regulated in PsA |
| KIAA0100      | 0.0206293 | 0.952486 Down-regulated in PsA |
| RP11-582J16.4 | 0.0206305 | 1.25815 Up-regulated in PsA    |
| AKAP13        | 0.0206352 | 0.780432 Down-regulated in PsA |
| BMP3          | 0.0206691 | 1.40898 Up-regulated in PsA    |
| RP11-629N8.3  | 0.0206726 | 1.20225 Up-regulated in PsA    |
| EEF1GP6       | 0.020719  | 1.08959 Up-regulated in PsA    |
| MIR4451       | 0.0207287 | 0.784973 Down-regulated in PsA |
| HPN-AS1       | 0.0207293 | 1.04318 Up-regulated in PsA    |
| SNX5P1        | 0.0207325 | 0.678436 Down-regulated in PsA |
| RP11-461L13.4 | 0.0207363 | 0.778197 Down-regulated in PsA |
| NACAP2        | 0.0207828 | 1.02954 Up-regulated in PsA    |
| CTC-498M16.4  | 0.0208078 | 0.885884 Down-regulated in PsA |
| OR5AP2        | 0.0208125 | 0.74335 Down-regulated in PsA  |
| TTL           | 0.0208263 | 0.907511 Down-regulated in PsA |
| RP11-162A12.3 | 0.0208296 | 1.18928 Up-regulated in PsA    |
| UBR5          | 0.0208382 | 0.797174 Down-regulated in PsA |
| LOC101928162  | 0.0208713 | 1.24529 Up-regulated in PsA    |
| TPMT          | 0.0208755 | 0.75415 Down-regulated in PsA  |

|                |           |                                |
|----------------|-----------|--------------------------------|
| AD001527.7     | 0.0209436 | 1.03683 Up-regulated in PsA    |
| EEF1A1P15      | 0.0209478 | 0.912038 Down-regulated in PsA |
| Y_RNA          | 0.0209553 | 0.800793 Down-regulated in PsA |
| ANKRD26P4      | 0.0210136 | 0.715536 Down-regulated in PsA |
| CNTN6          | 0.0210466 | 0.763279 Down-regulated in PsA |
| RP11-40H20.4   | 0.0210497 | 1.11023 Up-regulated in PsA    |
| MIR518E        | 0.0210655 | 0.684677 Down-regulated in PsA |
| TRIM44         | 0.0210921 | 0.814904 Down-regulated in PsA |
| EIF2B5-AS1     | 0.0210987 | 1.28073 Up-regulated in PsA    |
| FAP            | 0.021109  | 0.856127 Down-regulated in PsA |
| C2orf27AP1     | 0.0211348 | 0.865811 Down-regulated in PsA |
| RNA5SP350      | 0.0211469 | 1.11076 Up-regulated in PsA    |
| CACNA1C-IT1    | 0.0211557 | 1.31874 Up-regulated in PsA    |
| ANAPC4         | 0.021163  | 0.881069 Down-regulated in PsA |
| LOC105372672   | 0.0211727 | 1.20185 Up-regulated in PsA    |
| AC005324.6     | 0.0211819 | 0.747 Down-regulated in PsA    |
| MAB21L2        | 0.0212165 | 1.2236 Up-regulated in PsA     |
| RP11-968A15.2  | 0.0212216 | 1.09478 Up-regulated in PsA    |
| RP11-29H23.6   | 0.0212369 | 1.2414 Up-regulated in PsA     |
| RP11-536C10.11 | 0.0212377 | 0.760156 Down-regulated in PsA |
| RP11-475A13.1  | 0.0212706 | 1.43155 Up-regulated in PsA    |
| CLIC3          | 0.0212863 | 1.37773 Up-regulated in PsA    |
| CACNA1C-IT2    | 0.0212989 | 1.58241 Up-regulated in PsA    |
| ITSN2          | 0.021324  | 0.798066 Down-regulated in PsA |
| POLR1B         | 0.0213387 | 0.758308 Down-regulated in PsA |



|               |           |                                |
|---------------|-----------|--------------------------------|
| DNAJC6        | 0.0213538 | 1.42327 Up-regulated in PsA    |
| CTC-215O4.4   | 0.0213553 | 1.32052 Up-regulated in PsA    |
| ADAD1P2       | 0.0213637 | 1.32237 Up-regulated in PsA    |
| DDX11L16      | 0.021373  | 1.86964 Up-regulated in PsA    |
| DHX33         | 0.021403  | 0.679742 Down-regulated in PsA |
| MHRT          | 0.0214096 | 1.17842 Up-regulated in PsA    |
| AC010468.1    | 0.0214117 | 1.19915 Up-regulated in PsA    |
| OSBP          | 0.0214374 | 0.90746 Down-regulated in PsA  |
| GAPVD1        | 0.0214599 | 0.80606 Down-regulated in PsA  |
| GTF2IRD1      | 0.0214681 | 1.03935 Up-regulated in PsA    |
| RP3-431P23.2  | 0.0215201 | 1.39468 Up-regulated in PsA    |
| SFTPB         | 0.0215235 | 0.845953 Down-regulated in PsA |
| IQCK          | 0.0215345 | 1.43964 Up-regulated in PsA    |
| SCARNA22      | 0.0215726 | 0.910386 Down-regulated in PsA |
| AC005498.4    | 0.0216293 | 0.802889 Down-regulated in PsA |
| IDH3A         | 0.021636  | 0.894865 Down-regulated in PsA |
| NEUROD1       | 0.0216371 | 0.888773 Down-regulated in PsA |
| RP11-100N21.1 | 0.0216694 | 1.01953 Up-regulated in PsA    |
| TUBB4BP6      | 0.0216786 | 1.42421 Up-regulated in PsA    |
| TMF1          | 0.0216836 | 0.784299 Down-regulated in PsA |
| LOC101927020  | 0.0216984 | 1.45186 Up-regulated in PsA    |
| RGS4          | 0.0217185 | 1.36256 Up-regulated in PsA    |
| RN7SL470P     | 0.0217291 | 1.04904 Up-regulated in PsA    |
| RP11-124N3.3  | 0.0217423 | 1.14055 Up-regulated in PsA    |
| CTSL          | 0.0217646 | 0.601047 Down-regulated in PsA |

|               |           |                                |
|---------------|-----------|--------------------------------|
| CTC-436P18.5  | 0.0217879 | 0.841057 Down-regulated in PsA |
| MAPK14        | 0.0218147 | 0.687047 Down-regulated in PsA |
| ANAPC5        | 0.0218168 | 0.898068 Down-regulated in PsA |
| MIPOL1        | 0.0218279 | 0.570345 Down-regulated in PsA |
| B3GALNT1P1    | 0.0218381 | 1.46657 Up-regulated in PsA    |
| DNAH11        | 0.0218995 | 0.695589 Down-regulated in PsA |
| RP11-757H14.2 | 0.021905  | 0.854912 Down-regulated in PsA |
| SREK1IP1      | 0.0219057 | 0.757382 Down-regulated in PsA |
| PRAMEF10      | 0.0219102 | 0.8109 Down-regulated in PsA   |
| GPR157        | 0.0219195 | 1.18183 Up-regulated in PsA    |
| HP1BP3        | 0.0219291 | 0.882253 Down-regulated in PsA |
| C21orf59      | 0.0219322 | 0.843396 Down-regulated in PsA |
| VPS11         | 0.0219471 | 0.902523 Down-regulated in PsA |
| C10orf88      | 0.0219492 | 0.436408 Down-regulated in PsA |
| STX1B         | 0.0219819 | 1.73503 Up-regulated in PsA    |
| LINC01372     | 0.0219885 | 0.587521 Down-regulated in PsA |
| RP4-785G19.2  | 0.0220049 | 1.1633 Up-regulated in PsA     |
| ZMYM4         | 0.0220163 | 0.872016 Down-regulated in PsA |
| TAT           | 0.0220465 | 1.42251 Up-regulated in PsA    |
| MIR558        | 0.0220739 | 0.772378 Down-regulated in PsA |
| RP13-616I3.1  | 0.022082  | 1.4256 Up-regulated in PsA     |
| RND1          | 0.0221122 | 0.830445 Down-regulated in PsA |
| SNRNP35       | 0.0221555 | 0.866157 Down-regulated in PsA |
| RP11-546K22.3 | 0.0221763 | 1.23604 Up-regulated in PsA    |
| RNF26         | 0.0222037 | 1.17515 Up-regulated in PsA    |

|                |           |                                |
|----------------|-----------|--------------------------------|
| ETFDH          | 0.0222237 | 0.633569 Down-regulated in PsA |
| WRAP53         | 0.0222495 | 0.778695 Down-regulated in PsA |
| AC009237.4     | 0.0222572 | 0.948452 Down-regulated in PsA |
| CFAP77         | 0.022273  | 0.81457 Down-regulated in PsA  |
| RP11-586D5.3   | 0.0222832 | 1.27151 Up-regulated in PsA    |
| LINC00642      | 0.0223251 | 1.63664 Up-regulated in PsA    |
| CASP5          | 0.0223336 | 0.765088 Down-regulated in PsA |
| Y_RNA          | 0.0223439 | 1.13401 Up-regulated in PsA    |
| MYHAS          | 0.0224065 | 0.777833 Down-regulated in PsA |
| Y_RNA          | 0.02245   | 0.866315 Down-regulated in PsA |
| PFN1P11        | 0.0224554 | 1.25679 Up-regulated in PsA    |
| CCDC38         | 0.0224933 | 0.796525 Down-regulated in PsA |
| NBPF21P        | 0.0224945 | 1.13295 Up-regulated in PsA    |
| NBPF2P         | 0.0224967 | 0.862198 Down-regulated in PsA |
| C6orf25        | 0.0225149 | 1.32112 Up-regulated in PsA    |
| RP11-336A10.7  | 0.0225486 | 1.07781 Up-regulated in PsA    |
| LOC100130075   | 0.0225609 | 1.39664 Up-regulated in PsA    |
| RP11-798K3.3   | 0.0225807 | 0.917154 Down-regulated in PsA |
| LOC643802      | 0.0226118 | 0.862231 Down-regulated in PsA |
| TIMM23         | 0.0226182 | 0.870433 Down-regulated in PsA |
| PAX7           | 0.0226682 | 0.840745 Down-regulated in PsA |
| RP11-517C16.2  | 0.0226906 | 1.29949 Up-regulated in PsA    |
| ZNF532         | 0.0226971 | 0.715587 Down-regulated in PsA |
| TUBA8          | 0.0227001 | 0.903879 Down-regulated in PsA |
| RP11-1141N12.1 | 0.0227139 | 0.822602 Down-regulated in PsA |

|                |           |                                |
|----------------|-----------|--------------------------------|
| MIR6075        | 0.0227825 | 1.24194 Up-regulated in PsA    |
| NAV2-AS4       | 0.0227955 | 1.49169 Up-regulated in PsA    |
| HNRNPCL4       | 0.0228079 | 0.674554 Down-regulated in PsA |
| AC002386.1     | 0.0228202 | 0.914189 Down-regulated in PsA |
| RP1-13D10.2    | 0.0228421 | 0.752957 Down-regulated in PsA |
| PP7080         | 0.0228478 | 1.24837 Up-regulated in PsA    |
| OR8G2          | 0.0229171 | 1.22237 Up-regulated in PsA    |
| RN7SL764P      | 0.0229338 | 1.18596 Up-regulated in PsA    |
| RP11-1072C15.6 | 0.0229385 | 0.663367 Down-regulated in PsA |
| MIR4472-1      | 0.0229457 | 1.25103 Up-regulated in PsA    |
| MRPS9          | 0.0229587 | 0.781036 Down-regulated in PsA |
| RP11-542K23.7  | 0.022962  | 1.51913 Up-regulated in PsA    |
| RP1-95L4.3     | 0.0229637 | 0.895278 Down-regulated in PsA |
| COPB1          | 0.0229755 | 0.820122 Down-regulated in PsA |
| AC009133.17    | 0.0229906 | 1.26143 Up-regulated in PsA    |
| RP11-474L11.3  | 0.0230052 | 1.21599 Up-regulated in PsA    |
| MTRF1LP1       | 0.0230215 | 1.26197 Up-regulated in PsA    |
| BGLT3          | 0.0230895 | 0.628864 Down-regulated in PsA |
| RP11-882I15.1  | 0.0231062 | 1.06384 Up-regulated in PsA    |
| DLG1-AS1       | 0.023137  | 1.26301 Up-regulated in PsA    |
| SAMD14         | 0.0231687 | 1.2063 Up-regulated in PsA     |
| RN7SKP83       | 0.0232007 | 1.20647 Up-regulated in PsA    |
| DIAPH2         | 0.023207  | 0.847188 Down-regulated in PsA |
| MIR1302-8      | 0.0232215 | 1.24601 Up-regulated in PsA    |
| LOC101929721   | 0.0232339 | 1.26834 Up-regulated in PsA    |

|                  |           |                                |
|------------------|-----------|--------------------------------|
| PAK1IP1          | 0.0232462 | 0.751605 Down-regulated in PsA |
| PPID             | 0.0232888 | 0.678186 Down-regulated in PsA |
| ADAM32           | 0.023297  | 0.63202 Down-regulated in PsA  |
| ALG1             | 0.0233057 | 0.790346 Down-regulated in PsA |
| KIAA0753         | 0.0233106 | 0.693035 Down-regulated in PsA |
| RP11-309H21.3    | 0.0233197 | 1.42125 Up-regulated in PsA    |
| RP11-340I6.7     | 0.0233434 | 1.20962 Up-regulated in PsA    |
| RP11-530C5.2     | 0.0233898 | 0.7725 Down-regulated in PsA   |
| RP11-1H8.5       | 0.0234094 | 1.1609 Up-regulated in PsA     |
| RN7SL330P        | 0.0234098 | 1.36345 Up-regulated in PsA    |
| C1orf95          | 0.0234173 | 0.882603 Down-regulated in PsA |
| OFD1P3Y          | 0.0234303 | 1.30087 Up-regulated in PsA    |
| MIR1538          | 0.0234324 | 1.26668 Up-regulated in PsA    |
| SNORA13          | 0.0234378 | 1.40018 Up-regulated in PsA    |
| RP11-1082L8.4    | 0.0234735 | 0.838503 Down-regulated in PsA |
| AC010145.4       | 0.0235106 | 0.860027 Down-regulated in PsA |
| LL22NC03-24A12.8 | 0.0235142 | 1.46078 Up-regulated in PsA    |
| OR5M11           | 0.0235431 | 0.559693 Down-regulated in PsA |
| CACNA1A          | 0.023553  | 0.776837 Down-regulated in PsA |
| RP11-746P2.5     | 0.023566  | 1.35092 Up-regulated in PsA    |
| DDX39B-AS1       | 0.0235782 | 1.25862 Up-regulated in PsA    |
| RP13-39P12.2     | 0.02358   | 0.848749 Down-regulated in PsA |
| RP11-68E19.1     | 0.0235853 | 0.770848 Down-regulated in PsA |
| KRI1             | 0.0236193 | 0.647284 Down-regulated in PsA |
| NTN5             | 0.023638  | 0.85983 Down-regulated in PsA  |

|               |           |                                |
|---------------|-----------|--------------------------------|
| UBE2Z         | 0.0236519 | 1.15634 Up-regulated in PsA    |
| RP11-431M3.1  | 0.0236849 | 0.859079 Down-regulated in PsA |
| MYCNUT        | 0.0237128 | 1.22998 Up-regulated in PsA    |
| RP11-12A16.3  | 0.0237619 | 1.17866 Up-regulated in PsA    |
| MYL12BP1      | 0.0237968 | 0.864669 Down-regulated in PsA |
| TNPO1P3       | 0.0238005 | 0.52588 Down-regulated in PsA  |
| RP11-23E19.1  | 0.0238149 | 1.26061 Up-regulated in PsA    |
| RP11-431K24.2 | 0.0238156 | 1.18624 Up-regulated in PsA    |
| GLYCAM1       | 0.0238321 | 1.24675 Up-regulated in PsA    |
| MRPL3P1       | 0.0238374 | 0.808676 Down-regulated in PsA |
| POTEB2        | 0.0238763 | 1.27004 Up-regulated in PsA    |
| SNORD113-7    | 0.0239015 | 1.23845 Up-regulated in PsA    |
| GPLD1         | 0.0239165 | 0.819672 Down-regulated in PsA |
| ZNF347        | 0.0239206 | 0.61531 Down-regulated in PsA  |
| LINC00951     | 0.0239246 | 0.716109 Down-regulated in PsA |
| RP5-1132H15.2 | 0.0239256 | 0.873986 Down-regulated in PsA |
| RP11-291O7.1  | 0.0239381 | 0.785648 Down-regulated in PsA |
| RP1-96H9.5    | 0.0239692 | 1.13928 Up-regulated in PsA    |
| ABCD2         | 0.0239814 | 0.590476 Down-regulated in PsA |
| RNMTL1P1      | 0.0239921 | 1.13825 Up-regulated in PsA    |
| LINC00605     | 0.0240451 | 0.695844 Down-regulated in PsA |
| FRMPD2B       | 0.0240547 | 0.828948 Down-regulated in PsA |
| RAD9A         | 0.0240983 | 0.781374 Down-regulated in PsA |
| ZNF33BP1      | 0.0241637 | 0.833233 Down-regulated in PsA |
| RP11-510J16.5 | 0.0241719 | 0.61222 Down-regulated in PsA  |

|               |           |                                |
|---------------|-----------|--------------------------------|
| CFAP161       | 0.0241942 | 1.37444 Up-regulated in PsA    |
| RP11-399E6.4  | 0.0242013 | 1.18795 Up-regulated in PsA    |
| RP11-234A1.1  | 0.024205  | 1.40774 Up-regulated in PsA    |
| LINC01548     | 0.0242617 | 1.43886 Up-regulated in PsA    |
| MIR367        | 0.0242935 | 1.05669 Up-regulated in PsA    |
| AC108004.3    | 0.0243003 | 1.40483 Up-regulated in PsA    |
| C9orf85       | 0.024321  | 0.733874 Down-regulated in PsA |
| CCT4          | 0.0243251 | 0.793996 Down-regulated in PsA |
| C9orf40       | 0.0243493 | 0.751785 Down-regulated in PsA |
| RP4-584D14.5  | 0.0243587 | 1.25515 Up-regulated in PsA    |
| RP11-362L22.1 | 0.0243795 | 1.22971 Up-regulated in PsA    |
| MIR5692C1     | 0.0243847 | 0.883853 Down-regulated in PsA |
| LOC100505609  | 0.0244118 | 0.711954 Down-regulated in PsA |
| MIR548AY      | 0.0244257 | 0.647893 Down-regulated in PsA |
| EPM2A         | 0.0244288 | 0.776564 Down-regulated in PsA |
| UBQLN1P1      | 0.024431  | 0.708482 Down-regulated in PsA |
| MED8          | 0.024459  | 0.846488 Down-regulated in PsA |
| RP4-593M8.1   | 0.0245242 | 0.669435 Down-regulated in PsA |
| GNPNAT1       | 0.0245393 | 0.666008 Down-regulated in PsA |
| AP000146.2    | 0.024588  | 1.19623 Up-regulated in PsA    |
| LINC00933     | 0.0246308 | 0.959799 Down-regulated in PsA |
| RP11-118G23.1 | 0.0246321 | 1.48061 Up-regulated in PsA    |
| CHCHD3P2      | 0.0246387 | 0.925957 Down-regulated in PsA |
| RP11-439C8.2  | 0.0246765 | 1.22969 Up-regulated in PsA    |
| RP11-573C10.1 | 0.0247028 | 0.714487 Down-regulated in PsA |

|                |           |                                |
|----------------|-----------|--------------------------------|
| RP5-1186P10.1  | 0.024721  | 0.81078 Down-regulated in PsA  |
| RP11-818O24.3  | 0.0247592 | 1.20205 Up-regulated in PsA    |
| ADGRB1         | 0.0248141 | 0.756111 Down-regulated in PsA |
| NFX1           | 0.0248154 | 0.918611 Down-regulated in PsA |
| RN7SL503P      | 0.0248259 | 1.15273 Up-regulated in PsA    |
| AC073850.6     | 0.0248425 | 0.668475 Down-regulated in PsA |
| LPCAT2         | 0.0248742 | 0.845235 Down-regulated in PsA |
| RP5-1139B12.2  | 0.0249038 | 0.732346 Down-regulated in PsA |
| ATP6V1E1P1     | 0.0249053 | 0.710674 Down-regulated in PsA |
| FAM133A        | 0.0249471 | 0.890594 Down-regulated in PsA |
| MIRLET7D       | 0.024948  | 1.05153 Up-regulated in PsA    |
| UBE2B          | 0.0249508 | 0.838889 Down-regulated in PsA |
| RN7SKP107      | 0.0249678 | 1.12777 Up-regulated in PsA    |
| RP1-37N7.1     | 0.024983  | 1.37948 Up-regulated in PsA    |
| RP11-548K12.11 | 0.0249994 | 1.14882 Up-regulated in PsA    |
| COQ5           | 0.0250057 | 0.684918 Down-regulated in PsA |
| KNOP1          | 0.0250079 | 0.721083 Down-regulated in PsA |
| ZNF780A        | 0.0250212 | 0.7421 Down-regulated in PsA   |
| LINC00570      | 0.025058  | 0.831769 Down-regulated in PsA |
| RP11-439I14.3  | 0.0250766 | 1.69047 Up-regulated in PsA    |
| AIFM2          | 0.0251033 | 0.606723 Down-regulated in PsA |
| RP11-108K3.3   | 0.0251103 | 0.860336 Down-regulated in PsA |
| RP11-753D20.1  | 0.0251222 | 0.880294 Down-regulated in PsA |
| SETX           | 0.0251249 | 0.833471 Down-regulated in PsA |
| RNY4P29        | 0.0251254 | 1.36992 Up-regulated in PsA    |



|                |           |                                |
|----------------|-----------|--------------------------------|
| RP11-438F14.10 | 0.0251391 | 0.736269 Down-regulated in PsA |
| RP11-736G13.1  | 0.0251519 | 1.54641 Up-regulated in PsA    |
| OTOS           | 0.0251707 | 0.687846 Down-regulated in PsA |
| PYM1           | 0.0251732 | 0.801609 Down-regulated in PsA |
| NKIRAS1        | 0.0251781 | 0.739509 Down-regulated in PsA |
| COPS8P3        | 0.0251881 | 1.169 Up-regulated in PsA      |
| Y_RNA          | 0.0252196 | 0.924282 Down-regulated in PsA |
| AP000936.5     | 0.0252732 | 1.12528 Up-regulated in PsA    |
| RP11-1084E5.1  | 0.0252774 | 0.792784 Down-regulated in PsA |
| ZNFX1          | 0.0252954 | 0.881708 Down-regulated in PsA |
| PTRH2          | 0.0252962 | 0.781455 Down-regulated in PsA |
| STMN2          | 0.0253005 | 1.22278 Up-regulated in PsA    |
| TCEB1P6        | 0.0253123 | 1.32887 Up-regulated in PsA    |
| PAX1           | 0.0253181 | 0.852891 Down-regulated in PsA |
| RN7SL846P      | 0.025326  | 1.39802 Up-regulated in PsA    |
| LVCAT1         | 0.0253338 | 0.832261 Down-regulated in PsA |
| RPS4XP8        | 0.0253505 | 1.16413 Up-regulated in PsA    |
| MTCO1P24       | 0.0253692 | 1.20845 Up-regulated in PsA    |
| Y_RNA          | 0.0254193 | 0.864304 Down-regulated in PsA |
| TADA1          | 0.0254465 | 0.830386 Down-regulated in PsA |
| ARPC1A         | 0.0254641 | 0.822041 Down-regulated in PsA |
| ABCB10         | 0.0254679 | 0.710345 Down-regulated in PsA |
| RP11-356K22.1  | 0.0254805 | 0.629811 Down-regulated in PsA |
| RP11-10J5.1    | 0.0254991 | 1.32447 Up-regulated in PsA    |
| NT5DC4         | 0.0255009 | 1.17508 Up-regulated in PsA    |

|               |           |                                |
|---------------|-----------|--------------------------------|
| RP1-29C18.10  | 0.0255027 | 0.927091 Down-regulated in PsA |
| RNA5SP91      | 0.0255069 | 1.60243 Up-regulated in PsA    |
| MIR5586       | 0.0255328 | 0.760242 Down-regulated in PsA |
| PEX14         | 0.0255401 | 0.83238 Down-regulated in PsA  |
| USP9YP10      | 0.0255599 | 0.885965 Down-regulated in PsA |
| PRYP2         | 0.0255753 | 1.25925 Up-regulated in PsA    |
| CTA-221G9.7   | 0.0255833 | 0.763866 Down-regulated in PsA |
| CST4          | 0.0255972 | 0.670668 Down-regulated in PsA |
| RP11-208P4.1  | 0.025601  | 1.31574 Up-regulated in PsA    |
| TPI1P2        | 0.025604  | 0.912621 Down-regulated in PsA |
| FLJ43879      | 0.0256073 | 1.42896 Up-regulated in PsA    |
| RP11-214K3.24 | 0.0256654 | 0.721694 Down-regulated in PsA |
| LOC101928185  | 0.0256701 | 1.46035 Up-regulated in PsA    |
| MIR3617       | 0.0256819 | 1.05208 Up-regulated in PsA    |
| TCEB1P24      | 0.0257067 | 0.860143 Down-regulated in PsA |
| TCEB1P24      | 0.0257067 | 0.860143 Down-regulated in PsA |
| TAF7L         | 0.0257219 | 0.571551 Down-regulated in PsA |
| RP11-354E23.4 | 0.0257768 | 0.578613 Down-regulated in PsA |
| MLXIP         | 0.0257931 | 1.29247 Up-regulated in PsA    |
| MSRA          | 0.0258152 | 0.583873 Down-regulated in PsA |
| RP11-284F21.8 | 0.0258265 | 1.3871 Up-regulated in PsA     |
| TP53TG3D      | 0.0258519 | 0.874481 Down-regulated in PsA |
| KB-1183D5.16  | 0.0258745 | 0.800129 Down-regulated in PsA |
| MTATP6P23     | 0.0258782 | 1.5354 Up-regulated in PsA     |
| AC002551.1    | 0.0258869 | 0.704922 Down-regulated in PsA |

|               |           |                                |
|---------------|-----------|--------------------------------|
| CYP2D6        | 0.0258875 | 1.16377 Up-regulated in PsA    |
| GEMIN2P1      | 0.0258918 | 1.46831 Up-regulated in PsA    |
| RP5-849H19.2  | 0.025912  | 0.580426 Down-regulated in PsA |
| COX18         | 0.0259156 | 0.780325 Down-regulated in PsA |
| FMO5          | 0.025948  | 0.777368 Down-regulated in PsA |
| SNRPCP16      | 0.0259484 | 0.928079 Down-regulated in PsA |
| LOC285889     | 0.0259719 | 1.36448 Up-regulated in PsA    |
| ECT2L         | 0.0260312 | 0.922388 Down-regulated in PsA |
| TMEM206       | 0.0260321 | 0.576896 Down-regulated in PsA |
| OR4F16        | 0.0260584 | 0.891465 Down-regulated in PsA |
| OR4F29        | 0.0260584 | 0.891465 Down-regulated in PsA |
| GON4L         | 0.0260757 | 0.929237 Down-regulated in PsA |
| ZBTB47        | 0.026081  | 0.761047 Down-regulated in PsA |
| CRTC3         | 0.0261301 | 1.11511 Up-regulated in PsA    |
| SSPO          | 0.0261464 | 0.949878 Down-regulated in PsA |
| AC007679.4    | 0.0262022 | 1.16097 Up-regulated in PsA    |
| LRRC3C        | 0.0262287 | 0.671028 Down-regulated in PsA |
| FPGT-TNNI3K   | 0.0262443 | 0.532659 Down-regulated in PsA |
| MIR130B       | 0.0262519 | 1.13403 Up-regulated in PsA    |
| RP11-664I21.5 | 0.0262533 | 0.784596 Down-regulated in PsA |
| RP1-224A6.9   | 0.0262943 | 0.694483 Down-regulated in PsA |
| RP3-466P17.1  | 0.0263525 | 1.1625 Up-regulated in PsA     |
| STX3          | 0.0263538 | 0.70192 Down-regulated in PsA  |
| LOC100506125  | 0.0263598 | 1.32922 Up-regulated in PsA    |
| TIFA          | 0.0263636 | 0.467679 Down-regulated in PsA |

|               |           |                                |
|---------------|-----------|--------------------------------|
| GBX2          | 0.0263718 | 0.743228 Down-regulated in PsA |
| LPAR5         | 0.026375  | 1.20303 Up-regulated in PsA    |
| F2R           | 0.0263776 | 1.25958 Up-regulated in PsA    |
| OR11J2P       | 0.026387  | 1.32433 Up-regulated in PsA    |
| RP11-452L6.7  | 0.0263891 | 1.05424 Up-regulated in PsA    |
| MDFIC         | 0.0264065 | 0.808846 Down-regulated in PsA |
| RP11-174O3.1  | 0.0264297 | 1.20545 Up-regulated in PsA    |
| CTD-2651B20.5 | 0.0264424 | 1.25469 Up-regulated in PsA    |
| KRT81         | 0.0264549 | 1.15543 Up-regulated in PsA    |
| EMC4          | 0.0264744 | 0.871647 Down-regulated in PsA |
| FGFR3P6       | 0.0264762 | 0.827893 Down-regulated in PsA |
| NANOG         | 0.0265263 | 0.751676 Down-regulated in PsA |
| LRRC19        | 0.0265431 | 0.617696 Down-regulated in PsA |
| RBBP4         | 0.026559  | 0.810373 Down-regulated in PsA |
| MIR548A1      | 0.0265812 | 0.93246 Down-regulated in PsA  |
| RP11-3D4.2    | 0.0265879 | 1.28936 Up-regulated in PsA    |
| AC011754.1    | 0.0265991 | 0.846031 Down-regulated in PsA |
| REV3L         | 0.0265995 | 0.822068 Down-regulated in PsA |
| KRTAP25-1     | 0.0266287 | 0.763736 Down-regulated in PsA |
| RP11-166B2.5  | 0.0266416 | 0.946366 Down-regulated in PsA |
| LRIT2         | 0.0266521 | 0.85477 Down-regulated in PsA  |
| SNORA25       | 0.0266679 | 0.675344 Down-regulated in PsA |
| RP11-427P5.2  | 0.026678  | 1.69394 Up-regulated in PsA    |
| SNORA71C      | 0.0266949 | 1.26683 Up-regulated in PsA    |
| ETFA          | 0.026709  | 0.733876 Down-regulated in PsA |

|               |           |                                |
|---------------|-----------|--------------------------------|
| RP11-449D8.5  | 0.0267207 | 0.822571 Down-regulated in PsA |
| KCNQ5-AS1     | 0.0267282 | 0.813722 Down-regulated in PsA |
| PCED1CP       | 0.0267423 | 1.45987 Up-regulated in PsA    |
| MRGPRD        | 0.0267452 | 0.912701 Down-regulated in PsA |
| HIGD1AP10     | 0.0267736 | 0.801529 Down-regulated in PsA |
| EXOSC2        | 0.0267826 | 0.702928 Down-regulated in PsA |
| Y_RNA         | 0.0268032 | 1.26208 Up-regulated in PsA    |
| LOC100288069  | 0.0268213 | 0.953096 Down-regulated in PsA |
| RP11-149I23.3 | 0.0268229 | 0.875428 Down-regulated in PsA |
| Y_RNA         | 0.0268295 | 1.35691 Up-regulated in PsA    |
| HMG2N2P11     | 0.026836  | 1.34961 Up-regulated in PsA    |
| TOLLIP        | 0.026869  | 0.932847 Down-regulated in PsA |
| AC084121.14   | 0.0269163 | 0.86359 Down-regulated in PsA  |
| VCP           | 0.0269527 | 0.875878 Down-regulated in PsA |
| AC007271.3    | 0.026982  | 1.56888 Up-regulated in PsA    |
| TUBBP9        | 0.0269904 | 0.945648 Down-regulated in PsA |
| AC159540.3    | 0.0269949 | 0.925802 Down-regulated in PsA |
| PRB2          | 0.027003  | 0.871562 Down-regulated in PsA |
| RP11-127L20.5 | 0.0270321 | 0.890788 Down-regulated in PsA |
| ENPP7P9       | 0.0270392 | 0.971643 Down-regulated in PsA |
| MIR6859-3     | 0.0270564 | 1.24652 Up-regulated in PsA    |
| Y_RNA         | 0.0270576 | 1.03406 Up-regulated in PsA    |
| RP1-20N2.7    | 0.0270852 | 0.85247 Down-regulated in PsA  |
| ZNF502        | 0.0270893 | 0.595178 Down-regulated in PsA |
| GTF2IP20      | 0.0271268 | 1.088 Up-regulated in PsA      |

|               |           |                                |
|---------------|-----------|--------------------------------|
| MIR5091       | 0.0272064 | 1.30949 Up-regulated in PsA    |
| RP11-277L2.5  | 0.02722   | 0.818339 Down-regulated in PsA |
| SLC22A10      | 0.0272202 | 0.780758 Down-regulated in PsA |
| OR4F21        | 0.027222  | 0.66156 Down-regulated in PsA  |
| PHF1          | 0.0272347 | 1.49184 Up-regulated in PsA    |
| TMEM187       | 0.0272518 | 0.544177 Down-regulated in PsA |
| RP11-549B18.1 | 0.0272645 | 1.69588 Up-regulated in PsA    |
| EYA3          | 0.0272809 | 0.626811 Down-regulated in PsA |
| MIR3142       | 0.0273077 | 0.691587 Down-regulated in PsA |
| A2ML1         | 0.0273818 | 1.42429 Up-regulated in PsA    |
| TTC31         | 0.0273915 | 0.891345 Down-regulated in PsA |
| PTPN6         | 0.0274019 | 0.932324 Down-regulated in PsA |
| RP4-575N6.2   | 0.027409  | 0.8747 Down-regulated in PsA   |
| SETDB2        | 0.0274278 | 0.611784 Down-regulated in PsA |
| C8orf4        | 0.0274338 | 0.829524 Down-regulated in PsA |
| TMEM59        | 0.0274342 | 0.861872 Down-regulated in PsA |
| RP11-258O13.1 | 0.0274434 | 0.859974 Down-regulated in PsA |
| RP11-362I1.1  | 0.0274736 | 1.08873 Up-regulated in PsA    |
| PARP11        | 0.0274743 | 0.89469 Down-regulated in PsA  |
| LOC101927709  | 0.0274812 | 0.855077 Down-regulated in PsA |
| Metazoa_SRP   | 0.0274845 | 1.21149 Up-regulated in PsA    |
| GTF2A2        | 0.0274993 | 0.778801 Down-regulated in PsA |
| GLRXP         | 0.0275584 | 0.793597 Down-regulated in PsA |
| ZFYVE21       | 0.0275952 | 0.661383 Down-regulated in PsA |
| RP11-428G5.5  | 0.0276237 | 0.393978 Down-regulated in PsA |

|               |           |                                |
|---------------|-----------|--------------------------------|
| CTC-471J1.2   | 0.027641  | 1.42474 Up-regulated in PsA    |
| AP001610.9    | 0.027645  | 1.28297 Up-regulated in PsA    |
| TDGF1P4       | 0.0276451 | 1.21844 Up-regulated in PsA    |
| CTD-3113P16.5 | 0.0276527 | 1.21828 Up-regulated in PsA    |
| TRIM43CP      | 0.0276697 | 1.16386 Up-regulated in PsA    |
| LOC100130673  | 0.0277232 | 0.787142 Down-regulated in PsA |
| ADM5          | 0.0277844 | 0.794077 Down-regulated in PsA |
| AF241725.6    | 0.0277845 | 1.59433 Up-regulated in PsA    |
| PNPLA7        | 0.0277848 | 1.10652 Up-regulated in PsA    |
| ITM2C         | 0.0278157 | 1.56698 Up-regulated in PsA    |
| RN7SL783P     | 0.0278159 | 1.3157 Up-regulated in PsA     |
| CLEC1B        | 0.0278305 | 1.28833 Up-regulated in PsA    |
| RPS6KB1       | 0.027839  | 0.871189 Down-regulated in PsA |
| ARHGEF6       | 0.0278465 | 0.908134 Down-regulated in PsA |
| AL133249.1    | 0.0278528 | 0.834069 Down-regulated in PsA |
| Metazoa_SRP   | 0.0278556 | 1.1538 Up-regulated in PsA     |
| LOC401242     | 0.027886  | 1.23745 Up-regulated in PsA    |
| SPRYD4        | 0.0278927 | 0.868637 Down-regulated in PsA |
| RP11-296C13.1 | 0.0278938 | 1.23765 Up-regulated in PsA    |
| LINC00443     | 0.0278995 | 1.30438 Up-regulated in PsA    |
| RP11-314P15.2 | 0.027919  | 1.19065 Up-regulated in PsA    |
| NPM3          | 0.0279217 | 1.24856 Up-regulated in PsA    |
| GAPDHP41      | 0.0279231 | 1.3011 Up-regulated in PsA     |
| Metazoa_SRP   | 0.0279233 | 1.4054 Up-regulated in PsA     |
| RP11-687M24.7 | 0.0279395 | 1.21459 Up-regulated in PsA    |

|                  |           |                                |
|------------------|-----------|--------------------------------|
| XX-FYM637E10_5.1 | 0.0279553 | 1.29654 Up-regulated in PsA    |
| RP11-191F9.1     | 0.0279568 | 1.15252 Up-regulated in PsA    |
| ZNF565           | 0.0279615 | 0.643019 Down-regulated in PsA |
| RP4-800M22.4     | 0.0279987 | 1.41286 Up-regulated in PsA    |
| RP11-813F20.4    | 0.0280118 | 1.27494 Up-regulated in PsA    |
| AC010900.2       | 0.0280383 | 1.13821 Up-regulated in PsA    |
| SLC16A14P1       | 0.0280571 | 1.43636 Up-regulated in PsA    |
| GS1-164F24.1     | 0.0280918 | 1.13454 Up-regulated in PsA    |
| ABL1             | 0.0280937 | 0.839297 Down-regulated in PsA |
| STAC3            | 0.028132  | 0.679899 Down-regulated in PsA |
| AC008982.2       | 0.0281377 | 0.882196 Down-regulated in PsA |
| RP11-486A14.1    | 0.0281598 | 1.47715 Up-regulated in PsA    |
| ANP32C           | 0.0281603 | 0.887853 Down-regulated in PsA |
| LOC101928438     | 0.0281724 | 1.18278 Up-regulated in PsA    |
| HOTAIR           | 0.0281778 | 1.12547 Up-regulated in PsA    |
| CH17-248H7.3     | 0.0281923 | 1.31413 Up-regulated in PsA    |
| RP11-722M1.1     | 0.0282    | 1.36973 Up-regulated in PsA    |
| CTD-2332E11.2    | 0.0282277 | 1.18874 Up-regulated in PsA    |
| RN7SKP58         | 0.0282572 | 1.28731 Up-regulated in PsA    |
| SOHLH1           | 0.0282599 | 1.06728 Up-regulated in PsA    |
| ETV5-AS1         | 0.0282713 | 0.758833 Down-regulated in PsA |
| PDSS2            | 0.0282836 | 0.598606 Down-regulated in PsA |
| MTCYBP12         | 0.0282994 | 0.880778 Down-regulated in PsA |
| SRGAP3-AS1       | 0.0283042 | 1.31726 Up-regulated in PsA    |
| OR2AE1           | 0.0283188 | 1.36154 Up-regulated in PsA    |



|               |           |                                |
|---------------|-----------|--------------------------------|
| RPL27AP8      | 0.0283289 | 1.10022 Up-regulated in PsA    |
| GNS           | 0.0283289 | 0.870387 Down-regulated in PsA |
| RP11-200A1.1  | 0.0283406 | 1.31243 Up-regulated in PsA    |
| AADACL2       | 0.0283423 | 1.0773 Up-regulated in PsA     |
| ATP11A        | 0.0283456 | 1.16628 Up-regulated in PsA    |
| AHCY          | 0.0283717 | 1.0857 Up-regulated in PsA     |
| RP5-1168A5.1  | 0.028377  | 0.641485 Down-regulated in PsA |
| RN7SL65P      | 0.0283778 | 1.29731 Up-regulated in PsA    |
| AC079834.1    | 0.0283831 | 0.963432 Down-regulated in PsA |
| MIR3166       | 0.0283928 | 0.809189 Down-regulated in PsA |
| NDUFB4P11     | 0.0283933 | 0.468631 Down-regulated in PsA |
| RP1-149A16.12 | 0.0284103 | 1.56359 Up-regulated in PsA    |
| RP11-389O22.1 | 0.0284185 | 0.639135 Down-regulated in PsA |
| DDX20         | 0.0284318 | 0.885644 Down-regulated in PsA |
| EN2           | 0.0284382 | 0.82109 Down-regulated in PsA  |
| AC026150.8    | 0.0284563 | 0.565192 Down-regulated in PsA |
| NDUFA4L2      | 0.0284652 | 1.57974 Up-regulated in PsA    |
| MDC1-AS1      | 0.0285007 | 0.808223 Down-regulated in PsA |
| RP11-455I9.1  | 0.028502  | 0.747708 Down-regulated in PsA |
| RP11-562A8.4  | 0.0285537 | 1.17888 Up-regulated in PsA    |
| PTPN2P1       | 0.0285775 | 0.798945 Down-regulated in PsA |
| THAP10        | 0.0285842 | 0.75107 Down-regulated in PsA  |
| EIF3H         | 0.0286019 | 0.931505 Down-regulated in PsA |
| IGSF6         | 0.0286065 | 0.752011 Down-regulated in PsA |
| OR2B4P        | 0.0286317 | 0.663047 Down-regulated in PsA |

|               |           |                                |
|---------------|-----------|--------------------------------|
| KCTD1         | 0.0286354 | 0.908403 Down-regulated in PsA |
| RP11-578F21.9 | 0.0286435 | 1.31371 Up-regulated in PsA    |
| CORO2B        | 0.0286519 | 0.658305 Down-regulated in PsA |
| RP11-158L12.5 | 0.0286602 | 1.60713 Up-regulated in PsA    |
| TNPO3         | 0.0286655 | 0.826266 Down-regulated in PsA |
| BECN2         | 0.0286663 | 1.21516 Up-regulated in PsA    |
| RPS27         | 0.0286668 | 1.08849 Up-regulated in PsA    |
| RPL23AP96     | 0.0286914 | 1.55137 Up-regulated in PsA    |
| ZNF197        | 0.0287205 | 1.2335 Up-regulated in PsA     |
| RP11-230L22.4 | 0.0287238 | 0.633238 Down-regulated in PsA |
| ACAT2         | 0.0287676 | 0.766119 Down-regulated in PsA |
| RP11-397G5.2  | 0.0287857 | 0.828732 Down-regulated in PsA |
| NDUFA5P5      | 0.0287875 | 0.708542 Down-regulated in PsA |
| PHOSPHO2      | 0.0287922 | 0.433209 Down-regulated in PsA |
| LINC00618     | 0.0288098 | 1.48627 Up-regulated in PsA    |
| HSPA8P9       | 0.0288106 | 0.773773 Down-regulated in PsA |
| FCRL5         | 0.0288295 | 1.33605 Up-regulated in PsA    |
| TUBBP6        | 0.0288411 | 1.1998 Up-regulated in PsA     |
| RP13-395E19.2 | 0.0288576 | 1.05183 Up-regulated in PsA    |
| ARPC3P2       | 0.0289052 | 0.730136 Down-regulated in PsA |
| FAM153B       | 0.0289134 | 0.676033 Down-regulated in PsA |
| RNU6-373P     | 0.0289159 | 1.35824 Up-regulated in PsA    |
| TCEB3         | 0.0289215 | 0.726596 Down-regulated in PsA |
| HOTAIR_5      | 0.0289253 | 0.656074 Down-regulated in PsA |
| AC011330.5    | 0.0289363 | 1.66414 Up-regulated in PsA    |

[illegible]

|              |           |                                |
|--------------|-----------|--------------------------------|
| pRNA         | 0.0292411 | 1.18617 Up-regulated in PsA    |
| AC010105.1   | 0.0292447 | 1.2208 Up-regulated in PsA     |
| RBBP6        | 0.0292596 | 1.04532 Up-regulated in PsA    |
| FABP4        | 0.0292662 | 1.42293 Up-regulated in PsA    |
| MYO1F        | 0.0292756 | 0.973677 Down-regulated in PsA |
| AC013444.1   | 0.0292863 | 1.87952 Up-regulated in PsA    |
| USP9YP22     | 0.0292946 | 1.09275 Up-regulated in PsA    |
| TF           | 0.0293032 | 1.58088 Up-regulated in PsA    |
| RP11-502F1.2 | 0.0293033 | 0.8149 Down-regulated in PsA   |
| RPS3AP33     | 0.0293229 | 1.11286 Up-regulated in PsA    |
| STAT6        | 0.0293369 | 0.87496 Down-regulated in PsA  |
| LOC101927229 | 0.0293652 | 1.20422 Up-regulated in PsA    |
| RP5-857K21.4 | 0.0293876 | 0.709808 Down-regulated in PsA |
| USP53        | 0.0293926 | 0.549341 Down-regulated in PsA |
| ZNF563       | 0.0294181 | 0.73171 Down-regulated in PsA  |
| AP001619.3   | 0.0294504 | 1.10521 Up-regulated in PsA    |
| AATK-AS1     | 0.029461  | 1.31231 Up-regulated in PsA    |
| TAAR8        | 0.0294726 | 1.21888 Up-regulated in PsA    |
| RPS23P9      | 0.0294728 | 1.6951 Up-regulated in PsA     |
| RP11-64C12.7 | 0.0295545 | 0.869227 Down-regulated in PsA |
| RN7SKP77     | 0.0295633 | 0.780073 Down-regulated in PsA |
| SNORA28      | 0.0295688 | 1.08937 Up-regulated in PsA    |
| BICD1        | 0.0296067 | 0.690598 Down-regulated in PsA |
| MEGF9        | 0.0296217 | 0.812021 Down-regulated in PsA |
| RP3-417O22.3 | 0.0296269 | 0.676436 Down-regulated in PsA |

|               |           |                                |
|---------------|-----------|--------------------------------|
| CTD-3126B10.5 | 0.0296339 | 0.799924 Down-regulated in PsA |
| PPP2R3C       | 0.0296456 | 0.755015 Down-regulated in PsA |
| UBE2N         | 0.0296831 | 0.726415 Down-regulated in PsA |
| RP11-360A18.2 | 0.029686  | 0.87159 Down-regulated in PsA  |
| LINC01613     | 0.029686  | 0.87159 Down-regulated in PsA  |
| RP1-8B22.2    | 0.0296998 | 0.793048 Down-regulated in PsA |
| RP11-467J12.2 | 0.0297035 | 1.07691 Up-regulated in PsA    |
| AP000343.1    | 0.0297238 | 1.15148 Up-regulated in PsA    |
| KCTD9P3       | 0.0297371 | 0.781694 Down-regulated in PsA |
| REXO4         | 0.0297897 | 0.842787 Down-regulated in PsA |
| DCAF13        | 0.0298042 | 0.679423 Down-regulated in PsA |
| RP11-593F5.1  | 0.0298145 | 0.848856 Down-regulated in PsA |
| BCAR1P2       | 0.0298221 | 1.17623 Up-regulated in PsA    |
| NPAT          | 0.0298435 | 0.665063 Down-regulated in PsA |
| RP11-447M4.1  | 0.0298449 | 1.29704 Up-regulated in PsA    |
| PLAC8L1       | 0.0299087 | 0.777428 Down-regulated in PsA |
| ARAP2         | 0.0299221 | 1.85078 Up-regulated in PsA    |
| SLTM          | 0.0299302 | 0.833988 Down-regulated in PsA |
| LOC101927464  | 0.0299323 | 1.15338 Up-regulated in PsA    |
| RN7SL254P     | 0.029937  | 1.16254 Up-regulated in PsA    |
| RP11-973D8.4  | 0.0299387 | 1.65543 Up-regulated in PsA    |
| PTP4A1P1      | 0.0299667 | 0.759061 Down-regulated in PsA |
| OR52A1        | 0.0299865 | 0.681623 Down-regulated in PsA |
| RNF8          | 0.029993  | 0.564927 Down-regulated in PsA |
| CYP27C1       | 0.0299953 | 0.531588 Down-regulated in PsA |

|               |           |                                |
|---------------|-----------|--------------------------------|
| RN7SL443P     | 0.0300038 | 1.18801 Up-regulated in PsA    |
| BNIP3P1       | 0.0300093 | 0.857765 Down-regulated in PsA |
| PRKCB         | 0.0300152 | 0.749898 Down-regulated in PsA |
| AC140725.8    | 0.0300319 | 0.585401 Down-regulated in PsA |
| RP11-3P17.5   | 0.0300617 | 1.09018 Up-regulated in PsA    |
| RP11-111A22.1 | 0.0300681 | 1.14114 Up-regulated in PsA    |
| LDHBP1        | 0.0300849 | 1.41683 Up-regulated in PsA    |
| CTC-428G20.3  | 0.0300866 | 0.700221 Down-regulated in PsA |
| CKAP5         | 0.0301508 | 0.767726 Down-regulated in PsA |
| STIL          | 0.0301606 | 0.54504 Down-regulated in PsA  |
| SETP15        | 0.0301891 | 0.839559 Down-regulated in PsA |
| RMDN1         | 0.0302192 | 0.851111 Down-regulated in PsA |
| RP11-692D12.1 | 0.030239  | 0.704216 Down-regulated in PsA |
| FAM69B        | 0.0302497 | 0.79661 Down-regulated in PsA  |
| PLCXD3        | 0.0302517 | 1.29565 Up-regulated in PsA    |
| EIF4HP1       | 0.0302625 | 0.848271 Down-regulated in PsA |
| SNORA40       | 0.0302734 | 0.817037 Down-regulated in PsA |
| GUCY1A3       | 0.0303313 | 0.656245 Down-regulated in PsA |
| AC024162.2    | 0.0303407 | 0.880282 Down-regulated in PsA |
| RP11-622J8.1  | 0.030362  | 1.18808 Up-regulated in PsA    |
| HSPH1         | 0.0303726 | 0.636086 Down-regulated in PsA |
| AC005614.5    | 0.0303922 | 0.645566 Down-regulated in PsA |
| AC019097.7    | 0.030403  | 0.762053 Down-regulated in PsA |
| RP11-365D23.4 | 0.0304143 | 2.20167 Up-regulated in PsA    |
| RN7SL188P     | 0.0304171 | 1.16726 Up-regulated in PsA    |

|               |           |                                |
|---------------|-----------|--------------------------------|
| Y_RNA         | 0.0304223 | 0.897798 Down-regulated in PsA |
| RPL35AP4      | 0.0304581 | 1.25277 Up-regulated in PsA    |
| DUS3L         | 0.0304645 | 1.12662 Up-regulated in PsA    |
| RP13-895J2.10 | 0.0304843 | 1.19541 Up-regulated in PsA    |
| RP11-475O23.2 | 0.0304891 | 1.17124 Up-regulated in PsA    |
| TCEB1P17      | 0.0305193 | 1.25207 Up-regulated in PsA    |
| MIR32         | 0.0305207 | 0.680902 Down-regulated in PsA |
| GPR137B       | 0.0305335 | 0.828291 Down-regulated in PsA |
| PMVK          | 0.0305765 | 0.72285 Down-regulated in PsA  |
| RP11-608B3.1  | 0.0306025 | 0.876085 Down-regulated in PsA |
| MIR99A        | 0.0306217 | 1.24181 Up-regulated in PsA    |
| BDP1          | 0.0306332 | 0.690277 Down-regulated in PsA |
| CTD-2008E3.1  | 0.0306346 | 0.946109 Down-regulated in PsA |
| GART          | 0.0306388 | 0.710546 Down-regulated in PsA |
| RN7SL448P     | 0.0306407 | 1.19156 Up-regulated in PsA    |
| ZBTB46-AS1    | 0.0306434 | 1.03264 Up-regulated in PsA    |
| RP11-526K21.2 | 0.0306512 | 1.40971 Up-regulated in PsA    |
| DHODH         | 0.0306555 | 0.787522 Down-regulated in PsA |
| RPL12P9       | 0.0306807 | 0.81202 Down-regulated in PsA  |
| RP5-1164C1.2  | 0.0306882 | 1.28634 Up-regulated in PsA    |
| RP11-96D1.8   | 0.0306925 | 1.11105 Up-regulated in PsA    |
| DOK4          | 0.0307333 | 0.632465 Down-regulated in PsA |
| AC019185.2    | 0.0307591 | 0.842503 Down-regulated in PsA |
| OR4N1P        | 0.0307853 | 1.249 Up-regulated in PsA      |
| RP11-302K17.3 | 0.030844  | 1.18302 Up-regulated in PsA    |

|               |           |                                |
|---------------|-----------|--------------------------------|
| COL18A1       | 0.0308463 | 1.12259 Up-regulated in PsA    |
| USP34         | 0.0308637 | 0.785467 Down-regulated in PsA |
| RP11-321E2.9  | 0.030866  | 1.46135 Up-regulated in PsA    |
| TRIM26        | 0.0308919 | 0.806126 Down-regulated in PsA |
| MIR532        | 0.0308979 | 1.34771 Up-regulated in PsA    |
| RP11-893F2.14 | 0.030905  | 1.24709 Up-regulated in PsA    |
| BRICD5        | 0.0309054 | 1.35044 Up-regulated in PsA    |
| RN7SL68P      | 0.0309483 | 0.773253 Down-regulated in PsA |
| SMIM10L2B     | 0.0309575 | 1.16447 Up-regulated in PsA    |
| TRIM50        | 0.0309974 | 0.852604 Down-regulated in PsA |
| PARP1P1       | 0.0310399 | 0.81188 Down-regulated in PsA  |
| CDH18         | 0.0310434 | 1.44564 Up-regulated in PsA    |
| USP45         | 0.0310706 | 0.55508 Down-regulated in PsA  |
| MIR3147       | 0.0310801 | 1.26009 Up-regulated in PsA    |
| RP11-395N3.1  | 0.0311183 | 1.19532 Up-regulated in PsA    |
| RP11-178H8.2  | 0.031129  | 1.14057 Up-regulated in PsA    |
| BTN2A1        | 0.0311635 | 0.700908 Down-regulated in PsA |
| ALAD          | 0.0312111 | 0.885269 Down-regulated in PsA |
| CLECL1        | 0.0312379 | 2.62436 Up-regulated in PsA    |
| ZNF540        | 0.0312529 | 0.752473 Down-regulated in PsA |
| KCCAT333      | 0.0312589 | 1.93481 Up-regulated in PsA    |
| RP11-108M9.5  | 0.0312693 | 1.26263 Up-regulated in PsA    |
| LOC102723604  | 0.0312729 | 1.49245 Up-regulated in PsA    |
| KRT39         | 0.0312989 | 0.690348 Down-regulated in PsA |
| LENG8         | 0.0313029 | 0.951066 Down-regulated in PsA |



|                  |           |                                |
|------------------|-----------|--------------------------------|
| RPSAP5           | 0.0313218 | 0.864886 Down-regulated in PsA |
| MIR4478          | 0.0313347 | 1.26094 Up-regulated in PsA    |
| CITED4           | 0.0313557 | 0.906853 Down-regulated in PsA |
| DBIL5P2          | 0.0313625 | 1.38083 Up-regulated in PsA    |
| MTCO1P45         | 0.0313634 | 1.20027 Up-regulated in PsA    |
| RP11-1018N14.5   | 0.0313751 | 0.828515 Down-regulated in PsA |
| RP11-493L12.3    | 0.0314052 | 1.3897 Up-regulated in PsA     |
| RP11-454L9.2     | 0.0314054 | 1.20373 Up-regulated in PsA    |
| BUD31P1          | 0.0314354 | 1.20722 Up-regulated in PsA    |
| NSFL1C           | 0.0314397 | 0.860885 Down-regulated in PsA |
| RP11-486M3.2     | 0.0314673 | 1.263 Up-regulated in PsA      |
| OR7D2            | 0.0314766 | 0.869379 Down-regulated in PsA |
| LILRA2           | 0.0314887 | 0.831533 Down-regulated in PsA |
| ZCCHC9           | 0.0315007 | 0.84113 Down-regulated in PsA  |
| HERC2P3          | 0.0315029 | 0.525553 Down-regulated in PsA |
| RP13-157F18.2    | 0.0315131 | 0.824122 Down-regulated in PsA |
| KB-1517D11.2     | 0.0315148 | 0.634883 Down-regulated in PsA |
| RN7SL420P        | 0.0315271 | 1.17681 Up-regulated in PsA    |
| RP11-124N14.3    | 0.0315305 | 1.16529 Up-regulated in PsA    |
| CTC-241F20.4     | 0.0315746 | 1.4836 Up-regulated in PsA     |
| EFCAB11          | 0.0315864 | 0.512265 Down-regulated in PsA |
| XXbac-B476C20.11 | 0.0316131 | 1.14651 Up-regulated in PsA    |
| CLYBL-AS1        | 0.0316203 | 1.70447 Up-regulated in PsA    |
| DHX16            | 0.0316207 | 0.805608 Down-regulated in PsA |
| PCYT1A           | 0.0316271 | 0.775337 Down-regulated in PsA |

|               |           |                                |
|---------------|-----------|--------------------------------|
| TTC30B        | 0.0316319 | 0.67543 Down-regulated in PsA  |
| ADRA1B        | 0.0316557 | 0.67581 Down-regulated in PsA  |
| OR5D3P        | 0.0316625 | 1.25272 Up-regulated in PsA    |
| DRD1          | 0.0316958 | 0.803064 Down-regulated in PsA |
| Six3os1_1     | 0.03171   | 1.21205 Up-regulated in PsA    |
| RPL7P40       | 0.0317448 | 0.69346 Down-regulated in PsA  |
| ZNF404        | 0.0317512 | 0.858093 Down-regulated in PsA |
| KLC3          | 0.0317692 | 0.929041 Down-regulated in PsA |
| TBL1XR1       | 0.0317779 | 0.666592 Down-regulated in PsA |
| CTD-3184A7.4  | 0.0318083 | 1.28768 Up-regulated in PsA    |
| KCNT1         | 0.0318147 | 0.776282 Down-regulated in PsA |
| ZNF32         | 0.0318155 | 0.87633 Down-regulated in PsA  |
| RP11-492L8.1  | 0.0318518 | 1.33294 Up-regulated in PsA    |
| RP11-368M16.3 | 0.0318638 | 0.881112 Down-regulated in PsA |
| WDR86-AS1     | 0.0318707 | 1.19775 Up-regulated in PsA    |
| AC254560.1    | 0.0319208 | 0.958509 Down-regulated in PsA |
| AGAP1-IT1     | 0.0319249 | 1.27101 Up-regulated in PsA    |
| HNRNPA1P63    | 0.0319398 | 0.681051 Down-regulated in PsA |
| RP1-303A1.1   | 0.0319559 | 1.40721 Up-regulated in PsA    |
| MRPS33        | 0.0319614 | 0.918318 Down-regulated in PsA |
| RP11-5C23.2   | 0.0319849 | 0.818671 Down-regulated in PsA |
| CCDC28A       | 0.0320065 | 0.772925 Down-regulated in PsA |
| ASCL4         | 0.0320157 | 0.743518 Down-regulated in PsA |
| CH17-258A22.4 | 0.0320265 | 0.789003 Down-regulated in PsA |
| RP11-989E6.13 | 0.0320463 | 1.26582 Up-regulated in PsA    |

|                |           |                                |
|----------------|-----------|--------------------------------|
| AC092569.2     | 0.0320762 | 1.44714 Up-regulated in PsA    |
| PPARGC1B       | 0.0320831 | 0.813003 Down-regulated in PsA |
| MRPS31P5       | 0.032108  | 1.24451 Up-regulated in PsA    |
| C1orf74        | 0.0321508 | 0.804788 Down-regulated in PsA |
| KIF6           | 0.0321572 | 1.23915 Up-regulated in PsA    |
| MECP2          | 0.0321706 | 0.895887 Down-regulated in PsA |
| RP11-644F5.15  | 0.0321793 | 1.4198 Up-regulated in PsA     |
| UMOD           | 0.032191  | 1.35733 Up-regulated in PsA    |
| ADRB1          | 0.0321996 | 0.87253 Down-regulated in PsA  |
| AVIL           | 0.0322069 | 0.834623 Down-regulated in PsA |
| HTR3D          | 0.0322244 | 1.25511 Up-regulated in PsA    |
| NDUFAF1        | 0.0322305 | 0.689817 Down-regulated in PsA |
| SLC2A1         | 0.0322309 | 1.51801 Up-regulated in PsA    |
| RN7SKP230      | 0.0322538 | 1.14442 Up-regulated in PsA    |
| CTD-2561B21.10 | 0.032286  | 1.37345 Up-regulated in PsA    |
| ADGRF4         | 0.0322956 | 0.750437 Down-regulated in PsA |
| CTD-3118D11.3  | 0.0322995 | 0.607172 Down-regulated in PsA |
| RP11-325O24.1  | 0.0323329 | 0.659196 Down-regulated in PsA |
| CCBL1          | 0.0323465 | 0.75914 Down-regulated in PsA  |
| LOC389602      | 0.0323665 | 0.877768 Down-regulated in PsA |
| LA16c-17H1.3   | 0.0323703 | 0.789364 Down-regulated in PsA |
| MRPL38         | 0.0323897 | 1.15543 Up-regulated in PsA    |
| MIR6782        | 0.032478  | 1.07685 Up-regulated in PsA    |
| KRTAP5-7       | 0.0324992 | 1.11447 Up-regulated in PsA    |
| DARS-AS1       | 0.0325213 | 0.81582 Down-regulated in PsA  |

|                |           |                                |
|----------------|-----------|--------------------------------|
| RP11-355K23B.1 | 0.0325225 | 1.19434 Up-regulated in PsA    |
| CUZD1          | 0.0325455 | 0.839599 Down-regulated in PsA |
| MIR371B        | 0.0325731 | 0.549336 Down-regulated in PsA |
| RP11-94C24.6   | 0.0325834 | 1.21592 Up-regulated in PsA    |
| PPIL1          | 0.0325896 | 0.70441 Down-regulated in PsA  |
| CHRNA7         | 0.0327134 | 1.11198 Up-regulated in PsA    |
| RP11-608O8.2   | 0.0327687 | 1.12451 Up-regulated in PsA    |
| KB-1299A7.2    | 0.0328241 | 1.42979 Up-regulated in PsA    |
| RP11-556H2.3   | 0.0328302 | 1.33215 Up-regulated in PsA    |
| NPHS2          | 0.0328324 | 0.910705 Down-regulated in PsA |
| FAM109B        | 0.0328351 | 0.874956 Down-regulated in PsA |
| BNIP3P32       | 0.03286   | 1.25018 Up-regulated in PsA    |
| MOB1A          | 0.03286   | 0.871803 Down-regulated in PsA |
| CPNE8          | 0.032879  | 0.861782 Down-regulated in PsA |
| RBBP4P5        | 0.032884  | 0.784564 Down-regulated in PsA |
| COIL           | 0.0328872 | 0.763129 Down-regulated in PsA |
| CTC-428G20.2   | 0.0328904 | 1.31969 Up-regulated in PsA    |
| SLC30A6        | 0.032897  | 0.768241 Down-regulated in PsA |
| NUCKS1P1       | 0.0329141 | 1.29863 Up-regulated in PsA    |
| SPATA22        | 0.0329222 | 0.485654 Down-regulated in PsA |
| AC073115.6     | 0.0329258 | 1.53792 Up-regulated in PsA    |
| RP4-665N4.4    | 0.0329305 | 1.19898 Up-regulated in PsA    |
| GFER           | 0.0329331 | 1.34332 Up-regulated in PsA    |
| NT5E           | 0.0329396 | 0.84031 Down-regulated in PsA  |
| LEO1           | 0.0329842 | 0.624464 Down-regulated in PsA |

|               |           |                                |
|---------------|-----------|--------------------------------|
| RP11-407A16.8 | 0.0329997 | 0.806788 Down-regulated in PsA |
| RP11-795H16.3 | 0.0330265 | 0.722732 Down-regulated in PsA |
| LOC100652768  | 0.0330365 | 0.865339 Down-regulated in PsA |
| ASS1P1        | 0.0330623 | 1.13 Up-regulated in PsA       |
| DTNA          | 0.0330685 | 0.555095 Down-regulated in PsA |
| EVA1C         | 0.0330768 | 1.09558 Up-regulated in PsA    |
| CTD-2396E7.7  | 0.0330873 | 1.23178 Up-regulated in PsA    |
| PDRG1         | 0.0330897 | 0.83748 Down-regulated in PsA  |
| RP5-845O24.8  | 0.03309   | 1.37085 Up-regulated in PsA    |
| Y_RNA         | 0.0331134 | 1.40406 Up-regulated in PsA    |
| SNORD87       | 0.0331141 | 0.850836 Down-regulated in PsA |
| AC093074.1    | 0.0331156 | 0.860503 Down-regulated in PsA |
| DEFA4         | 0.0331501 | 0.863931 Down-regulated in PsA |
| LOC101928441  | 0.0331745 | 1.30645 Up-regulated in PsA    |
| FRYL          | 0.0331854 | 0.891533 Down-regulated in PsA |
| SHANK3        | 0.0332205 | 0.838114 Down-regulated in PsA |
| CERS2         | 0.0332323 | 0.868363 Down-regulated in PsA |
| RP11-404P21.9 | 0.0332684 | 1.1352 Up-regulated in PsA     |
| LRRC30        | 0.0332722 | 0.807957 Down-regulated in PsA |
| CTD-2313J17.1 | 0.0332758 | 0.734658 Down-regulated in PsA |
| RP11-68I18.2  | 0.0333267 | 1.14277 Up-regulated in PsA    |
| RN7SL300P     | 0.0333303 | 1.35903 Up-regulated in PsA    |
| STX18-IT1     | 0.0333335 | 1.49625 Up-regulated in PsA    |
| SNORD88A      | 0.0333336 | 1.18234 Up-regulated in PsA    |
| RP11-613M5.2  | 0.0333364 | 1.11122 Up-regulated in PsA    |

|               |           |                                |
|---------------|-----------|--------------------------------|
| RP11-122C5.2  | 0.0333449 | 1.18138 Up-regulated in PsA    |
| MIR654        | 0.0333529 | 1.27751 Up-regulated in PsA    |
| TPD52L3       | 0.0333795 | 0.764217 Down-regulated in PsA |
| ZNF627        | 0.0333859 | 1.16945 Up-regulated in PsA    |
| LOC102724264  | 0.0333879 | 1.27161 Up-regulated in PsA    |
| PIK3IP1-AS1   | 0.033389  | 0.770218 Down-regulated in PsA |
| RP11-170N16.1 | 0.0334123 | 0.900287 Down-regulated in PsA |
| RP11-305L7.3  | 0.033447  | 1.30757 Up-regulated in PsA    |
| DISC2         | 0.0334528 | 0.534228 Down-regulated in PsA |
| CTA-276O3.4   | 0.0334563 | 1.18185 Up-regulated in PsA    |
| CDCA4         | 0.0334605 | 1.15513 Up-regulated in PsA    |
| APOBEC1       | 0.0334798 | 1.42404 Up-regulated in PsA    |
| PCMTD1        | 0.0334905 | 0.655904 Down-regulated in PsA |
| DCAF7         | 0.0335113 | 0.80636 Down-regulated in PsA  |
| SCAMP5        | 0.0335117 | 1.37524 Up-regulated in PsA    |
| Y_RNA         | 0.0335273 | 0.77067 Down-regulated in PsA  |
| HSPE1P16      | 0.0335279 | 0.825767 Down-regulated in PsA |
| RP11-453N18.1 | 0.0335355 | 0.6924 Down-regulated in PsA   |
| IL34          | 0.0335424 | 1.10746 Up-regulated in PsA    |
| RCC2          | 0.0335572 | 0.887127 Down-regulated in PsA |
| FLG-AS1       | 0.0335834 | 0.809182 Down-regulated in PsA |
| RP11-241F15.5 | 0.0335952 | 1.134 Up-regulated in PsA      |
| INSIG2        | 0.0336002 | 0.523545 Down-regulated in PsA |
| RP11-415C15.1 | 0.0336146 | 0.858145 Down-regulated in PsA |
| RPL23AP63     | 0.0336218 | 1.30062 Up-regulated in PsA    |

|                |           |                                |
|----------------|-----------|--------------------------------|
| UGGT1          | 0.0336562 | 0.82359 Down-regulated in PsA  |
| RP11-475A13.2  | 0.0337003 | 0.830198 Down-regulated in PsA |
| MGC16142       | 0.0337094 | 0.759407 Down-regulated in PsA |
| KRT17P5        | 0.0337113 | 1.17124 Up-regulated in PsA    |
| RP11-1079K10.1 | 0.0337178 | 1.4187 Up-regulated in PsA     |
| AFF2-IT1       | 0.0337209 | 1.12363 Up-regulated in PsA    |
| RP11-383F6.1   | 0.0337212 | 0.885545 Down-regulated in PsA |
| RP11-338C15.2  | 0.0337443 | 1.40901 Up-regulated in PsA    |
| AGAP13P        | 0.0337687 | 1.23558 Up-regulated in PsA    |
| RN7SL362P      | 0.0338225 | 1.35585 Up-regulated in PsA    |
| RP5-1077B9.5   | 0.0338332 | 1.16664 Up-regulated in PsA    |
| ERMARD         | 0.0338392 | 0.61129 Down-regulated in PsA  |
| PRSS29P        | 0.033841  | 1.3125 Up-regulated in PsA     |
| ZNF33B         | 0.033849  | 0.717258 Down-regulated in PsA |
| RP11-626G11.1  | 0.0338494 | 0.907283 Down-regulated in PsA |
| LOC101928475   | 0.0338506 | 0.809671 Down-regulated in PsA |
| RP11-334E15.1  | 0.0338977 | 0.783096 Down-regulated in PsA |
| MTND2P22       | 0.0339258 | 1.30614 Up-regulated in PsA    |
| CTD-2331H12.5  | 0.0339263 | 0.538511 Down-regulated in PsA |
| RN7SL484P      | 0.0339425 | 1.24401 Up-regulated in PsA    |
| RBM44          | 0.0339469 | 1.28707 Up-regulated in PsA    |
| EFCAB7         | 0.0339561 | 0.53028 Down-regulated in PsA  |
| UBALD2         | 0.0339871 | 1.16944 Up-regulated in PsA    |
| LOC101928371   | 0.0339969 | 0.851336 Down-regulated in PsA |
| DACH2          | 0.0340202 | 0.720064 Down-regulated in PsA |

|               |           |                                |
|---------------|-----------|--------------------------------|
| MROH2A        | 0.0341395 | 0.78921 Down-regulated in PsA  |
| NDUFA5P4      | 0.0341614 | 1.14547 Up-regulated in PsA    |
| MIR4462       | 0.0341921 | 0.693542 Down-regulated in PsA |
| TRIM46        | 0.034225  | 1.09183 Up-regulated in PsA    |
| PRUNE         | 0.0342333 | 0.906033 Down-regulated in PsA |
| INPP5D        | 0.0342491 | 0.841161 Down-regulated in PsA |
| NCK1          | 0.0342585 | 0.682148 Down-regulated in PsA |
| NKRF          | 0.0343012 | 0.798459 Down-regulated in PsA |
| RP1-3J17.3    | 0.0343047 | 1.1102 Up-regulated in PsA     |
| MTERF1        | 0.0343409 | 0.692154 Down-regulated in PsA |
| TMEM14EP      | 0.0343446 | 0.583037 Down-regulated in PsA |
| MROH1         | 0.0343666 | 1.08321 Up-regulated in PsA    |
| MIR5088       | 0.0343746 | 1.0827 Up-regulated in PsA     |
| RP11-337N6.1  | 0.0343777 | 1.13726 Up-regulated in PsA    |
| RPS6KC1       | 0.0344008 | 0.73826 Down-regulated in PsA  |
| RP11-757G14.3 | 0.0344023 | 1.11224 Up-regulated in PsA    |
| RP11-757G14.3 | 0.0344023 | 1.11224 Up-regulated in PsA    |
| RP11-613M5.1  | 0.0344177 | 0.778212 Down-regulated in PsA |
| MAGEB2        | 0.0344218 | 1.03298 Up-regulated in PsA    |
| RP11-112N19.1 | 0.0344555 | 1.33336 Up-regulated in PsA    |
| RN7SL464P     | 0.0344682 | 1.28113 Up-regulated in PsA    |
| KCNG1         | 0.034473  | 0.784315 Down-regulated in PsA |
| ERN1          | 0.0344748 | 1.19033 Up-regulated in PsA    |
| RN7SL397P     | 0.0345171 | 1.3971 Up-regulated in PsA     |
| BIRC6-AS2     | 0.0345323 | 0.864056 Down-regulated in PsA |



|               |           |                                |
|---------------|-----------|--------------------------------|
| RP4-781K5.2   | 0.0345652 | 1.13092 Up-regulated in PsA    |
| HOMER3        | 0.0345758 | 0.879374 Down-regulated in PsA |
| LLNLR-276E7.1 | 0.0345785 | 1.10127 Up-regulated in PsA    |
| CTD-2249K22.1 | 0.0345815 | 1.61297 Up-regulated in PsA    |
| LILRA6        | 0.0345865 | 0.806884 Down-regulated in PsA |
| HDX           | 0.034615  | 0.68155 Down-regulated in PsA  |
| RP3-514P16.1  | 0.0346189 | 0.839939 Down-regulated in PsA |
| AC073063.10   | 0.0346467 | 0.65254 Down-regulated in PsA  |
| RP11-517B11.6 | 0.0346868 | 1.28504 Up-regulated in PsA    |
| TMEM54        | 0.0347083 | 1.12392 Up-regulated in PsA    |
| RP11-122K13.7 | 0.034718  | 0.828156 Down-regulated in PsA |
| SRD5A3        | 0.0347243 | 0.765566 Down-regulated in PsA |
| RP11-798G7.8  | 0.0347253 | 0.660445 Down-regulated in PsA |
| LOC101928323  | 0.0347342 | 1.16114 Up-regulated in PsA    |
| STARD7-AS1    | 0.034754  | 1.12772 Up-regulated in PsA    |
| RP11-690C23.5 | 0.0347988 | 1.05736 Up-regulated in PsA    |
| KRTAP10-7     | 0.0348261 | 1.30604 Up-regulated in PsA    |
| ALDH3A2       | 0.0348378 | 0.823091 Down-regulated in PsA |
| RARS2         | 0.0349166 | 0.933271 Down-regulated in PsA |
| AP001059.5    | 0.0349173 | 1.19415 Up-regulated in PsA    |
| FAM183CP      | 0.0349427 | 1.36673 Up-regulated in PsA    |
| AC137934.1    | 0.0349478 | 0.776323 Down-regulated in PsA |
| CTD-2012I17.1 | 0.0349662 | 0.584195 Down-regulated in PsA |
| BHLHA9        | 0.0350084 | 0.879862 Down-regulated in PsA |
| FAM129A       | 0.0350103 | 0.772888 Down-regulated in PsA |

|               |           |                                |
|---------------|-----------|--------------------------------|
| HYPM          | 0.035016  | 0.928493 Down-regulated in PsA |
| CTD-2410N18.3 | 0.035025  | 1.03648 Up-regulated in PsA    |
| CCL21         | 0.035054  | 1.40557 Up-regulated in PsA    |
| CBX1          | 0.0351074 | 0.802936 Down-regulated in PsA |
| IFNW1         | 0.035133  | 1.2622 Up-regulated in PsA     |
| CCDC153       | 0.035146  | 0.894497 Down-regulated in PsA |
| GMPPB         | 0.0351462 | 0.762754 Down-regulated in PsA |
| API5P1        | 0.0351464 | 0.668939 Down-regulated in PsA |
| AC011242.5    | 0.0352121 | 1.27992 Up-regulated in PsA    |
| RP11-26L20.4  | 0.0352197 | 1.12595 Up-regulated in PsA    |
| RP11-445P17.6 | 0.0352392 | 1.45903 Up-regulated in PsA    |
| AC004129.9    | 0.0352621 | 1.10813 Up-regulated in PsA    |
| CDC5L         | 0.0352833 | 0.698373 Down-regulated in PsA |
| MIR1228       | 0.0352879 | 1.19474 Up-regulated in PsA    |
| LINC00506     | 0.0352915 | 1.17373 Up-regulated in PsA    |
| RP11-432I5.4  | 0.0352926 | 0.737328 Down-regulated in PsA |
| RPL23AP44     | 0.0353015 | 1.16808 Up-regulated in PsA    |
| SLFN12        | 0.035324  | 0.572376 Down-regulated in PsA |
| MTATP6P15     | 0.0353435 | 0.772443 Down-regulated in PsA |
| Metazoa_SRP   | 0.0353761 | 0.864471 Down-regulated in PsA |
| ASB5          | 0.0354539 | 1.15825 Up-regulated in PsA    |
| C11orf54      | 0.0354574 | 0.747229 Down-regulated in PsA |
| AP000560.3    | 0.0354631 | 1.47547 Up-regulated in PsA    |
| RP11-190D6.2  | 0.0354798 | 1.31212 Up-regulated in PsA    |
| MIR4480       | 0.0355016 | 1.31034 Up-regulated in PsA    |

|               |           |                                |
|---------------|-----------|--------------------------------|
| EFCAB13       | 0.0355017 | 2.04819 Up-regulated in PsA    |
| RP13-347D8.1  | 0.0355291 | 0.85108 Down-regulated in PsA  |
| MIR4746       | 0.0355302 | 1.20361 Up-regulated in PsA    |
| CCIN          | 0.0355367 | 0.83452 Down-regulated in PsA  |
| RP11-312A15.2 | 0.0356204 | 1.26887 Up-regulated in PsA    |
| AC008060.5    | 0.035642  | 1.19449 Up-regulated in PsA    |
| DCAF8L1       | 0.0356432 | 0.824748 Down-regulated in PsA |
| RP11-259O2.1  | 0.0356558 | 1.07908 Up-regulated in PsA    |
| XRCC6P5       | 0.0357117 | 0.846163 Down-regulated in PsA |
| RP11-432M8.2  | 0.0357132 | 1.17162 Up-regulated in PsA    |
| RP11-697E22.1 | 0.0357158 | 0.781726 Down-regulated in PsA |
| SERPINA6      | 0.035731  | 0.794916 Down-regulated in PsA |
| CYP2C61P      | 0.035738  | 0.673946 Down-regulated in PsA |
| AC093326.3    | 0.0357694 | 0.785678 Down-regulated in PsA |
| RP11-326E7.1  | 0.0357703 | 0.924814 Down-regulated in PsA |
| RP11-333A23.2 | 0.0357864 | 0.704892 Down-regulated in PsA |
| ELK3          | 0.0358054 | 0.779113 Down-regulated in PsA |
| DEFB104A      | 0.035807  | 1.11874 Up-regulated in PsA    |
| RP11-684N3.1  | 0.0358149 | 1.27502 Up-regulated in PsA    |
| RP11-89K18.1  | 0.0358209 | 1.12609 Up-regulated in PsA    |
| QRFPR         | 0.0358283 | 0.855099 Down-regulated in PsA |
| APIP          | 0.0358544 | 0.683758 Down-regulated in PsA |
| RP5-1193P9.2  | 0.0358715 | 0.680693 Down-regulated in PsA |
| RP11-90P5.2   | 0.0358725 | 0.894098 Down-regulated in PsA |
| SNORA40       | 0.0358774 | 0.8348 Down-regulated in PsA   |

|               |           |                                |
|---------------|-----------|--------------------------------|
| RP11-751K21.1 | 0.0358835 | 1.09722 Up-regulated in PsA    |
| INPP4B        | 0.0358901 | 0.711149 Down-regulated in PsA |
| LINC00692     | 0.0359252 | 0.901072 Down-regulated in PsA |
| MIR329-1      | 0.0359269 | 1.51459 Up-regulated in PsA    |
| FSHR          | 0.0359327 | 1.16423 Up-regulated in PsA    |
| RP11-19P22.7  | 0.0359612 | 0.775298 Down-regulated in PsA |
| SNAR-A3       | 0.0359829 | 1.16163 Up-regulated in PsA    |
| SNAR-A3       | 0.0359829 | 1.16163 Up-regulated in PsA    |
| SNAR-A3       | 0.0359829 | 1.16163 Up-regulated in PsA    |
| SNAR-A3       | 0.0359829 | 1.16163 Up-regulated in PsA    |
| SNAR-A4       | 0.0359829 | 1.16163 Up-regulated in PsA    |
| SNAR-A5       | 0.0359829 | 1.16163 Up-regulated in PsA    |
| SNAR-A7       | 0.0359829 | 1.16163 Up-regulated in PsA    |
| SNAR-A6       | 0.0359829 | 1.16163 Up-regulated in PsA    |
| SNAR-A8       | 0.0359829 | 1.16163 Up-regulated in PsA    |
| RNU6-45P      | 0.0360393 | 1.14133 Up-regulated in PsA    |
| ZNF564        | 0.0360515 | 0.845244 Down-regulated in PsA |
| SNORA40       | 0.0360754 | 0.866823 Down-regulated in PsA |
| PRPH2         | 0.0360846 | 0.861925 Down-regulated in PsA |
| RTKN          | 0.0361046 | 1.13533 Up-regulated in PsA    |
| RWDD3         | 0.0361065 | 0.800592 Down-regulated in PsA |
| RP3-399J4.3   | 0.0361255 | 1.3224 Up-regulated in PsA     |
| PPBP          | 0.03613   | 4.53139 Up-regulated in PsA    |
| RP5-945F2.2   | 0.0361352 | 1.09102 Up-regulated in PsA    |
| RP5-1037N22.2 | 0.0361528 | 1.11018 Up-regulated in PsA    |

|              |           |                                |
|--------------|-----------|--------------------------------|
| LOC101929261 | 0.0362125 | 1.19633 Up-regulated in PsA    |
| SCN4B        | 0.0362327 | 0.853344 Down-regulated in PsA |
| RP3-441A12.1 | 0.0362435 | 0.681339 Down-regulated in PsA |
| LILRA4       | 0.036245  | 1.45462 Up-regulated in PsA    |
| WDR12        | 0.0362458 | 0.541091 Down-regulated in PsA |
| SORBS3       | 0.0362501 | 0.781425 Down-regulated in PsA |
| AKIP1        | 0.0362625 | 0.816163 Down-regulated in PsA |
| CD276        | 0.0363278 | 0.90596 Down-regulated in PsA  |
| OR2T11       | 0.0363345 | 1.18046 Up-regulated in PsA    |
| ZNF787       | 0.0363358 | 1.1581 Up-regulated in PsA     |
| SKA2         | 0.0363486 | 0.934373 Down-regulated in PsA |
| RNF38        | 0.0363494 | 1.21798 Up-regulated in PsA    |
| RP11-69M1.3  | 0.0363601 | 0.838132 Down-regulated in PsA |
| DENND1B      | 0.0363659 | 0.772221 Down-regulated in PsA |
| LDB2         | 0.0363763 | 1.46343 Up-regulated in PsA    |
| ARHGAP15     | 0.0363973 | 0.418178 Down-regulated in PsA |
| ZBTB40       | 0.0364218 | 0.816841 Down-regulated in PsA |
| LILRP2       | 0.0364284 | 0.713719 Down-regulated in PsA |
| TPRG1        | 0.0364432 | 0.454708 Down-regulated in PsA |
| AC010872.1   | 0.0364809 | 1.22806 Up-regulated in PsA    |
| ZNF780A      | 0.0365172 | 0.707327 Down-regulated in PsA |
| STAU2-AS1    | 0.0365172 | 0.59981 Down-regulated in PsA  |
| MIR5705      | 0.0365313 | 1.18242 Up-regulated in PsA    |
| RP4-541C22.5 | 0.0365421 | 0.949013 Down-regulated in PsA |
| PDCL         | 0.0365431 | 0.870319 Down-regulated in PsA |

|               |           |                                |
|---------------|-----------|--------------------------------|
| AC090505.5    | 0.0365504 | 1.25503 Up-regulated in PsA    |
| KCNC4-AS1     | 0.0365806 | 1.48288 Up-regulated in PsA    |
| RP11-123O10.1 | 0.0365909 | 1.16506 Up-regulated in PsA    |
| RN7SKP249     | 0.0365981 | 1.08019 Up-regulated in PsA    |
| TACO1         | 0.036601  | 0.714487 Down-regulated in PsA |
| OR9G1         | 0.0366068 | 1.55151 Up-regulated in PsA    |
| SMARCE1P4     | 0.0366226 | 1.23848 Up-regulated in PsA    |
| RP11-64I5.1   | 0.036631  | 1.21654 Up-regulated in PsA    |
| SLC50A1       | 0.0366361 | 1.1491 Up-regulated in PsA     |
| LOC101928225  | 0.0366466 | 1.38422 Up-regulated in PsA    |
| LINC00278     | 0.0366713 | 0.802727 Down-regulated in PsA |
| pRNA          | 0.036673  | 1.12081 Up-regulated in PsA    |
| CYCSP5        | 0.0367043 | 0.664112 Down-regulated in PsA |
| RB1           | 0.0367168 | 0.801083 Down-regulated in PsA |
| SMARCAL1      | 0.0367217 | 0.619922 Down-regulated in PsA |
| LA16c-2F2.5   | 0.0367332 | 1.06198 Up-regulated in PsA    |
| RP11-276H7.2  | 0.0367645 | 1.2161 Up-regulated in PsA     |
| RP11-91A18.4  | 0.0367888 | 1.23442 Up-regulated in PsA    |
| LOC102724539  | 0.0367966 | 1.33967 Up-regulated in PsA    |
| AC068134.8    | 0.036799  | 0.731184 Down-regulated in PsA |
| RN7SKP235     | 0.0368574 | 1.29633 Up-regulated in PsA    |
| RP11-423E7.1  | 0.0368585 | 1.41171 Up-regulated in PsA    |
| CNTNAP3P2     | 0.0368736 | 0.84189 Down-regulated in PsA  |
| SLC26A11      | 0.0368798 | 0.824562 Down-regulated in PsA |
| SMIM6         | 0.0368903 | 1.13271 Up-regulated in PsA    |

|                   |           |                                |
|-------------------|-----------|--------------------------------|
| PDHX              | 0.0369721 | 0.646206 Down-regulated in PsA |
| SHH               | 0.036975  | 1.17271 Up-regulated in PsA    |
| RPL23P11          | 0.0369897 | 1.5491 Up-regulated in PsA     |
| DIS3L             | 0.0369908 | 0.819203 Down-regulated in PsA |
| CLCN5             | 0.0369925 | 0.733226 Down-regulated in PsA |
| UCA1              | 0.0370029 | 0.907474 Down-regulated in PsA |
| RP11-162N7.1      | 0.0370802 | 1.41341 Up-regulated in PsA    |
| LINC01070         | 0.0371163 | 0.771344 Down-regulated in PsA |
| RP11-522B15.6     | 0.0371203 | 1.2361 Up-regulated in PsA     |
| KRT17P4           | 0.037124  | 1.18579 Up-regulated in PsA    |
| MTCO2P23          | 0.0371293 | 1.89595 Up-regulated in PsA    |
| RP11-666A20.3     | 0.0371446 | 1.10195 Up-regulated in PsA    |
| BNIP3P38          | 0.0371585 | 0.777573 Down-regulated in PsA |
| HNRNPA1P15        | 0.0371654 | 0.799977 Down-regulated in PsA |
| AAGAB             | 0.0371662 | 0.876318 Down-regulated in PsA |
| XXbac-BPG181B23.6 | 0.0371732 | 1.32064 Up-regulated in PsA    |
| RP11-716D19.1     | 0.0372192 | 0.739561 Down-regulated in PsA |
| WBSCR28           | 0.0372245 | 0.810532 Down-regulated in PsA |
| CTB-129O4.1       | 0.0372398 | 1.27079 Up-regulated in PsA    |
| ST20-MTHFS        | 0.0373558 | 0.722315 Down-regulated in PsA |
| C10orf90          | 0.0373607 | 0.605212 Down-regulated in PsA |
| RP11-82O19.1      | 0.0373798 | 1.13991 Up-regulated in PsA    |
| RP11-553L6.2      | 0.037389  | 1.49869 Up-regulated in PsA    |
| AKNAD1            | 0.0373955 | 0.893662 Down-regulated in PsA |
| LINGO1            | 0.037444  | 1.07977 Up-regulated in PsA    |

|                  |           |                                |
|------------------|-----------|--------------------------------|
| RP11-362K14.7    | 0.0374512 | 1.2267 Up-regulated in PsA     |
| PRKD3            | 0.0374551 | 0.765009 Down-regulated in PsA |
| UBTF             | 0.0374853 | 0.860412 Down-regulated in PsA |
| AC016735.1       | 0.0375036 | 0.976342 Down-regulated in PsA |
| RP11-142O6.1     | 0.0375534 | 1.72022 Up-regulated in PsA    |
| SMKR1            | 0.0375677 | 0.851924 Down-regulated in PsA |
| BIK              | 0.0375872 | 1.3217 Up-regulated in PsA     |
| MED28P7          | 0.0375971 | 0.868292 Down-regulated in PsA |
| SLC25A24         | 0.037602  | 0.675654 Down-regulated in PsA |
| RPS7P7           | 0.0376036 | 0.827875 Down-regulated in PsA |
| ATG101           | 0.0376058 | 0.804784 Down-regulated in PsA |
| Y_RNA            | 0.0376192 | 1.17003 Up-regulated in PsA    |
| TMEM55A          | 0.0376266 | 0.755625 Down-regulated in PsA |
| RAB8A            | 0.0376384 | 0.914253 Down-regulated in PsA |
| XXbac-B444P24.14 | 0.0376572 | 1.18736 Up-regulated in PsA    |
| MIR4283-2        | 0.0376621 | 0.888333 Down-regulated in PsA |
| ARL6IP1          | 0.0376626 | 0.855527 Down-regulated in PsA |
| FPGT             | 0.0376787 | 0.50427 Down-regulated in PsA  |
| CPLX3            | 0.0376915 | 1.10589 Up-regulated in PsA    |
| RP11-636N17.1    | 0.0376981 | 0.870514 Down-regulated in PsA |
| BLM              | 0.0377007 | 0.740259 Down-regulated in PsA |
| VKORC1L1         | 0.0377122 | 0.740304 Down-regulated in PsA |
| HAS1             | 0.0377399 | 1.39336 Up-regulated in PsA    |
| ZNF484           | 0.0377674 | 0.837318 Down-regulated in PsA |
| JAGN1            | 0.0377789 | 0.837914 Down-regulated in PsA |



|               |           |                                |
|---------------|-----------|--------------------------------|
| TMEM178A      | 0.0377913 | 0.780666 Down-regulated in PsA |
| LRPPRC        | 0.0378322 | 0.803524 Down-regulated in PsA |
| NPTN-IT1      | 0.037833  | 0.711858 Down-regulated in PsA |
| TERT          | 0.0378559 | 1.16165 Up-regulated in PsA    |
| RN7SL83P      | 0.0378798 | 1.05986 Up-regulated in PsA    |
| RP11-609N14.4 | 0.0378861 | 1.17735 Up-regulated in PsA    |
| MINA          | 0.0379202 | 0.761075 Down-regulated in PsA |
| RP11-452L6.5  | 0.0379674 | 1.15174 Up-regulated in PsA    |
| HGFAC         | 0.0379722 | 0.827451 Down-regulated in PsA |
| CYP4A22       | 0.03798   | 1.33657 Up-regulated in PsA    |
| FBXO45        | 0.037981  | 0.566868 Down-regulated in PsA |
| RP11-4M23.3   | 0.0379907 | 0.90936 Down-regulated in PsA  |
| PLEKHA8       | 0.0379948 | 0.864241 Down-regulated in PsA |
| API5P2        | 0.0379966 | 0.793871 Down-regulated in PsA |
| FHL5          | 0.0380089 | 1.04806 Up-regulated in PsA    |
| FAM86C2P      | 0.0380195 | 1.25346 Up-regulated in PsA    |
| TRAPPC2L      | 0.0380442 | 0.737323 Down-regulated in PsA |
| LOC100505658  | 0.0380922 | 1.31567 Up-regulated in PsA    |
| LYAR          | 0.0381005 | 0.609435 Down-regulated in PsA |
| GS1-279B7.2   | 0.038108  | 0.758162 Down-regulated in PsA |
| FGFRL1        | 0.0381087 | 0.817604 Down-regulated in PsA |
| RP11-255G12.2 | 0.0381093 | 1.23604 Up-regulated in PsA    |
| SPHK2         | 0.0381161 | 0.913409 Down-regulated in PsA |
| WFDC3         | 0.038137  | 1.08871 Up-regulated in PsA    |
| TMEM107       | 0.0381576 | 0.819865 Down-regulated in PsA |

|               |           |                                |
|---------------|-----------|--------------------------------|
| RBM27         | 0.0381905 | 0.828562 Down-regulated in PsA |
| CDK2AP1       | 0.0381961 | 0.829119 Down-regulated in PsA |
| Y_RNA         | 0.0381997 | 0.710288 Down-regulated in PsA |
| MIR203A       | 0.0382084 | 0.775436 Down-regulated in PsA |
| LINC00622     | 0.0382167 | 0.757911 Down-regulated in PsA |
| NTS           | 0.0382257 | 0.7376 Down-regulated in PsA   |
| RP5-856G1.1   | 0.0382467 | 1.31463 Up-regulated in PsA    |
| RP11-536P16.2 | 0.0382618 | 1.36559 Up-regulated in PsA    |
| RP11-666E17.1 | 0.0383155 | 1.56153 Up-regulated in PsA    |
| NUBP1         | 0.0383357 | 0.761193 Down-regulated in PsA |
| RN7SL340P     | 0.0384147 | 1.09326 Up-regulated in PsA    |
| FUK           | 0.038432  | 0.785462 Down-regulated in PsA |
| POLQ          | 0.0384368 | 0.511374 Down-regulated in PsA |
| GALNTL5       | 0.0384534 | 0.635781 Down-regulated in PsA |
| IGBP1P4       | 0.0384973 | 1.18796 Up-regulated in PsA    |
| ZNF205        | 0.0385187 | 0.792162 Down-regulated in PsA |
| ECI2          | 0.0385245 | 0.749065 Down-regulated in PsA |
| TMEM151B      | 0.0385257 | 1.20236 Up-regulated in PsA    |
| ACOX2         | 0.0385664 | 1.36287 Up-regulated in PsA    |
| AC113618.2    | 0.0385673 | 1.40879 Up-regulated in PsA    |
| KLHL30        | 0.0385725 | 0.756761 Down-regulated in PsA |
| GRB14         | 0.0385785 | 0.824645 Down-regulated in PsA |
| NXPE4         | 0.0386206 | 0.740751 Down-regulated in PsA |
| TIMMDC1       | 0.0386259 | 0.778631 Down-regulated in PsA |
| POLR2J3       | 0.0387103 | 1.16214 Up-regulated in PsA    |

|               |           |                                |
|---------------|-----------|--------------------------------|
| Y_RNA         | 0.0387294 | 0.924905 Down-regulated in PsA |
| TMEM106A      | 0.0387415 | 0.602046 Down-regulated in PsA |
| OR13F1        | 0.0387603 | 0.69956 Down-regulated in PsA  |
| BAG2          | 0.0387787 | 0.484624 Down-regulated in PsA |
| RP11-861L17.2 | 0.0387973 | 1.34262 Up-regulated in PsA    |
| CTB-57H20.1   | 0.0388053 | 0.60382 Down-regulated in PsA  |
| NBN           | 0.0388164 | 0.744317 Down-regulated in PsA |
| SH2D5         | 0.0388176 | 1.19231 Up-regulated in PsA    |
| RP11-432M8.11 | 0.0388513 | 1.42744 Up-regulated in PsA    |
| RP1-251M9.2   | 0.0389058 | 1.36541 Up-regulated in PsA    |
| PRR29         | 0.0389211 | 0.829447 Down-regulated in PsA |
| AMMECR1       | 0.0389225 | 0.921242 Down-regulated in PsA |
| RP11-476J6.1  | 0.0389288 | 0.667343 Down-regulated in PsA |
| ERCC4         | 0.0389565 | 0.5603 Down-regulated in PsA   |
| RP11-413M3.4  | 0.0389724 | 1.32971 Up-regulated in PsA    |
| C18orf12      | 0.038983  | 1.23297 Up-regulated in PsA    |
| PSMC1P13      | 0.0389994 | 1.18488 Up-regulated in PsA    |
| MTND3P17      | 0.0390074 | 0.85957 Down-regulated in PsA  |
| RP11-102F4.2  | 0.0390271 | 1.19135 Up-regulated in PsA    |
| NT5DC1        | 0.0391153 | 0.868158 Down-regulated in PsA |
| GABRE         | 0.0391172 | 1.39163 Up-regulated in PsA    |
| PLXDC2        | 0.0391324 | 0.920773 Down-regulated in PsA |
| LOC101927292  | 0.0391464 | 0.858861 Down-regulated in PsA |
| MIR328        | 0.0391631 | 1.15179 Up-regulated in PsA    |
| MYL12B        | 0.0391858 | 0.881678 Down-regulated in PsA |

|               |           |                                |
|---------------|-----------|--------------------------------|
| COX6B1P2      | 0.0392213 | 1.18362 Up-regulated in PsA    |
| GJA6P         | 0.0392464 | 0.562336 Down-regulated in PsA |
| TLR10         | 0.0392684 | 0.491266 Down-regulated in PsA |
| RP11-420K8.1  | 0.0393005 | 0.65256 Down-regulated in PsA  |
| LINC00652     | 0.0393051 | 0.678946 Down-regulated in PsA |
| RP11-74H8.1   | 0.0393284 | 1.19622 Up-regulated in PsA    |
| RP11-96K19.2  | 0.0393367 | 0.765307 Down-regulated in PsA |
| RHOT2         | 0.0393646 | 1.12327 Up-regulated in PsA    |
| RP11-455O6.2  | 0.0393841 | 1.42145 Up-regulated in PsA    |
| TSPY1         | 0.0393857 | 0.78078 Down-regulated in PsA  |
| NUS1P1        | 0.0393965 | 0.84684 Down-regulated in PsA  |
| GOT2P5        | 0.0394335 | 1.28943 Up-regulated in PsA    |
| NR2F6         | 0.0394797 | 1.29485 Up-regulated in PsA    |
| C4orf32       | 0.0395189 | 0.868704 Down-regulated in PsA |
| TES           | 0.0395451 | 0.782409 Down-regulated in PsA |
| RN7SL452P     | 0.0396032 | 1.47027 Up-regulated in PsA    |
| MYOF          | 0.0396447 | 0.583242 Down-regulated in PsA |
| DCAF13P3      | 0.0396581 | 0.687675 Down-regulated in PsA |
| RP11-239E10.3 | 0.0396867 | 0.889898 Down-regulated in PsA |
| HOXD-AS2      | 0.039713  | 1.30174 Up-regulated in PsA    |
| RP11-666A1.4  | 0.0397405 | 1.36738 Up-regulated in PsA    |
| DLGAP3        | 0.0397513 | 0.704752 Down-regulated in PsA |
| RP11-342K6.2  | 0.0397597 | 0.653239 Down-regulated in PsA |
| RP11-219I21.1 | 0.0397896 | 1.24181 Up-regulated in PsA    |
| RAB27A        | 0.0397933 | 0.766708 Down-regulated in PsA |

|                |           |                                |
|----------------|-----------|--------------------------------|
| ARHGAP19-SLIT1 | 0.0397987 | 0.781832 Down-regulated in PsA |
| HELLS          | 0.0398404 | 1.25305 Up-regulated in PsA    |
| FOXI1          | 0.0398489 | 0.907273 Down-regulated in PsA |
| RP11-428G2.1   | 0.0398997 | 0.729951 Down-regulated in PsA |
| ZNF546         | 0.0398998 | 0.931738 Down-regulated in PsA |
| AC007879.6     | 0.0399109 | 1.42783 Up-regulated in PsA    |
| EIF3EP2        | 0.0399132 | 1.62409 Up-regulated in PsA    |
| RP11-243J16.8  | 0.0399224 | 1.18259 Up-regulated in PsA    |
| ENAH           | 0.0399505 | 1.41075 Up-regulated in PsA    |
| RP11-15G8.1    | 0.039982  | 1.53449 Up-regulated in PsA    |
| RP1-90J20.2    | 0.0400238 | 1.39544 Up-regulated in PsA    |
| CES5AP1        | 0.0400753 | 1.28599 Up-regulated in PsA    |
| TIGIT          | 0.0400803 | 1.38548 Up-regulated in PsA    |
| LVRN           | 0.0401106 | 0.774401 Down-regulated in PsA |
| FAM127B        | 0.0401208 | 0.870488 Down-regulated in PsA |
| TTC33          | 0.0401801 | 0.467688 Down-regulated in PsA |
| PYGM           | 0.0401853 | 1.18099 Up-regulated in PsA    |
| C10orf111      | 0.0401871 | 1.43967 Up-regulated in PsA    |
| MZB1           | 0.0401913 | 1.68284 Up-regulated in PsA    |
| HSPA8          | 0.0402059 | 0.845128 Down-regulated in PsA |
| RP11-536C10.10 | 0.0403203 | 1.15674 Up-regulated in PsA    |
| C17orf77       | 0.0403485 | 1.2512 Up-regulated in PsA     |
| RP11-113K21.1  | 0.0403505 | 1.23149 Up-regulated in PsA    |
| B3GNT7         | 0.0403911 | 0.780481 Down-regulated in PsA |
| SNORD38        | 0.0403915 | 0.750388 Down-regulated in PsA |

|               |           |                                |
|---------------|-----------|--------------------------------|
| STAM          | 0.0404085 | 0.820643 Down-regulated in PsA |
| MIR103B2      | 0.0404117 | 0.810463 Down-regulated in PsA |
| DLX3          | 0.0405341 | 0.90549 Down-regulated in PsA  |
| KCTD15        | 0.0405721 | 1.0218 Up-regulated in PsA     |
| EIF4E2        | 0.0406009 | 0.892851 Down-regulated in PsA |
| MIR4316       | 0.0406383 | 1.17502 Up-regulated in PsA    |
| CTC-436K13.6  | 0.0406539 | 1.63336 Up-regulated in PsA    |
| MIR4774       | 0.0406543 | 0.692692 Down-regulated in PsA |
| RP11-359P18.5 | 0.0406586 | 1.48595 Up-regulated in PsA    |
| NVL           | 0.0406709 | 0.751349 Down-regulated in PsA |
| IFNL4P1       | 0.040715  | 1.14674 Up-regulated in PsA    |
| IFITM1        | 0.0407218 | 1.3716 Up-regulated in PsA     |
| RP11-325O24.5 | 0.0407632 | 1.44766 Up-regulated in PsA    |
| TONSL         | 0.040833  | 0.823483 Down-regulated in PsA |
| HSPA1L        | 0.0408776 | 0.869676 Down-regulated in PsA |
| ZNF786        | 0.0408944 | 0.760729 Down-regulated in PsA |
| PLSCR4        | 0.0409321 | 0.695669 Down-regulated in PsA |
| MTCO3P17      | 0.0409717 | 0.867943 Down-regulated in PsA |
| LOC100128554  | 0.0409739 | 1.44067 Up-regulated in PsA    |
| TMEM185A      | 0.0409752 | 0.845585 Down-regulated in PsA |
| ATP8B1        | 0.0410065 | 0.489571 Down-regulated in PsA |
| CELF1         | 0.041026  | 0.895449 Down-regulated in PsA |
| CTD-2013N17.6 | 0.0410345 | 0.791349 Down-regulated in PsA |
| NPY           | 0.0410559 | 1.06896 Up-regulated in PsA    |
| DTX2          | 0.0410804 | 1.08811 Up-regulated in PsA    |

|                |           |                                |
|----------------|-----------|--------------------------------|
| RP11-240G22.1  | 0.0410955 | 0.811706 Down-regulated in PsA |
| RP11-225B17.1  | 0.0411084 | 0.760168 Down-regulated in PsA |
| ST20-AS1       | 0.041132  | 0.792106 Down-regulated in PsA |
| CDON           | 0.0411333 | 0.641965 Down-regulated in PsA |
| C18orf42       | 0.0411589 | 0.715935 Down-regulated in PsA |
| TSPY14P        | 0.0411703 | 1.23923 Up-regulated in PsA    |
| MIR3692        | 0.0411762 | 1.61451 Up-regulated in PsA    |
| MIR523         | 0.0411888 | 1.40728 Up-regulated in PsA    |
| ZSCAN2         | 0.0412108 | 0.796817 Down-regulated in PsA |
| RN7SL845P      | 0.0412399 | 1.17775 Up-regulated in PsA    |
| YAE1D1         | 0.0412609 | 0.415976 Down-regulated in PsA |
| RP11-666O2.5   | 0.0412665 | 1.10931 Up-regulated in PsA    |
| RP11-129B9.1   | 0.041273  | 0.962286 Down-regulated in PsA |
| RP11-1399P15.1 | 0.041314  | 0.825979 Down-regulated in PsA |
| VTRNA1-3       | 0.0413143 | 1.42876 Up-regulated in PsA    |
| HIF1AP1        | 0.0413197 | 1.4847 Up-regulated in PsA     |
| LINC01021      | 0.0413725 | 0.856742 Down-regulated in PsA |
| RP11-236J17.6  | 0.0413774 | 0.783512 Down-regulated in PsA |
| SLC39A11       | 0.0413851 | 0.852239 Down-regulated in PsA |
| RP11-737O24.5  | 0.0414037 | 1.27219 Up-regulated in PsA    |
| MIR6068        | 0.041439  | 1.16991 Up-regulated in PsA    |
| TFF3           | 0.0414537 | 0.809001 Down-regulated in PsA |
| AC083875.2     | 0.0414561 | 0.799365 Down-regulated in PsA |
| Y_RNA          | 0.0415042 | 1.27859 Up-regulated in PsA    |
| Metazoa_SRP    | 0.0415226 | 1.41453 Up-regulated in PsA    |

|               |           |                                |
|---------------|-----------|--------------------------------|
| RP11-449P1.1  | 0.041548  | 1.09686 Up-regulated in PsA    |
| NRN1L         | 0.0415521 | 1.18582 Up-regulated in PsA    |
| RP11-571M6.18 | 0.0415817 | 1.09394 Up-regulated in PsA    |
| TYW1B         | 0.0415959 | 0.655241 Down-regulated in PsA |
| TCEB1P30      | 0.0416125 | 0.768971 Down-regulated in PsA |
| KIAA2022      | 0.0416434 | 0.527109 Down-regulated in PsA |
| LCN12         | 0.041672  | 0.802293 Down-regulated in PsA |
| RP11-989E6.3  | 0.0416803 | 1.22631 Up-regulated in PsA    |
| SLIT1-AS1     | 0.0417173 | 1.54009 Up-regulated in PsA    |
| TCP1          | 0.0417218 | 0.799676 Down-regulated in PsA |
| RN7SL834P     | 0.0417558 | 0.884299 Down-regulated in PsA |
| ARHGEF39      | 0.0417723 | 0.67165 Down-regulated in PsA  |
| RP5-1163L11.2 | 0.0418073 | 1.31571 Up-regulated in PsA    |
| BIRC6         | 0.0418337 | 0.829271 Down-regulated in PsA |
| OR4E1         | 0.0418358 | 1.03492 Up-regulated in PsA    |
| RPL21P112     | 0.041866  | 0.716047 Down-regulated in PsA |
| BTBD3         | 0.0418739 | 0.842632 Down-regulated in PsA |
| DFFA          | 0.0418897 | 0.703108 Down-regulated in PsA |
| RP11-315I20.1 | 0.0419027 | 1.30345 Up-regulated in PsA    |
| AC006445.7    | 0.0419123 | 1.11773 Up-regulated in PsA    |
| CHST15        | 0.0419161 | 0.771654 Down-regulated in PsA |
| MYCNOS        | 0.0419384 | 1.3062 Up-regulated in PsA     |
| POLR3GP2      | 0.0419418 | 1.22303 Up-regulated in PsA    |
| RP5-919F19.5  | 0.0419557 | 1.4853 Up-regulated in PsA     |
| AC092071.1    | 0.0419657 | 1.23972 Up-regulated in PsA    |



|              |           |                                |
|--------------|-----------|--------------------------------|
| YBEY         | 0.0419667 | 0.296686 Down-regulated in PsA |
| EPHB1        | 0.0420257 | 1.37569 Up-regulated in PsA    |
| LOC101929723 | 0.0420288 | 0.83993 Down-regulated in PsA  |
| TNS2         | 0.0420527 | 1.10864 Up-regulated in PsA    |
| GNB3         | 0.0420545 | 1.05382 Up-regulated in PsA    |
| MSH2         | 0.0420625 | 0.49034 Down-regulated in PsA  |
| ADIPOQ       | 0.042106  | 0.896843 Down-regulated in PsA |
| RPE65        | 0.0421174 | 0.749081 Down-regulated in PsA |
| IQSEC2       | 0.0421539 | 0.935876 Down-regulated in PsA |
| PLXNC1       | 0.0421679 | 0.816225 Down-regulated in PsA |
| RNA5SP484    | 0.0422561 | 1.34866 Up-regulated in PsA    |
| RP11-803D5.1 | 0.0422818 | 0.538036 Down-regulated in PsA |
| RIF1         | 0.0423357 | 1.31662 Up-regulated in PsA    |
| PSMD2        | 0.0423367 | 0.798864 Down-regulated in PsA |
| DIDO1        | 0.0423433 | 0.885964 Down-regulated in PsA |
| TIAL1        | 0.0423566 | 0.884024 Down-regulated in PsA |
| RP11-17G12.2 | 0.0423675 | 1.05013 Up-regulated in PsA    |
| RP11-56B16.5 | 0.0423751 | 1.3179 Up-regulated in PsA     |
| RN7SL538P    | 0.0423863 | 1.5004 Up-regulated in PsA     |
| RP11-182E7.1 | 0.0424214 | 1.15443 Up-regulated in PsA    |
| EIF1AD       | 0.0424453 | 0.821971 Down-regulated in PsA |
| MAP2K6       | 0.0424516 | 0.700403 Down-regulated in PsA |
| RN7SL314P    | 0.042476  | 1.1985 Up-regulated in PsA     |
| ABCE1        | 0.0425862 | 0.763275 Down-regulated in PsA |
| TCF12        | 0.0426052 | 0.750535 Down-regulated in PsA |

|               |           |                                |
|---------------|-----------|--------------------------------|
| RP11-521B24.5 | 0.0426116 | 1.23872 Up-regulated in PsA    |
| RP11-471B22.2 | 0.0426636 | 0.950337 Down-regulated in PsA |
| BBOX1         | 0.0426717 | 1.31701 Up-regulated in PsA    |
| AL050303.10   | 0.0426799 | 1.40207 Up-regulated in PsA    |
| RP11-88I18.2  | 0.0426824 | 0.450051 Down-regulated in PsA |
| XKR8          | 0.0426988 | 1.21121 Up-regulated in PsA    |
| MOXD1         | 0.0427049 | 1.26167 Up-regulated in PsA    |
| RP1-131F15.2  | 0.0427875 | 1.23156 Up-regulated in PsA    |
| SPEF1         | 0.0428185 | 0.754548 Down-regulated in PsA |
| MTCO1P28      | 0.0428656 | 1.32937 Up-regulated in PsA    |
| Y_RNA         | 0.0428949 | 1.19364 Up-regulated in PsA    |
| EIF2B4        | 0.0429006 | 0.863847 Down-regulated in PsA |
| MIR320B1      | 0.0429021 | 1.5184 Up-regulated in PsA     |
| RP11-18O11.1  | 0.0429098 | 1.30044 Up-regulated in PsA    |
| RP11-467P9.1  | 0.0429298 | 1.08503 Up-regulated in PsA    |
| MIR4520-2     | 0.0429781 | 0.838398 Down-regulated in PsA |
| TMEM216       | 0.0429939 | 0.853228 Down-regulated in PsA |
| CBR3          | 0.0430077 | 0.66133 Down-regulated in PsA  |
| C11orf57      | 0.0430093 | 0.706504 Down-regulated in PsA |
| ADPRH         | 0.0430095 | 0.807917 Down-regulated in PsA |
| FTH1P12       | 0.0430221 | 1.08309 Up-regulated in PsA    |
| CTD-2620I22.2 | 0.0430221 | 0.874252 Down-regulated in PsA |
| LINC01571     | 0.0430289 | 0.761442 Down-regulated in PsA |
| TDO2          | 0.0430335 | 0.656721 Down-regulated in PsA |
| HNCAT21       | 0.0430396 | 1.21111 Up-regulated in PsA    |

|               |           |                                |
|---------------|-----------|--------------------------------|
| Y_RNA         | 0.043056  | 1.06708 Up-regulated in PsA    |
| GABRQ         | 0.043084  | 0.750789 Down-regulated in PsA |
| RP11-343D2.11 | 0.0430893 | 0.736209 Down-regulated in PsA |
| RN7SL513P     | 0.0431073 | 1.4155 Up-regulated in PsA     |
| RP11-1060G2.2 | 0.0431246 | 1.28688 Up-regulated in PsA    |
| SNORD99       | 0.0431773 | 1.23466 Up-regulated in PsA    |
| LOC100287632  | 0.0431892 | 0.781942 Down-regulated in PsA |
| XPA           | 0.0432098 | 0.701987 Down-regulated in PsA |
| RP11-545A16.3 | 0.0432119 | 1.11336 Up-regulated in PsA    |
| IDO1          | 0.043219  | 0.869346 Down-regulated in PsA |
| ARNTL         | 0.0432254 | 0.801228 Down-regulated in PsA |
| PKM           | 0.043228  | 0.886129 Down-regulated in PsA |
| WI2-88277B6.1 | 0.0432449 | 1.13436 Up-regulated in PsA    |
| CC2D2B        | 0.0432573 | 0.49821 Down-regulated in PsA  |
| IGBP1-AS1     | 0.0433002 | 0.67492 Down-regulated in PsA  |
| MRPS28        | 0.043371  | 0.670346 Down-regulated in PsA |
| CTD-3193K9.3  | 0.0433764 | 0.67312 Down-regulated in PsA  |
| ALS2CL        | 0.0433791 | 0.823267 Down-regulated in PsA |
| FOXJ1         | 0.0433852 | 1.18553 Up-regulated in PsA    |
| ARL2BP        | 0.0434055 | 0.814123 Down-regulated in PsA |
| RP11-805F19.3 | 0.0434542 | 1.17231 Up-regulated in PsA    |
| LGALS13       | 0.0434645 | 0.777559 Down-regulated in PsA |
| RP3-521E19.3  | 0.0434706 | 1.14245 Up-regulated in PsA    |
| OR4X2         | 0.0434755 | 0.838863 Down-regulated in PsA |
| LINC00336     | 0.0434802 | 1.27899 Up-regulated in PsA    |

|               |           |                                |
|---------------|-----------|--------------------------------|
| RP11-857B24.1 | 0.0434903 | 1.07578 Up-regulated in PsA    |
| POT1          | 0.0434923 | 0.719305 Down-regulated in PsA |
| USP17L3       | 0.0434959 | 0.75065 Down-regulated in PsA  |
| SCG5          | 0.0435159 | 1.21333 Up-regulated in PsA    |
| FOXD4L5       | 0.0435273 | 0.817762 Down-regulated in PsA |
| RPL31P15      | 0.0435305 | 0.766325 Down-regulated in PsA |
| RPS8P6        | 0.0435409 | 1.12997 Up-regulated in PsA    |
| AC006026.13   | 0.0435421 | 0.799596 Down-regulated in PsA |
| C15orf62      | 0.0435908 | 0.699108 Down-regulated in PsA |
| Metazoa_SRP   | 0.0435967 | 1.34684 Up-regulated in PsA    |
| MIR4452       | 0.0436074 | 1.43023 Up-regulated in PsA    |
| RP11-660L16.2 | 0.0436076 | 1.28853 Up-regulated in PsA    |
| FAM174B       | 0.0436522 | 0.893177 Down-regulated in PsA |
| KRT8P29       | 0.0436688 | 1.56961 Up-regulated in PsA    |
| OSGEP         | 0.043684  | 0.806287 Down-regulated in PsA |
| AC009237.16   | 0.0437039 | 1.35544 Up-regulated in PsA    |
| LINC00909     | 0.0437358 | 0.691776 Down-regulated in PsA |
| LRIG1         | 0.043751  | 0.853764 Down-regulated in PsA |
| TMEM165       | 0.0437572 | 0.635082 Down-regulated in PsA |
| HDDC2         | 0.0437581 | 0.722591 Down-regulated in PsA |
| PPHLN1        | 0.04376   | 0.900165 Down-regulated in PsA |
| RP11-655G22.2 | 0.0437608 | 1.3061 Up-regulated in PsA     |
| RP11-24J19.1  | 0.0437748 | 1.06822 Up-regulated in PsA    |
| SSU72P1       | 0.04378   | 0.662723 Down-regulated in PsA |
| STK19         | 0.0437861 | 0.795134 Down-regulated in PsA |

|               |           |                                |
|---------------|-----------|--------------------------------|
| RBPJP2        | 0.0437947 | 0.729923 Down-regulated in PsA |
| LOC728024     | 0.0438117 | 0.68354 Down-regulated in PsA  |
| RPS4XP4       | 0.0438546 | 1.35721 Up-regulated in PsA    |
| DGKD          | 0.0438934 | 0.767928 Down-regulated in PsA |
| CTC-480C2.1   | 0.0438947 | 1.25841 Up-regulated in PsA    |
| CDKN2B-AS1    | 0.0439001 | 0.676653 Down-regulated in PsA |
| AP1AR         | 0.0439217 | 0.624806 Down-regulated in PsA |
| RP11-309M23.1 | 0.0439263 | 0.732353 Down-regulated in PsA |
| RP11-309M23.1 | 0.0439263 | 0.732353 Down-regulated in PsA |
| TNFRSF13B     | 0.0439299 | 1.03286 Up-regulated in PsA    |
| RP11-432M8.4  | 0.0439409 | 1.23137 Up-regulated in PsA    |
| EDAR          | 0.043941  | 1.07753 Up-regulated in PsA    |
| PRORY         | 0.0439493 | 0.759397 Down-regulated in PsA |
| CICP10        | 0.0439748 | 1.16576 Up-regulated in PsA    |
| RP11-569G9.7  | 0.0439801 | 0.802539 Down-regulated in PsA |
| RP11-462L8.2  | 0.043984  | 0.872386 Down-regulated in PsA |
| SPAG16        | 0.043985  | 0.881294 Down-regulated in PsA |
| RP11-109M19.1 | 0.0439902 | 1.4593 Up-regulated in PsA     |
| RPS27P22      | 0.0440264 | 1.19604 Up-regulated in PsA    |
| UBE2J2        | 0.0440438 | 0.750234 Down-regulated in PsA |
| LINC01572     | 0.0440586 | 1.29033 Up-regulated in PsA    |
| SRP14-AS1     | 0.0440777 | 0.637111 Down-regulated in PsA |
| RN7SL756P     | 0.0441002 | 1.27958 Up-regulated in PsA    |
| EPRS          | 0.0441325 | 0.767188 Down-regulated in PsA |
| MEAF6P1       | 0.0441348 | 1.23138 Up-regulated in PsA    |

|               |           |                                |
|---------------|-----------|--------------------------------|
| RP11-452G18.1 | 0.0441762 | 0.789995 Down-regulated in PsA |
| LOC101927915  | 0.0442082 | 0.825059 Down-regulated in PsA |
| RP11-312A15.3 | 0.0442193 | 1.10293 Up-regulated in PsA    |
| LOC102724502  | 0.0442298 | 1.2186 Up-regulated in PsA     |
| MFHAS1        | 0.0442598 | 0.837865 Down-regulated in PsA |
| RP11-291L22.4 | 0.0442611 | 0.782562 Down-regulated in PsA |
| RP11-316J7.4  | 0.0442668 | 1.46498 Up-regulated in PsA    |
| CTD-3064H18.4 | 0.0442676 | 1.3753 Up-regulated in PsA     |
| CYCSP27       | 0.044315  | 0.730553 Down-regulated in PsA |
| CSPG4P1Y      | 0.0443328 | 1.70263 Up-regulated in PsA    |
| RP11-332J15.3 | 0.0443652 | 1.16619 Up-regulated in PsA    |
| RP11-5P18.11  | 0.0443715 | 1.09266 Up-regulated in PsA    |
| ARL14EPL      | 0.0443716 | 0.760522 Down-regulated in PsA |
| PQLC2         | 0.044373  | 0.75672 Down-regulated in PsA  |
| RP11-275I4.2  | 0.044388  | 0.704935 Down-regulated in PsA |
| TAL2          | 0.0444149 | 0.698817 Down-regulated in PsA |
| KDM4A-AS1     | 0.0444244 | 0.909005 Down-regulated in PsA |
| LOC645513     | 0.0444354 | 0.841026 Down-regulated in PsA |
| PCAT14        | 0.0444358 | 1.24917 Up-regulated in PsA    |
| CYP4F8        | 0.0444453 | 0.915337 Down-regulated in PsA |
| RP11-575C1.1  | 0.0444637 | 0.72765 Down-regulated in PsA  |
| DDX39BP2      | 0.0444866 | 0.700923 Down-regulated in PsA |
| RP11-813B8.1  | 0.0445204 | 1.15556 Up-regulated in PsA    |
| HYAL3         | 0.0445319 | 0.606236 Down-regulated in PsA |
| RP11-358D17.1 | 0.0445638 | 1.15798 Up-regulated in PsA    |

|               |           |                                |
|---------------|-----------|--------------------------------|
| ZNF568        | 0.0445844 | 0.645403 Down-regulated in PsA |
| FOXO6         | 0.0445918 | 1.1657 Up-regulated in PsA     |
| DDX55         | 0.0447003 | 0.916156 Down-regulated in PsA |
| CAPN1         | 0.0447247 | 0.935332 Down-regulated in PsA |
| LINC00463     | 0.044772  | 1.2467 Up-regulated in PsA     |
| RP11-814H16.2 | 0.0447805 | 0.844357 Down-regulated in PsA |
| RPS17P11      | 0.04479   | 1.30166 Up-regulated in PsA    |
| H19_3         | 0.0447981 | 0.797057 Down-regulated in PsA |
| NIPA2         | 0.0448349 | 1.29299 Up-regulated in PsA    |
| HRK           | 0.0448435 | 0.910863 Down-regulated in PsA |
| ZBED5-AS1     | 0.0448682 | 0.673125 Down-regulated in PsA |
| MORC2         | 0.0448998 | 0.85425 Down-regulated in PsA  |
| PRPF38B       | 0.0449274 | 0.826173 Down-regulated in PsA |
| INSR          | 0.0449552 | 0.78806 Down-regulated in PsA  |
| MTG2          | 0.0449578 | 0.802245 Down-regulated in PsA |
| RP11-735A19.2 | 0.0449595 | 1.21217 Up-regulated in PsA    |
| GSTO2         | 0.0449912 | 0.854778 Down-regulated in PsA |
| GAS5-AS1      | 0.045012  | 0.476191 Down-regulated in PsA |
| TAF15         | 0.0450143 | 0.910167 Down-regulated in PsA |
| POU2F1        | 0.0450603 | 0.755019 Down-regulated in PsA |
| SSU72P3       | 0.0450848 | 1.35072 Up-regulated in PsA    |
| PHBP8         | 0.0450921 | 0.837559 Down-regulated in PsA |
| RP11-301G19.1 | 0.0451037 | 1.18124 Up-regulated in PsA    |
| RP11-335K5.2  | 0.0451398 | 1.12941 Up-regulated in PsA    |
| RP1-130G2.1   | 0.0451715 | 0.880288 Down-regulated in PsA |

|               |           |                                |
|---------------|-----------|--------------------------------|
| NLK           | 0.0451718 | 0.787657 Down-regulated in PsA |
| TMPO-AS1      | 0.0452041 | 0.822038 Down-regulated in PsA |
| SURF4         | 0.0452137 | 0.870432 Down-regulated in PsA |
| RP11-79P5.3   | 0.0452452 | 1.08995 Up-regulated in PsA    |
| RP11-300A12.2 | 0.0452489 | 0.688773 Down-regulated in PsA |
| BLOC1S2       | 0.0452542 | 0.794096 Down-regulated in PsA |
| FLG-AS1       | 0.0452778 | 1.36952 Up-regulated in PsA    |
| RP11-483G21.3 | 0.0453144 | 1.08249 Up-regulated in PsA    |
| LINC01143     | 0.0453703 | 1.23966 Up-regulated in PsA    |
| NUP50         | 0.045409  | 0.6174 Down-regulated in PsA   |
| OR4S1         | 0.0454094 | 1.08579 Up-regulated in PsA    |
| ZNF860        | 0.045431  | 0.828176 Down-regulated in PsA |
| RIF1          | 0.0454323 | 0.747668 Down-regulated in PsA |
| RP11-556H2.2  | 0.0454599 | 0.617361 Down-regulated in PsA |
| RNF41         | 0.0454614 | 0.84845 Down-regulated in PsA  |
| SETD6P1       | 0.0454928 | 0.752541 Down-regulated in PsA |
| RP11-700H6.2  | 0.0454932 | 0.782272 Down-regulated in PsA |
| ZNF35         | 0.0455028 | 0.731868 Down-regulated in PsA |
| RP11-457P14.6 | 0.0455391 | 0.77687 Down-regulated in PsA  |
| RP11-574K11.8 | 0.0455606 | 0.688416 Down-regulated in PsA |
| RP11-634H22.1 | 0.045564  | 1.2079 Up-regulated in PsA     |
| SLC26A1       | 0.0455847 | 1.08612 Up-regulated in PsA    |
| RP11-403P14.1 | 0.0456263 | 0.661096 Down-regulated in PsA |
| TARDBPP2      | 0.0456269 | 0.829023 Down-regulated in PsA |
| HMCN2         | 0.045637  | 0.818177 Down-regulated in PsA |



|               |           |                                |
|---------------|-----------|--------------------------------|
| AMDHD1        | 0.0456493 | 0.879505 Down-regulated in PsA |
| RN7SL113P     | 0.0456525 | 1.1382 Up-regulated in PsA     |
| CARD16        | 0.0456626 | 0.826278 Down-regulated in PsA |
| SLC30A2       | 0.0456755 | 1.11985 Up-regulated in PsA    |
| TMEM202       | 0.045712  | 0.852313 Down-regulated in PsA |
| PXK           | 0.0457197 | 0.914961 Down-regulated in PsA |
| SRGAP2D       | 0.0457304 | 0.866789 Down-regulated in PsA |
| LOC102724200  | 0.0457319 | 0.777412 Down-regulated in PsA |
| NR5A1         | 0.0457395 | 0.690137 Down-regulated in PsA |
| AC113167.2    | 0.0457494 | 0.845925 Down-regulated in PsA |
| PACRG-AS3     | 0.0457897 | 0.79759 Down-regulated in PsA  |
| BTN2A3P       | 0.0458001 | 0.775969 Down-regulated in PsA |
| PRRC2CP1      | 0.0458265 | 0.772977 Down-regulated in PsA |
| MACROD2-IT1   | 0.045842  | 1.19691 Up-regulated in PsA    |
| C1orf109      | 0.0458634 | 0.848073 Down-regulated in PsA |
| RN7SL79P      | 0.0458851 | 1.40636 Up-regulated in PsA    |
| ZNF132        | 0.0458894 | 0.627574 Down-regulated in PsA |
| CTB-33O18.2   | 0.0459138 | 0.761303 Down-regulated in PsA |
| SDHDP1        | 0.0459557 | 0.804428 Down-regulated in PsA |
| RP11-174O3.3  | 0.0459749 | 0.647851 Down-regulated in PsA |
| RP11-521C20.3 | 0.0459982 | 0.72081 Down-regulated in PsA  |
| KCNA6         | 0.0460471 | 1.2519 Up-regulated in PsA     |
| ERP29         | 0.046063  | 0.792474 Down-regulated in PsA |
| STK32C        | 0.0460691 | 0.756166 Down-regulated in PsA |
| RAB2B         | 0.0460821 | 0.726235 Down-regulated in PsA |

|               |           |                                |
|---------------|-----------|--------------------------------|
| CDY2A         | 0.0460925 | 1.28608 Up-regulated in PsA    |
| RP11-419L4.1  | 0.0461204 | 0.797195 Down-regulated in PsA |
| TAF1D         | 0.0461349 | 0.777175 Down-regulated in PsA |
| WDR33         | 0.0461901 | 0.859339 Down-regulated in PsA |
| RP11-59H7.1   | 0.0461987 | 1.18223 Up-regulated in PsA    |
| VPS50         | 0.0462003 | 0.649536 Down-regulated in PsA |
| AC005625.1    | 0.0462337 | 1.39621 Up-regulated in PsA    |
| MCM10         | 0.0462348 | 0.716286 Down-regulated in PsA |
| LILRB4        | 0.0462366 | 0.693579 Down-regulated in PsA |
| CBX3P9        | 0.0463068 | 0.747957 Down-regulated in PsA |
| CTC-338M12.1  | 0.0463095 | 1.17791 Up-regulated in PsA    |
| RFC2          | 0.0463431 | 0.748393 Down-regulated in PsA |
| KEAP1         | 0.0463475 | 0.787989 Down-regulated in PsA |
| RP11-196G18.1 | 0.0463492 | 1.28577 Up-regulated in PsA    |
| RP11-327F22.6 | 0.0463671 | 0.634811 Down-regulated in PsA |
| ZNF502        | 0.0463871 | 0.623741 Down-regulated in PsA |
| SNORD115-48   | 0.0464005 | 1.22965 Up-regulated in PsA    |
| AC006942.4    | 0.0464336 | 1.10561 Up-regulated in PsA    |
| HMGB1P19      | 0.0464614 | 0.660718 Down-regulated in PsA |
| LOC101927637  | 0.0464815 | 0.818499 Down-regulated in PsA |
| LRMP          | 0.0464829 | 0.879556 Down-regulated in PsA |
| RPS15AP27     | 0.0464836 | 0.792324 Down-regulated in PsA |
| CTB-164N12.1  | 0.0464874 | 0.688946 Down-regulated in PsA |
| RP11-277A4.4  | 0.0464987 | 1.53174 Up-regulated in PsA    |
| SLC37A3       | 0.0465542 | 1.29882 Up-regulated in PsA    |

|               |           |                                |
|---------------|-----------|--------------------------------|
| TAS2R13       | 0.0465637 | 1.15289 Up-regulated in PsA    |
| CA2           | 0.0465769 | 0.590866 Down-regulated in PsA |
| POLR3A        | 0.0466138 | 0.684474 Down-regulated in PsA |
| MUC13         | 0.0466384 | 1.24603 Up-regulated in PsA    |
| PRKY          | 0.04664   | 0.766577 Down-regulated in PsA |
| TINF2         | 0.0466437 | 0.86253 Down-regulated in PsA  |
| RP4-614N24.1  | 0.0466508 | 0.743064 Down-regulated in PsA |
| RIBC1         | 0.0466512 | 1.05111 Up-regulated in PsA    |
| RP11-596D21.1 | 0.0466601 | 0.840672 Down-regulated in PsA |
| PCGEM1        | 0.046676  | 0.775562 Down-regulated in PsA |
| ARL2-SNX15    | 0.0466919 | 0.859722 Down-regulated in PsA |
| RP11-142G1.3  | 0.0467318 | 1.50001 Up-regulated in PsA    |
| C10orf53      | 0.0467601 | 0.633605 Down-regulated in PsA |
| C2orf42       | 0.0467633 | 0.689628 Down-regulated in PsA |
| GUCY2GP       | 0.0467643 | 1.30926 Up-regulated in PsA    |
| RN7SL796P     | 0.046772  | 1.19459 Up-regulated in PsA    |
| CARD17        | 0.046778  | 0.78939 Down-regulated in PsA  |
| MIR4468       | 0.0468051 | 1.24703 Up-regulated in PsA    |
| TMF1P1        | 0.0468146 | 0.725124 Down-regulated in PsA |
| RP11-467D18.2 | 0.0468294 | 1.43961 Up-regulated in PsA    |
| RP11-480G7.2  | 0.0468294 | 1.34983 Up-regulated in PsA    |
| SYCP1         | 0.0468547 | 0.73088 Down-regulated in PsA  |
| KRT18P7       | 0.0468575 | 0.92939 Down-regulated in PsA  |
| RP11-493L12.5 | 0.0468613 | 1.06918 Up-regulated in PsA    |
| DEFB106B      | 0.0469067 | 0.914115 Down-regulated in PsA |

|                |           |                                |
|----------------|-----------|--------------------------------|
| ID2            | 0.0469126 | 0.959673 Down-regulated in PsA |
| DNM1P35        | 0.0469856 | 1.14199 Up-regulated in PsA    |
| TGIF2-C20orf24 | 0.0470179 | 0.809053 Down-regulated in PsA |
| MYRFL          | 0.0470415 | 0.590101 Down-regulated in PsA |
| HIF3A          | 0.0470449 | 0.888884 Down-regulated in PsA |
| AP000936.4     | 0.0470473 | 1.36269 Up-regulated in PsA    |
| RP11-440J4.2   | 0.047083  | 1.41697 Up-regulated in PsA    |
| AIMP1          | 0.0470861 | 0.907044 Down-regulated in PsA |
| CLDN17         | 0.0471618 | 0.794788 Down-regulated in PsA |
| F11-AS1        | 0.0471633 | 1.09788 Up-regulated in PsA    |
| IKBKB          | 0.0471825 | 0.646689 Down-regulated in PsA |
| CYP51A1P2      | 0.0471897 | 1.3091 Up-regulated in PsA     |
| YME1L1         | 0.0472061 | 0.808339 Down-regulated in PsA |
| RN7SL183P      | 0.0472188 | 1.18083 Up-regulated in PsA    |
| RPS3AP43       | 0.0472205 | 0.825806 Down-regulated in PsA |
| VGLL4          | 0.0472486 | 0.8191 Down-regulated in PsA   |
| HIP1R          | 0.0472695 | 1.13327 Up-regulated in PsA    |
| MKKS           | 0.0472712 | 0.536633 Down-regulated in PsA |
| RP11-884K10.7  | 0.0472733 | 0.581556 Down-regulated in PsA |
| RP11-113E21.3  | 0.0472911 | 0.892122 Down-regulated in PsA |
| BCL2L14        | 0.0472959 | 0.880456 Down-regulated in PsA |
| AC093850.1     | 0.0473851 | 1.27894 Up-regulated in PsA    |
| RPL21P28       | 0.0474009 | 0.912595 Down-regulated in PsA |
| EPB41L1        | 0.047422  | 0.803128 Down-regulated in PsA |
| ZCCHC5         | 0.0474404 | 1.23144 Up-regulated in PsA    |

|               |           |                                |
|---------------|-----------|--------------------------------|
| AC008592.5    | 0.0474458 | 0.901883 Down-regulated in PsA |
| MIR6780B      | 0.0474498 | 1.1585 Up-regulated in PsA     |
| Y_RNA         | 0.0474597 | 1.89194 Up-regulated in PsA    |
| RN7SL815P     | 0.0474749 | 1.48592 Up-regulated in PsA    |
| C8orf87       | 0.0475187 | 0.727192 Down-regulated in PsA |
| CTD-2062F14.3 | 0.0475598 | 1.31072 Up-regulated in PsA    |
| RN7SL787P     | 0.0475648 | 1.11513 Up-regulated in PsA    |
| FLJ46284      | 0.0476033 | 0.512586 Down-regulated in PsA |
| AC006133.3    | 0.0476133 | 1.14398 Up-regulated in PsA    |
| PTCD2P2       | 0.0476352 | 0.755491 Down-regulated in PsA |
| RP11-182L7.1  | 0.0476461 | 1.58501 Up-regulated in PsA    |
| PLA2G4A       | 0.0476546 | 0.661331 Down-regulated in PsA |
| AC067945.2    | 0.0476556 | 0.75111 Down-regulated in PsA  |
| OR9A2         | 0.0476859 | 0.833184 Down-regulated in PsA |
| RP11-85G18.6  | 0.0477033 | 1.35653 Up-regulated in PsA    |
| USP16         | 0.0477433 | 0.853294 Down-regulated in PsA |
| NKX2-5        | 0.047744  | 0.817954 Down-regulated in PsA |
| RP11-622C24.1 | 0.0477919 | 0.763157 Down-regulated in PsA |
| EML4          | 0.0478134 | 0.795303 Down-regulated in PsA |
| DYNLT1        | 0.0478243 | 0.843825 Down-regulated in PsA |
| ZNF587P1      | 0.0478256 | 0.81302 Down-regulated in PsA  |
| MTND6P33      | 0.04793   | 1.23416 Up-regulated in PsA    |
| RP11-567B20.1 | 0.0479329 | 1.28966 Up-regulated in PsA    |
| MTCYBP9       | 0.0479355 | 0.826529 Down-regulated in PsA |
| TDRD7         | 0.0479358 | 0.751329 Down-regulated in PsA |

|              |           |                                |
|--------------|-----------|--------------------------------|
| DTX3         | 0.0479509 | 0.745226 Down-regulated in PsA |
| DGUOK        | 0.0479893 | 0.860819 Down-regulated in PsA |
| FMO6P        | 0.0480346 | 1.32902 Up-regulated in PsA    |
| RP11-47A8.5  | 0.0480358 | 1.16993 Up-regulated in PsA    |
| bP-21201H5.2 | 0.0480398 | 0.401065 Down-regulated in PsA |
| PRR4         | 0.0480486 | 0.582164 Down-regulated in PsA |
| GLRX5        | 0.0480625 | 0.901084 Down-regulated in PsA |
| MIR6512      | 0.0480729 | 1.10941 Up-regulated in PsA    |
| RPL36AP41    | 0.0481057 | 0.889649 Down-regulated in PsA |
| KIAA1456     | 0.0481605 | 1.16662 Up-regulated in PsA    |
| PRAMEF9      | 0.0481676 | 0.89509 Down-regulated in PsA  |
| MIR23A       | 0.0481703 | 1.33884 Up-regulated in PsA    |
| NSUN2        | 0.0481771 | 0.77048 Down-regulated in PsA  |
| EDEM2        | 0.048181  | 0.88874 Down-regulated in PsA  |
| ZNF775       | 0.0482074 | 0.9397 Down-regulated in PsA   |
| CTC-366B18.4 | 0.0482252 | 0.662996 Down-regulated in PsA |
| RP5-1112D6.8 | 0.0482516 | 0.486985 Down-regulated in PsA |
| ABCG8        | 0.0482626 | 0.896946 Down-regulated in PsA |
| DEFB126      | 0.0482653 | 0.816187 Down-regulated in PsA |
| SLC35B3      | 0.0482809 | 0.520394 Down-regulated in PsA |
| BX842568.4   | 0.0482839 | 1.30738 Up-regulated in PsA    |
| LINC00488    | 0.0482933 | 1.73816 Up-regulated in PsA    |
| DPP3P2       | 0.048297  | 0.799491 Down-regulated in PsA |
| CHIC2        | 0.0482999 | 0.703045 Down-regulated in PsA |
| TCEB1P5      | 0.0483126 | 0.782294 Down-regulated in PsA |

|               |           |                                |
|---------------|-----------|--------------------------------|
| C6orf203      | 0.0483285 | 0.80889 Down-regulated in PsA  |
| UBR3          | 0.0483313 | 0.772356 Down-regulated in PsA |
| DCAF8         | 0.0483647 | 0.829344 Down-regulated in PsA |
| RP11-13M3.1   | 0.048365  | 1.73108 Up-regulated in PsA    |
| NUP210        | 0.0483721 | 0.808567 Down-regulated in PsA |
| APC           | 0.0483943 | 0.817557 Down-regulated in PsA |
| NOB1          | 0.0483946 | 0.876966 Down-regulated in PsA |
| P3H3          | 0.0484023 | 1.16724 Up-regulated in PsA    |
| ZFAND6        | 0.0484792 | 0.81675 Down-regulated in PsA  |
| AGO3          | 0.0484845 | 0.751993 Down-regulated in PsA |
| RP11-182N22.9 | 0.0484995 | 1.2939 Up-regulated in PsA     |
| LINC00284     | 0.048517  | 0.799284 Down-regulated in PsA |
| ANAPC1P1      | 0.0485214 | 0.697473 Down-regulated in PsA |
| TRIM32        | 0.0485413 | 0.672483 Down-regulated in PsA |
| HIST1H2BM     | 0.0485894 | 1.60167 Up-regulated in PsA    |
| RP11-580I16.2 | 0.0486138 | 0.872654 Down-regulated in PsA |
| C21orf58      | 0.0486145 | 0.691364 Down-regulated in PsA |
| RP11-388E23.2 | 0.0486523 | 1.1711 Up-regulated in PsA     |
| RP11-799M12.2 | 0.0486901 | 0.424517 Down-regulated in PsA |
| MIR3130-2     | 0.0487054 | 0.812464 Down-regulated in PsA |
| ADAM24P       | 0.0487152 | 1.22391 Up-regulated in PsA    |
| CTC-436P18.4  | 0.0487166 | 1.11897 Up-regulated in PsA    |
| LOC100506858  | 0.0487291 | 1.11784 Up-regulated in PsA    |
| RFWD2         | 0.0487315 | 0.7693 Down-regulated in PsA   |
| GGT7          | 0.0487393 | 0.819082 Down-regulated in PsA |

|                   |           |                                |
|-------------------|-----------|--------------------------------|
| RECQL5            | 0.0487451 | 0.787332 Down-regulated in PsA |
| RP11-585K6.2      | 0.0487696 | 1.1982 Up-regulated in PsA     |
| ATP2B4            | 0.0487986 | 0.829928 Down-regulated in PsA |
| RP11-27M5.1       | 0.0488695 | 0.859464 Down-regulated in PsA |
| RANGAP1           | 0.0488697 | 0.912863 Down-regulated in PsA |
| ACLY              | 0.0488781 | 0.846947 Down-regulated in PsA |
| GPR143            | 0.0489021 | 1.06384 Up-regulated in PsA    |
| LL22NC03-30E12.13 | 0.0489092 | 0.920143 Down-regulated in PsA |
| GPC2              | 0.0489365 | 0.780743 Down-regulated in PsA |
| RP11-510M2.1      | 0.04894   | 1.30249 Up-regulated in PsA    |
| RP11-400N13.1     | 0.0489501 | 1.31173 Up-regulated in PsA    |
| RP11-94D20.1      | 0.0489707 | 1.21928 Up-regulated in PsA    |
| RP11-72M10.4      | 0.0490007 | 1.18392 Up-regulated in PsA    |
| RP11-75D3.1       | 0.0490092 | 0.797983 Down-regulated in PsA |
| RPL7A             | 0.049028  | 1.02943 Up-regulated in PsA    |
| IL20RB-AS1        | 0.0490495 | 1.2024 Up-regulated in PsA     |
| BMP15             | 0.0490515 | 0.809734 Down-regulated in PsA |
| TRAPPC9           | 0.0490627 | 1.2215 Up-regulated in PsA     |
| RP11-298O21.2     | 0.0490821 | 0.728398 Down-regulated in PsA |
| RP11-848D3.4      | 0.0491019 | 1.24315 Up-regulated in PsA    |
| AC012593.1        | 0.0491159 | 0.657887 Down-regulated in PsA |
| UTP20             | 0.0491199 | 0.595066 Down-regulated in PsA |
| TRAM2             | 0.0491283 | 0.795822 Down-regulated in PsA |
| RP4-635A23.4      | 0.0491592 | 0.76447 Down-regulated in PsA  |
| RP11-686F15.2     | 0.0491811 | 0.746976 Down-regulated in PsA |



|               |           |                                |
|---------------|-----------|--------------------------------|
| RNU6-101P     | 0.0491852 | 1.0603 Up-regulated in PsA     |
| RP11-98D18.17 | 0.0491921 | 1.1035 Up-regulated in PsA     |
| RP11-226P1.1  | 0.0491997 | 0.665215 Down-regulated in PsA |
| ENKUR         | 0.0492017 | 1.40405 Up-regulated in PsA    |
| KLF13         | 0.0492147 | 0.710764 Down-regulated in PsA |
| CHRND         | 0.0492755 | 0.790776 Down-regulated in PsA |
| LOC284788     | 0.049277  | 1.24844 Up-regulated in PsA    |
| RP11-1000B6.2 | 0.0492781 | 1.24727 Up-regulated in PsA    |
| RP11-386M24.8 | 0.0492862 | 0.92627 Down-regulated in PsA  |
| RP11-555G19.2 | 0.0492965 | 0.661768 Down-regulated in PsA |
| ANKRD27       | 0.0493031 | 0.668384 Down-regulated in PsA |
| SCARNA23      | 0.0493115 | 1.91568 Up-regulated in PsA    |
| ATG4A         | 0.0493226 | 0.705562 Down-regulated in PsA |
| P2RX2         | 0.0493339 | 0.818287 Down-regulated in PsA |
| KDM3B         | 0.0493652 | 0.815604 Down-regulated in PsA |
| PEX6          | 0.0493675 | 0.845834 Down-regulated in PsA |
| AP000962.1    | 0.0493726 | 0.636498 Down-regulated in PsA |
| SMPD3         | 0.0493779 | 1.36935 Up-regulated in PsA    |
| THEM5         | 0.0493835 | 1.20234 Up-regulated in PsA    |
| LINC01080     | 0.0493919 | 0.689799 Down-regulated in PsA |
| DEFB123       | 0.0494022 | 0.791234 Down-regulated in PsA |
| C2orf88       | 0.0494174 | 1.32627 Up-regulated in PsA    |
| RP11-240E2.2  | 0.049424  | 0.732995 Down-regulated in PsA |
| RP11-295G20.2 | 0.0494321 | 0.814687 Down-regulated in PsA |
| RP11-115A15.4 | 0.0494605 | 1.34107 Up-regulated in PsA    |

|               |           |                                |
|---------------|-----------|--------------------------------|
| PKNOX2-AS1    | 0.0494718 | 0.843678 Down-regulated in PsA |
| LUC7L         | 0.0494759 | 0.829749 Down-regulated in PsA |
| MIR6829       | 0.049495  | 1.20317 Up-regulated in PsA    |
| AC007365.4    | 0.0494964 | 1.30377 Up-regulated in PsA    |
| WSCD2         | 0.0495189 | 0.664841 Down-regulated in PsA |
| ZNF546        | 0.0495353 | 0.903616 Down-regulated in PsA |
| AC074117.13   | 0.0495549 | 0.879415 Down-regulated in PsA |
| HMG2N2P1      | 0.0495912 | 0.793912 Down-regulated in PsA |
| CTD-2534J5.1  | 0.0496075 | 0.802192 Down-regulated in PsA |
| AC005943.6    | 0.0496353 | 1.26054 Up-regulated in PsA    |
| MIR302C       | 0.0496642 | 0.804858 Down-regulated in PsA |
| FGF22         | 0.0496875 | 0.840509 Down-regulated in PsA |
| LOC339059     | 0.0497279 | 1.14757 Up-regulated in PsA    |
| SNORD4A       | 0.0497368 | 1.30849 Up-regulated in PsA    |
| RP11-548K12.2 | 0.0497571 | 1.32019 Up-regulated in PsA    |
| RP11-148O21.4 | 0.0497598 | 0.706894 Down-regulated in PsA |
| CTD-2282P23.1 | 0.0497667 | 1.3466 Up-regulated in PsA     |
| RNF138P2      | 0.0497668 | 1.10276 Up-regulated in PsA    |
| ZCWPW2        | 0.0497748 | 0.898568 Down-regulated in PsA |
| RP11-335O13.8 | 0.0497798 | 1.20831 Up-regulated in PsA    |
| LOC105369785  | 0.0497902 | 1.31082 Up-regulated in PsA    |
| RP11-62H7.3   | 0.0498165 | 0.830792 Down-regulated in PsA |
| MSX2          | 0.0498247 | 0.82666 Down-regulated in PsA  |
| AMD1P2        | 0.049828  | 1.20477 Up-regulated in PsA    |
| AMD1P2        | 0.049828  | 1.20477 Up-regulated in PsA    |

|              |           |                                |
|--------------|-----------|--------------------------------|
| NIPBL        | 0.0498919 | 0.68871 Down-regulated in PsA  |
| FCRL6        | 0.0499101 | 1.19096 Up-regulated in PsA    |
| E2F3P1       | 0.0499363 | 1.07991 Up-regulated in PsA    |
| LCMT1-AS1    | 0.0499427 | 0.855509 Down-regulated in PsA |
| SRIP3        | 0.049943  | 0.911923 Down-regulated in PsA |
| RUNDC3A      | 0.049977  | 0.86613 Down-regulated in PsA  |
| CTC-281M20.3 | 0.0499888 | 1.16983 Up-regulated in PsA    |
| FAM66B       | 0.0499955 | 1.19834 Up-regulated in PsA    |

**Supplementary Table S3. The output result of pathway enrichment analysis by Partek Genomics Suite 7.0 based on the up-regulated genes in PsA samples.** Enrichment -p-value was calculated based on hyper-geometric distribution.

| Pathway Name                                        | Enrichment |         | Pathway ID                 |
|-----------------------------------------------------|------------|---------|----------------------------|
|                                                     | Database   | Score   |                            |
| Cytokine-cytokine receptor interaction              | kegg       | 4.94864 | 0.00709306 kegg_pathway_27 |
| PPAR signaling pathway                              | kegg       | 4.03418 | 0.0177002 kegg_pathway_13  |
| Phenylalanine, tyrosine and tryptophan biosynthesis | kegg       | 2.7063  | 0.0667835 kegg_pathway_271 |
| Olfactory transduction                              | kegg       | 2.50101 | 0.0820019 kegg_pathway_100 |
| Synaptic vesicle cycle                              | kegg       | 2.36201 | 0.0942306 kegg_pathway_91  |
| Taste transduction                                  | kegg       | 2.27745 | 0.102545 kegg_pathway_101  |
| Nicotine addiction                                  | kegg       | 2.26308 | 0.10403 kegg_pathway_148   |
| Chemokine signaling pathway                         | kegg       | 2.1217  | 0.119828 kegg_pathway_28   |
| Protein digestion and absorption                    | kegg       | 2.07102 | 0.126057 kegg_pathway_135  |
| Basal transcription factors                         | kegg       | 2.06781 | 0.126463 kegg_pathway_8    |
| Cysteine and methionine metabolism                  | kegg       | 2.03196 | 0.131079 kegg_pathway_262  |
| Sphingolipid metabolism                             | kegg       | 1.99706 | 0.135734 kegg_pathway_299  |
| Ubiquinone and other terpenoid-quinone biosynthesis | kegg       | 1.95819 | 0.141114 kegg_pathway_253  |
| Regulation of lipolysis in adipocytes               | kegg       | 1.74786 | 0.174147 kegg_pathway_118  |
| Insulin resistance                                  | kegg       | 1.68802 | 0.184886 kegg_pathway_122  |
| Neuroactive ligand-receptor interaction             | kegg       | 1.68478 | 0.185485 kegg_pathway_34   |
| Glycosphingolipid biosynthesis - ganglio series     | kegg       | 1.67463 | 0.187377 kegg_pathway_302  |
| Serotonergic synapse                                | kegg       | 1.61526 | 0.198839 kegg_pathway_96   |
| Phenylalanine metabolism                            | kegg       | 1.56267 | 0.209575 kegg_pathway_269  |
| Primary bile acid biosynthesis                      | kegg       | 1.56267 | 0.209575 kegg_pathway_252  |

|                                           |      |         |          |                  |
|-------------------------------------------|------|---------|----------|------------------|
| Mitophagy - animal                        | kegg | 1.49536 | 0.224167 | kegg_pathway_223 |
| Alcoholism                                | kegg | 1.45252 | 0.233979 | kegg_pathway_149 |
| Axon guidance                             | kegg | 1.43995 | 0.23694  | kegg_pathway_59  |
| Adipocytokine signaling pathway           | kegg | 1.40851 | 0.244508 | kegg_pathway_115 |
| Relaxin signaling pathway                 | kegg | 1.33093 | 0.264232 | kegg_pathway_55  |
| Biosynthesis of amino acids               | kegg | 1.30921 | 0.270033 | kegg_pathway_330 |
| Mannose type O-glycan biosynthesis        | kegg | 1.29966 | 0.272625 | kegg_pathway_284 |
| Histidine metabolism                      | kegg | 1.29966 | 0.272625 | kegg_pathway_267 |
| Proximal tubule bicarbonate reclamation   | kegg | 1.29966 | 0.272625 | kegg_pathway_129 |
| ECM-receptor interaction                  | kegg | 1.16859 | 0.310805 | kegg_pathway_64  |
| Fatty acid elongation                     | kegg | 1.16519 | 0.311864 | kegg_pathway_248 |
| Peroxisome                                | kegg | 1.1524  | 0.315877 | kegg_pathway_46  |
| Retrograde endocannabinoid signaling      | kegg | 1.10296 | 0.331887 | kegg_pathway_93  |
| cAMP signaling pathway                    | kegg | 1.10243 | 0.332063 | kegg_pathway_26  |
| Regulation of actin cytoskeleton          | kegg | 1.09304 | 0.335196 | kegg_pathway_104 |
| Non-alcoholic fatty liver disease (NAFLD) | kegg | 1.09165 | 0.335663 | kegg_pathway_123 |
| Pentose phosphate pathway                 | kegg | 1.07907 | 0.33991  | kegg_pathway_242 |
| Ribosome                                  | kegg | 1.06941 | 0.343212 | kegg_pathway_3   |
| GABAergic synapse                         | kegg | 1.06098 | 0.346117 | kegg_pathway_97  |
| RNA polymerase                            | kegg | 1.05267 | 0.349005 | kegg_pathway_7   |
| beta-Alanine metabolism                   | kegg | 1.05267 | 0.349005 | kegg_pathway_272 |
| Morphine addiction                        | kegg | 1.03252 | 0.356107 | kegg_pathway_147 |
| Autophagy - other                         | kegg | 1.02729 | 0.357976 | kegg_pathway_224 |
| PI3K-Akt signaling pathway                | kegg | 1.02609 | 0.358404 | kegg_pathway_48  |
| Small cell lung cancer                    | kegg | 1.005   | 0.366044 | kegg_pathway_191 |

|                                                      |      |          |          |                  |
|------------------------------------------------------|------|----------|----------|------------------|
| Apoptosis - multiple species                         | kegg | 1.00287  | 0.366824 | kegg_pathway_211 |
| Fructose and mannose metabolism                      | kegg | 1.00287  | 0.366824 | kegg_pathway_244 |
| Base excision repair                                 | kegg | 0.979361 | 0.375551 | kegg_pathway_14  |
| SNARE interactions in vesicular transport            | kegg | 0.979361 | 0.375551 | kegg_pathway_40  |
| Endocrine resistance                                 | kegg | 0.978371 | 0.375923 | kegg_pathway_215 |
| Amoebiasis                                           | kegg | 0.965379 | 0.380839 | kegg_pathway_163 |
| Circadian entrainment                                | kegg | 0.952592 | 0.38574  | kegg_pathway_89  |
| Tyrosine metabolism                                  | kegg | 0.934837 | 0.39265  | kegg_pathway_268 |
| Starch and sucrose metabolism                        | kegg | 0.934837 | 0.39265  | kegg_pathway_279 |
| DNA replication                                      | kegg | 0.934837 | 0.39265  | kegg_pathway_9   |
| HIF-1 signaling pathway                              | kegg | 0.915439 | 0.400341 | kegg_pathway_30  |
| AGE-RAGE signaling pathway in diabetic complications | kegg | 0.915439 | 0.400341 | kegg_pathway_208 |
| Primary immunodeficiency                             | kegg | 0.913734 | 0.401024 | kegg_pathway_202 |
| NF-kappa B signaling pathway                         | kegg | 0.903441 | 0.405173 | kegg_pathway_29  |
| Glucagon signaling pathway                           | kegg | 0.891632 | 0.409986 | kegg_pathway_117 |
| Ferroptosis                                          | kegg | 0.854566 | 0.425468 | kegg_pathway_225 |
| Endocytosis                                          | kegg | 0.846186 | 0.429048 | kegg_pathway_44  |
| Pathways in cancer                                   | kegg | 0.812625 | 0.443692 | kegg_pathway_173 |
| Fatty acid degradation                               | kegg | 0.784105 | 0.456528 | kegg_pathway_249 |
| Cholinergic synapse                                  | kegg | 0.782997 | 0.457034 | kegg_pathway_95  |
| Hedgehog signaling pathway                           | kegg | 0.751989 | 0.471428 | kegg_pathway_57  |
| Intestinal immune network for IgA production         | kegg | 0.751989 | 0.471428 | kegg_pathway_87  |
| Notch signaling pathway                              | kegg | 0.721703 | 0.485924 | kegg_pathway_56  |
| Ovarian steroidogenesis                              | kegg | 0.707199 | 0.493023 | kegg_pathway_108 |

|                                         |      |          |          |                  |
|-----------------------------------------|------|----------|----------|------------------|
| Huntington disease                      | kegg | 0.699397 | 0.496885 | kegg_pathway_143 |
| Arginine and proline metabolism         | kegg | 0.693095 | 0.500026 | kegg_pathway_266 |
| Cholesterol metabolism                  | kegg | 0.693095 | 0.500026 | kegg_pathway_232 |
| Mineral absorption                      | kegg | 0.679378 | 0.506932 | kegg_pathway_139 |
| Osteoclast differentiation              | kegg | 0.655537 | 0.519163 | kegg_pathway_61  |
| Autophagy - animal                      | kegg | 0.63932  | 0.527651 | kegg_pathway_41  |
| FoxO signaling pathway                  | kegg | 0.615823 | 0.540196 | kegg_pathway_31  |
| Systemic lupus erythematosus            | kegg | 0.615823 | 0.540196 | kegg_pathway_198 |
| Rap1 signaling pathway                  | kegg | 0.614356 | 0.540989 | kegg_pathway_23  |
| Lysine degradation                      | kegg | 0.58181  | 0.558886 | kegg_pathway_265 |
| Ubiquitin mediated proteolysis          | kegg | 0.571641 | 0.564598 | kegg_pathway_38  |
| Apelin signaling pathway                | kegg | 0.571641 | 0.564598 | kegg_pathway_222 |
| Human T-cell leukemia virus 1 infection | kegg | 0.545232 | 0.579707 | kegg_pathway_170 |
| Basal cell carcinoma                    | kegg | 0.539927 | 0.582791 | kegg_pathway_186 |
| Arachidonic acid metabolism             | kegg | 0.539927 | 0.582791 | kegg_pathway_296 |
| Shigellosis                             | kegg | 0.53007  | 0.588564 | kegg_pathway_154 |
| MicroRNAs in cancer                     | kegg | 0.524122 | 0.592075 | kegg_pathway_178 |
| Central carbon metabolism in cancer     | kegg | 0.520443 | 0.594257 | kegg_pathway_193 |
| Retinol metabolism                      | kegg | 0.501846 | 0.605412 | kegg_pathway_316 |
| Phospholipase D signaling pathway       | kegg | 0.499368 | 0.606914 | kegg_pathway_207 |
| Gastric cancer                          | kegg | 0.493307 | 0.610604 | kegg_pathway_231 |
| Drug metabolism - cytochrome P450       | kegg | 0.492865 | 0.610874 | kegg_pathway_323 |
| Glycolysis / Gluconeogenesis            | kegg | 0.492865 | 0.610874 | kegg_pathway_240 |
| Renal cell carcinoma                    | kegg | 0.492865 | 0.610874 | kegg_pathway_180 |
| RIG-I-like receptor signaling pathway   | kegg | 0.475497 | 0.621576 | kegg_pathway_76  |

|                                                  |      |          |          |                  |
|--------------------------------------------------|------|----------|----------|------------------|
| B cell receptor signaling pathway                | kegg | 0.467101 | 0.626817 | kegg_pathway_82  |
| p53 signaling pathway                            | kegg | 0.458888 | 0.631986 | kegg_pathway_37  |
| Metabolism of xenobiotics by cytochrome P450     | kegg | 0.458888 | 0.631986 | kegg_pathway_322 |
| Adherens junction                                | kegg | 0.458888 | 0.631986 | kegg_pathway_66  |
| Bile secretion                                   | kegg | 0.458888 | 0.631986 | kegg_pathway_137 |
| Bacterial invasion of epithelial cells           | kegg | 0.450854 | 0.637084 | kegg_pathway_150 |
| Wnt signaling pathway                            | kegg | 0.447552 | 0.639191 | kegg_pathway_54  |
| Necroptosis                                      | kegg | 0.421264 | 0.656217 | kegg_pathway_226 |
| Complement and coagulation cascades              | kegg | 0.406111 | 0.666236 | kegg_pathway_70  |
| Chemical carcinogenesis                          | kegg | 0.392409 | 0.675428 | kegg_pathway_176 |
| Alzheimer disease                                | kegg | 0.377961 | 0.685257 | kegg_pathway_140 |
| Salmonella infection                             | kegg | 0.360504 | 0.697325 | kegg_pathway_155 |
| Insulin secretion                                | kegg | 0.360504 | 0.697325 | kegg_pathway_106 |
| Fc gamma R-mediated phagocytosis                 | kegg | 0.331623 | 0.717758 | kegg_pathway_84  |
| mRNA surveillance pathway                        | kegg | 0.331623 | 0.717758 | kegg_pathway_5   |
| Kaposi sarcoma-associated herpesvirus infection  | kegg | 0.315794 | 0.72921  | kegg_pathway_227 |
| Calcium signaling pathway                        | kegg | 0.308341 | 0.734665 | kegg_pathway_24  |
| Glycerophospholipid metabolism                   | kegg | 0.300455 | 0.740481 | kegg_pathway_294 |
| Progesterone-mediated oocyte maturation          | kegg | 0.295596 | 0.744088 | kegg_pathway_109 |
| Choline metabolism in cancer                     | kegg | 0.290827 | 0.747645 | kegg_pathway_194 |
| Inflammatory mediator regulation of TRP channels | kegg | 0.286146 | 0.751153 | kegg_pathway_103 |
| Ribosome biogenesis in eukaryotes                | kegg | 0.286146 | 0.751153 | kegg_pathway_2   |
| Focal adhesion                                   | kegg | 0.273688 | 0.760569 | kegg_pathway_63  |
| C-type lectin receptor signaling pathway         | kegg | 0.26826  | 0.764709 | kegg_pathway_236 |
| Carbon metabolism                                | kegg | 0.232445 | 0.792593 | kegg_pathway_327 |



|                                                          |      |          |          |                  |
|----------------------------------------------------------|------|----------|----------|------------------|
| Glutamatergic synapse                                    | kegg | 0.228808 | 0.795481 | kegg_pathway_94  |
| Thyroid hormone signaling pathway                        | kegg | 0.221721 | 0.801139 | kegg_pathway_114 |
| Sphingolipid signaling pathway                           | kegg | 0.21154  | 0.809337 | kegg_pathway_33  |
| Platelet activation                                      | kegg | 0.195696 | 0.822262 | kegg_pathway_71  |
| Cell cycle                                               | kegg | 0.195696 | 0.822262 | kegg_pathway_35  |
| Oocyte meiosis                                           | kegg | 0.192686 | 0.824741 | kegg_pathway_36  |
| Ras signaling pathway                                    | kegg | 0.184891 | 0.831195 | kegg_pathway_22  |
| Thermogenesis                                            | kegg | 0.184891 | 0.831195 | kegg_pathway_234 |
| Dopaminergic synapse                                     | kegg | 0.175651 | 0.838911 | kegg_pathway_98  |
| Human papillomavirus infection                           | kegg | 0.175419 | 0.839105 | kegg_pathway_229 |
| Vascular smooth muscle contraction                       | kegg | 0.172973 | 0.84116  | kegg_pathway_53  |
| Oxidative phosphorylation                                | kegg | 0.167751 | 0.845564 | kegg_pathway_255 |
| Apoptosis                                                | kegg | 0.162698 | 0.849848 | kegg_pathway_50  |
| Insulin signaling pathway                                | kegg | 0.160233 | 0.851945 | kegg_pathway_105 |
| Signaling pathways regulating pluripotency of stem cells | kegg | 0.155423 | 0.856053 | kegg_pathway_69  |
| Parkinson disease                                        | kegg | 0.148494 | 0.862005 | kegg_pathway_141 |
| Cell adhesion molecules (CAMs)                           | kegg | 0.146259 | 0.863934 | kegg_pathway_65  |
| Cushing syndrome                                         | kegg | 0.122054 | 0.885101 | kegg_pathway_235 |
| JAK-STAT signaling pathway                               | kegg | 0.108294 | 0.897364 | kegg_pathway_78  |
| Protein processing in endoplasmic reticulum              | kegg | 0.106691 | 0.898803 | kegg_pathway_42  |
| cGMP-PKG signaling pathway                               | kegg | 0.103561 | 0.901621 | kegg_pathway_25  |
| Influenza A                                              | kegg | 0.103561 | 0.901621 | kegg_pathway_169 |
| RNA transport                                            | kegg | 0.103561 | 0.901621 | kegg_pathway_4   |
| Hepatocellular carcinoma                                 | kegg | 0.102032 | 0.903001 | kegg_pathway_230 |

|                                          |      |           |          |                  |
|------------------------------------------|------|-----------|----------|------------------|
| Proteoglycans in cancer                  | kegg | 0.0618158 | 0.940056 | kegg_pathway_177 |
| Viral carcinogenesis                     | kegg | 0.0618158 | 0.940056 | kegg_pathway_175 |
| Human immunodeficiency virus 1 infection | kegg | 0.0541975 | 0.947245 | kegg_pathway_239 |
| Human cytomegalovirus infection          | kegg | 0.043557  | 0.957378 | kegg_pathway_238 |
| Herpes simplex virus 1 infection         | kegg | 0.0321142 | 0.968396 | kegg_pathway_171 |
| Metabolic pathways                       | kegg | 0.0163164 | 0.983816 | kegg_pathway_326 |
| MAPK signaling pathway                   | kegg | 0.015789  | 0.984335 | kegg_pathway_20  |

**Supplementary Table S4. The output result of pathway enrichment analysis by Partek Genomics Suite 7.0 based on the down-regultaed genes in PsA samples.** Enrichment -p-value was calculated based on hyper-geometric distribution.

| Pathway Name                                               | Enrichment |         | Pathway ID                  |
|------------------------------------------------------------|------------|---------|-----------------------------|
|                                                            | Database   | Score   |                             |
| Homologous recombination                                   | kegg       | 6.93223 | 0.000975825 kegg_pathway_17 |
| Protein processing in endoplasmic reticulum                | kegg       | 6.29289 | 0.00184941 kegg_pathway_42  |
| Apoptosis                                                  | kegg       | 4.60809 | 0.00997089 kegg_pathway_50  |
| Fanconi anemia pathway                                     | kegg       | 4.11426 | 0.0163381 kegg_pathway_19   |
| Salivary secretion                                         | kegg       | 4.08869 | 0.0167611 kegg_pathway_131  |
| Tryptophan metabolism                                      | kegg       | 3.93999 | 0.0194485 kegg_pathway_270  |
| RNA degradation                                            | kegg       | 3.93519 | 0.0195419 kegg_pathway_6    |
| Ubiquitin mediated proteolysis                             | kegg       | 3.7425  | 0.0236948 kegg_pathway_38   |
| Epithelial cell signaling in Helicobacter pylori infection | kegg       | 3.70887 | 0.0245052 kegg_pathway_152  |
| Apoptosis - multiple species                               | kegg       | 3.67429 | 0.0253673 kegg_pathway_211  |
| Peroxisome                                                 | kegg       | 3.64543 | 0.0261101 kegg_pathway_46   |
| RIG-I-like receptor signaling pathway                      | kegg       | 3.63157 | 0.0264746 kegg_pathway_76   |
| Basal transcription factors                                | kegg       | 3.62825 | 0.0265625 kegg_pathway_8    |
| Type II diabetes mellitus                                  | kegg       | 3.53113 | 0.0292717 kegg_pathway_121  |
| Nucleotide excision repair                                 | kegg       | 3.43715 | 0.0321563 kegg_pathway_15   |
| Longevity regulating pathway                               | kegg       | 3.25252 | 0.0386768 kegg_pathway_210  |
| NOD-like receptor signaling pathway                        | kegg       | 3.25014 | 0.0387687 kegg_pathway_75   |
| Hepatitis B                                                | kegg       | 3.15543 | 0.04262 kegg_pathway_167    |
| Shigellosis                                                | kegg       | 3.09963 | 0.0450657 kegg_pathway_154  |
| Synaptic vesicle cycle                                     | kegg       | 3.00979 | 0.0493022 kegg_pathway_91   |

|                                                     |      |         |                            |
|-----------------------------------------------------|------|---------|----------------------------|
| TNF signaling pathway                               | kegg | 2.88123 | 0.0560655 kegg_pathway_85  |
| Fc epsilon RI signaling pathway                     | kegg | 2.82667 | 0.0592098 kegg_pathway_83  |
| Legionellosis                                       | kegg | 2.78261 | 0.061877 kegg_pathway_157  |
| ErbB signaling pathway                              | kegg | 2.71416 | 0.0662605 kegg_pathway_21  |
| Fatty acid degradation                              | kegg | 2.60779 | 0.0736976 kegg_pathway_249 |
| Platinum drug resistance                            | kegg | 2.57953 | 0.0758099 kegg_pathway_214 |
| One carbon pool by folate                           | kegg | 2.52002 | 0.0804581 kegg_pathway_307 |
| Spliceosome                                         | kegg | 2.4805  | 0.083701 kegg_pathway_10   |
| RNA transport                                       | kegg | 2.46055 | 0.0853878 kegg_pathway_4   |
| AMPK signaling pathway                              | kegg | 2.41828 | 0.0890746 kegg_pathway_49  |
| Chronic myeloid leukemia                            | kegg | 2.35517 | 0.0948774 kegg_pathway_189 |
| Fc gamma R-mediated phagocytosis                    | kegg | 2.34966 | 0.0954013 kegg_pathway_84  |
| Notch signaling pathway                             | kegg | 2.31549 | 0.0987175 kegg_pathway_56  |
| Amino sugar and nucleotide sugar metabolism         | kegg | 2.31549 | 0.0987175 kegg_pathway_285 |
| Terpenoid backbone biosynthesis                     | kegg | 2.29354 | 0.100909 kegg_pathway_318  |
| Insulin resistance                                  | kegg | 2.27068 | 0.103242 kegg_pathway_122  |
| IL-17 signaling pathway                             | kegg | 2.25491 | 0.104883 kegg_pathway_220  |
| Ubiquinone and other terpenoid-quinone biosynthesis | kegg | 2.23678 | 0.106802 kegg_pathway_253  |
| Cellular senescence                                 | kegg | 2.1777  | 0.113302 kegg_pathway_228  |
| Osteoclast differentiation                          | kegg | 2.17575 | 0.113523 kegg_pathway_61   |
| Toxoplasmosis                                       | kegg | 2.14512 | 0.117054 kegg_pathway_162  |
| alpha-Linolenic acid metabolism                     | kegg | 2.00294 | 0.134938 kegg_pathway_298  |
| Breast cancer                                       | kegg | 2.00022 | 0.135306 kegg_pathway_216  |
| Phosphatidylinositol signaling system               | kegg | 1.99282 | 0.136311 kegg_pathway_32   |
| Biotin metabolism                                   | kegg | 1.92055 | 0.146527 kegg_pathway_313  |

|                                                     |      |         |                           |
|-----------------------------------------------------|------|---------|---------------------------|
| B cell receptor signaling pathway                   | kegg | 1.85071 | 0.157126 kegg_pathway_82  |
| Sphingolipid signaling pathway                      | kegg | 1.84198 | 0.158504 kegg_pathway_33  |
| Glycosaminoglycan biosynthesis - keratan sulfate    | kegg | 1.8327  | 0.159981 kegg_pathway_289 |
| Hippo signaling pathway                             | kegg | 1.80878 | 0.163854 kegg_pathway_62  |
| Toll-like receptor signaling pathway                | kegg | 1.76059 | 0.171943 kegg_pathway_74  |
| Collecting duct acid secretion                      | kegg | 1.75865 | 0.172277 kegg_pathway_130 |
| Metabolic pathways                                  | kegg | 1.75538 | 0.172842 kegg_pathway_326 |
| Porphyrin and chlorophyll metabolism                | kegg | 1.72437 | 0.178286 kegg_pathway_317 |
| Inositol phosphate metabolism                       | kegg | 1.71628 | 0.179734 kegg_pathway_292 |
| Th1 and Th2 cell differentiation                    | kegg | 1.71571 | 0.179836 kegg_pathway_218 |
| Herpes simplex virus 1 infection                    | kegg | 1.71163 | 0.180571 kegg_pathway_171 |
| VEGF signaling pathway                              | kegg | 1.6846  | 0.185518 kegg_pathway_60  |
| Pancreatic cancer                                   | kegg | 1.67373 | 0.187547 kegg_pathway_181 |
| Nicotinate and nicotinamide metabolism              | kegg | 1.61642 | 0.198608 kegg_pathway_311 |
| Cysteine and methionine metabolism                  | kegg | 1.5596  | 0.21022 kegg_pathway_262  |
| Antifolate resistance                               | kegg | 1.55062 | 0.212116 kegg_pathway_217 |
| Longevity regulating pathway - multiple species     | kegg | 1.54682 | 0.212923 kegg_pathway_209 |
| Endocrine resistance                                | kegg | 1.53205 | 0.216093 kegg_pathway_215 |
| Selenocompound metabolism                           | kegg | 1.52888 | 0.216778 kegg_pathway_275 |
| Autophagy - other                                   | kegg | 1.48803 | 0.225817 kegg_pathway_224 |
| Dopaminergic synapse                                | kegg | 1.46183 | 0.231811 kegg_pathway_98  |
| Phenylalanine, tyrosine and tryptophan biosynthesis | kegg | 1.46056 | 0.232106 kegg_pathway_271 |
| 2-Oxocarboxylic acid metabolism                     | kegg | 1.44343 | 0.236117 kegg_pathway_328 |
| Fructose and mannose metabolism                     | kegg | 1.42845 | 0.239681 kegg_pathway_244 |
| Ovarian steroidogenesis                             | kegg | 1.41217 | 0.243613 kegg_pathway_108 |

|                                                  |      |         |                           |
|--------------------------------------------------|------|---------|---------------------------|
| Pathways in cancer                               | kegg | 1.3864  | 0.249973 kegg_pathway_173 |
| HIF-1 signaling pathway                          | kegg | 1.36754 | 0.254734 kegg_pathway_30  |
| Inflammatory mediator regulation of TRP channels | kegg | 1.36754 | 0.254734 kegg_pathway_103 |
| Glycosaminoglycan degradation                    | kegg | 1.36436 | 0.255544 kegg_pathway_287 |
| MAPK signaling pathway                           | kegg | 1.35261 | 0.258564 kegg_pathway_20  |
| NF-kappa B signaling pathway                     | kegg | 1.33673 | 0.262702 kegg_pathway_29  |
| Vibrio cholerae infection                        | kegg | 1.32239 | 0.266497 kegg_pathway_151 |
| Neurotrophin signaling pathway                   | kegg | 1.31501 | 0.268472 kegg_pathway_92  |
| Vitamin B6 metabolism                            | kegg | 1.30332 | 0.271629 kegg_pathway_310 |
| Phosphonate and phosphinate metabolism           | kegg | 1.30332 | 0.271629 kegg_pathway_274 |
| MicroRNAs in cancer                              | kegg | 1.28294 | 0.277222 kegg_pathway_178 |
| Measles                                          | kegg | 1.275   | 0.279432 kegg_pathway_168 |
| Fluid shear stress and atherosclerosis           | kegg | 1.275   | 0.279432 kegg_pathway_221 |
| Colorectal cancer                                | kegg | 1.27008 | 0.280809 kegg_pathway_179 |
| Adipocytokine signaling pathway                  | kegg | 1.2691  | 0.281084 kegg_pathway_115 |
| Pyruvate metabolism                              | kegg | 1.26584 | 0.282001 kegg_pathway_303 |
| Wnt signaling pathway                            | kegg | 1.24345 | 0.288388 kegg_pathway_54  |
| Fatty acid metabolism                            | kegg | 1.23874 | 0.28975 kegg_pathway_329  |
| Aminoacyl-tRNA biosynthesis                      | kegg | 1.19904 | 0.301483 kegg_pathway_321 |
| p53 signaling pathway                            | kegg | 1.16622 | 0.311542 kegg_pathway_37  |
| Pathogenic Escherichia coli infection            | kegg | 1.1607  | 0.313268 kegg_pathway_153 |
| Glutathione metabolism                           | kegg | 1.1607  | 0.313268 kegg_pathway_278 |
| Other types of O-glycan biosynthesis             | kegg | 1.15907 | 0.313777 kegg_pathway_283 |
| mRNA surveillance pathway                        | kegg | 1.11994 | 0.326298 kegg_pathway_5   |
| Epstein-Barr virus infection                     | kegg | 1.09998 | 0.332879 kegg_pathway_172 |

|                                                        |      |          |                           |
|--------------------------------------------------------|------|----------|---------------------------|
| Mismatch repair                                        | kegg | 1.09958  | 0.33301 kegg_pathway_16   |
| Histidine metabolism                                   | kegg | 1.09958  | 0.33301 kegg_pathway_267  |
| Autophagy - animal                                     | kegg | 1.08683  | 0.337284 kegg_pathway_41  |
| Human papillomavirus infection                         | kegg | 1.07044  | 0.342859 kegg_pathway_229 |
| Small cell lung cancer                                 | kegg | 1.06483  | 0.344786 kegg_pathway_191 |
| Bladder cancer                                         | kegg | 1.03976  | 0.35354 kegg_pathway_188  |
| Fat digestion and absorption                           | kegg | 1.03976  | 0.35354 kegg_pathway_136  |
| Hepatocellular carcinoma                               | kegg | 1.03116  | 0.356593 kegg_pathway_230 |
| Non-alcoholic fatty liver disease (NAFLD)              | kegg | 1.02484  | 0.358855 kegg_pathway_123 |
| Lysine degradation                                     | kegg | 1.01972  | 0.360697 kegg_pathway_265 |
| Kaposi sarcoma-associated herpesvirus infection        | kegg | 1.01952  | 0.360769 kegg_pathway_227 |
| FoxO signaling pathway                                 | kegg | 1.01927  | 0.360859 kegg_pathway_31  |
| Endocytosis                                            | kegg | 0.995361 | 0.36959 kegg_pathway_44   |
| Calcium signaling pathway                              | kegg | 0.983422 | 0.374029 kegg_pathway_24  |
| Sulfur metabolism                                      | kegg | 0.971719 | 0.378432 kegg_pathway_320 |
| Long-term depression                                   | kegg | 0.956014 | 0.384422 kegg_pathway_99  |
| Glycosylphosphatidylinositol (GPI)-anchor biosynthesis | kegg | 0.942568 | 0.389626 kegg_pathway_293 |
| Pancreatic secretion                                   | kegg | 0.938196 | 0.391333 kegg_pathway_133 |
| Choline metabolism in cancer                           | kegg | 0.914655 | 0.400655 kegg_pathway_194 |
| Hepatitis C                                            | kegg | 0.907861 | 0.403386 kegg_pathway_166 |
| Biosynthesis of unsaturated fatty acids                | kegg | 0.896402 | 0.408035 kegg_pathway_325 |
| Arachidonic acid metabolism                            | kegg | 0.89639  | 0.40804 kegg_pathway_296  |
| Cytosolic DNA-sensing pathway                          | kegg | 0.89639  | 0.40804 kegg_pathway_77   |
| Ribosome biogenesis in eukaryotes                      | kegg | 0.891674 | 0.409969 kegg_pathway_2   |
| ABC transporters                                       | kegg | 0.891057 | 0.410222 kegg_pathway_1   |

|                                            |      |          |                           |
|--------------------------------------------|------|----------|---------------------------|
| Synthesis and degradation of ketone bodies | kegg | 0.890523 | 0.410441 kegg_pathway_250 |
| Chagas disease (American trypanosomiasis)  | kegg | 0.825961 | 0.437814 kegg_pathway_159 |
| Ether lipid metabolism                     | kegg | 0.825504 | 0.438014 kegg_pathway_295 |
| Taurine and hypotaurine metabolism         | kegg | 0.819153 | 0.440805 kegg_pathway_273 |
| Non-small cell lung cancer                 | kegg | 0.813958 | 0.443101 kegg_pathway_192 |
| Acute myeloid leukemia                     | kegg | 0.813958 | 0.443101 kegg_pathway_190 |
| C-type lectin receptor signaling pathway   | kegg | 0.805092 | 0.447047 kegg_pathway_236 |
| Valine, leucine and isoleucine degradation | kegg | 0.794682 | 0.451725 kegg_pathway_263 |
| Necroptosis                                | kegg | 0.786546 | 0.455415 kegg_pathway_226 |
| Salmonella infection                       | kegg | 0.785574 | 0.455858 kegg_pathway_155 |
| Cell cycle                                 | kegg | 0.784824 | 0.4562 kegg_pathway_35    |
| Circadian rhythm                           | kegg | 0.773187 | 0.46154 kegg_pathway_88   |
| Citrate cycle (TCA cycle)                  | kegg | 0.773187 | 0.46154 kegg_pathway_241  |
| Glyoxylate and dicarboxylate metabolism    | kegg | 0.773187 | 0.46154 kegg_pathway_304  |
| Cocaine addiction                          | kegg | 0.765077 | 0.465298 kegg_pathway_145 |
| Th17 cell differentiation                  | kegg | 0.764828 | 0.465414 kegg_pathway_219 |
| Adrenergic signaling in cardiomyocytes     | kegg | 0.751645 | 0.47159 kegg_pathway_52   |
| Gap junction                               | kegg | 0.742228 | 0.476052 kegg_pathway_68  |
| Arginine and proline metabolism            | kegg | 0.736637 | 0.478721 kegg_pathway_266 |
| N-Glycan biosynthesis                      | kegg | 0.736637 | 0.478721 kegg_pathway_280 |
| Cholesterol metabolism                     | kegg | 0.736637 | 0.478721 kegg_pathway_232 |
| RNA polymerase                             | kegg | 0.736593 | 0.478742 kegg_pathway_7   |
| Mucin type O-glycan biosynthesis           | kegg | 0.736593 | 0.478742 kegg_pathway_282 |
| GABAergic synapse                          | kegg | 0.721427 | 0.486058 kegg_pathway_97  |
| Human cytomegalovirus infection            | kegg | 0.71022  | 0.491536 kegg_pathway_238 |



|                                                           |      |          |                           |
|-----------------------------------------------------------|------|----------|---------------------------|
| Endocrine and other factor-regulated calcium reabsorption | kegg | 0.709307 | 0.491985 kegg_pathway_127 |
| Antigen processing and presentation                       | kegg | 0.693141 | 0.500003 kegg_pathway_72  |
| Gastric cancer                                            | kegg | 0.687833 | 0.502664 kegg_pathway_231 |
| Morphine addiction                                        | kegg | 0.681491 | 0.505862 kegg_pathway_147 |
| Leishmaniasis                                             | kegg | 0.671212 | 0.511089 kegg_pathway_158 |
| Tight junction                                            | kegg | 0.665686 | 0.513921 kegg_pathway_67  |
| TGF-beta signaling pathway                                | kegg | 0.662325 | 0.515651 kegg_pathway_58  |
| Human immunodeficiency virus 1 infection                  | kegg | 0.653757 | 0.520088 kegg_pathway_239 |
| PPAR signaling pathway                                    | kegg | 0.649967 | 0.522063 kegg_pathway_13  |
| GnRH signaling pathway                                    | kegg | 0.643672 | 0.52536 kegg_pathway_107  |
| mTOR signaling pathway                                    | kegg | 0.643207 | 0.525604 kegg_pathway_47  |
| Thermogenesis                                             | kegg | 0.636756 | 0.529006 kegg_pathway_234 |
| Regulation of actin cytoskeleton                          | kegg | 0.617244 | 0.539429 kegg_pathway_104 |
| Thyroid hormone signaling pathway                         | kegg | 0.590192 | 0.554221 kegg_pathway_114 |
| Tyrosine metabolism                                       | kegg | 0.580771 | 0.559467 kegg_pathway_268 |
| Estrogen signaling pathway                                | kegg | 0.57503  | 0.562688 kegg_pathway_110 |
| Insulin signaling pathway                                 | kegg | 0.57503  | 0.562688 kegg_pathway_105 |
| Glycerophospholipid metabolism                            | kegg | 0.573938 | 0.563303 kegg_pathway_294 |
| Pertussis                                                 | kegg | 0.571411 | 0.564728 kegg_pathway_156 |
| Tuberculosis                                              | kegg | 0.561524 | 0.570339 kegg_pathway_165 |
| Human T-cell leukemia virus 1 infection                   | kegg | 0.560293 | 0.571042 kegg_pathway_170 |
| Aldosterone-regulated sodium reabsorption                 | kegg | 0.554243 | 0.574507 kegg_pathway_126 |
| African trypanosomiasis                                   | kegg | 0.554243 | 0.574507 kegg_pathway_160 |
| Thyroid cancer                                            | kegg | 0.554243 | 0.574507 kegg_pathway_185 |
| Signaling pathways regulating pluripotency of stem cells  | kegg | 0.547726 | 0.578263 kegg_pathway_69  |

|                                                                         |      |          |                           |
|-------------------------------------------------------------------------|------|----------|---------------------------|
| Endometrial cancer                                                      | kegg | 0.545198 | 0.579727 kegg_pathway_182 |
| EGFR tyrosine kinase inhibitor resistance                               | kegg | 0.535696 | 0.585262 kegg_pathway_213 |
| AGE-RAGE signaling pathway in diabetic complications                    | kegg | 0.526396 | 0.59073 kegg_pathway_208  |
| T cell receptor signaling pathway                                       | kegg | 0.526396 | 0.59073 kegg_pathway_81   |
| Nitrogen metabolism                                                     | kegg | 0.522753 | 0.592886 kegg_pathway_319 |
| Fatty acid biosynthesis                                                 | kegg | 0.522753 | 0.592886 kegg_pathway_247 |
| Phenylalanine metabolism                                                | kegg | 0.522753 | 0.592886 kegg_pathway_269 |
| Lysosome                                                                | kegg | 0.490775 | 0.612152 kegg_pathway_43  |
| Taste transduction                                                      | kegg | 0.486156 | 0.614986 kegg_pathway_101 |
| Nicotine addiction                                                      | kegg | 0.482301 | 0.617361 kegg_pathway_148 |
| Transcriptional misregulation in cancer                                 | kegg | 0.471985 | 0.623763 kegg_pathway_174 |
| Basal cell carcinoma                                                    | kegg | 0.452181 | 0.636239 kegg_pathway_186 |
| Retrograde endocannabinoid signaling                                    | kegg | 0.438781 | 0.644822 kegg_pathway_93  |
| Inflammatory bowel disease (IBD)                                        | kegg | 0.435588 | 0.646884 kegg_pathway_197 |
| Ras signaling pathway                                                   | kegg | 0.432913 | 0.648617 kegg_pathway_22  |
| Glycosaminoglycan biosynthesis - chondroitin sulfate / dermatan sulfate | kegg | 0.426696 | 0.652662 kegg_pathway_288 |
| Purine metabolism                                                       | kegg | 0.418067 | 0.658318 kegg_pathway_257 |
| Arginine biosynthesis                                                   | kegg | 0.399621 | 0.670574 kegg_pathway_256 |
| Retinol metabolism                                                      | kegg | 0.389368 | 0.677485 kegg_pathway_316 |
| Glycolysis / Gluconeogenesis                                            | kegg | 0.375072 | 0.68724 kegg_pathway_240  |
| Amphetamine addiction                                                   | kegg | 0.375072 | 0.68724 kegg_pathway_146  |
| Rheumatoid arthritis                                                    | kegg | 0.374689 | 0.687503 kegg_pathway_199 |
| Leukocyte transendothelial migration                                    | kegg | 0.370749 | 0.690217 kegg_pathway_86  |
| Proteasome                                                              | kegg | 0.366766 | 0.692972 kegg_pathway_11  |

|                                              |      |          |                           |
|----------------------------------------------|------|----------|---------------------------|
| Hedgehog signaling pathway                   | kegg | 0.366766 | 0.692972 kegg_pathway_57  |
| Oxidative phosphorylation                    | kegg | 0.365161 | 0.694085 kegg_pathway_255 |
| Carbon metabolism                            | kegg | 0.359943 | 0.697716 kegg_pathway_327 |
| Proximal tubule bicarbonate reclamation      | kegg | 0.35143  | 0.703681 kegg_pathway_129 |
| Mannose type O-glycan biosynthesis           | kegg | 0.35143  | 0.703681 kegg_pathway_284 |
| Sphingolipid metabolism                      | kegg | 0.350547 | 0.704303 kegg_pathway_299 |
| Glutamatergic synapse                        | kegg | 0.34943  | 0.70509 kegg_pathway_94   |
| Prolactin signaling pathway                  | kegg | 0.34802  | 0.706085 kegg_pathway_112 |
| Axon guidance                                | kegg | 0.327482 | 0.720736 kegg_pathway_59  |
| Adherens junction                            | kegg | 0.322895 | 0.72405 kegg_pathway_66   |
| Melanoma                                     | kegg | 0.322895 | 0.72405 kegg_pathway_187  |
| Metabolism of xenobiotics by cytochrome P450 | kegg | 0.322895 | 0.72405 kegg_pathway_322  |
| Rap1 signaling pathway                       | kegg | 0.30065  | 0.740337 kegg_pathway_23  |
| Thyroid hormone synthesis                    | kegg | 0.299555 | 0.741148 kegg_pathway_113 |
| Biosynthesis of amino acids                  | kegg | 0.299555 | 0.741148 kegg_pathway_330 |
| Amyotrophic lateral sclerosis (ALS)          | kegg | 0.292772 | 0.746192 kegg_pathway_142 |
| Maturity onset diabetes of the young         | kegg | 0.291394 | 0.747221 kegg_pathway_125 |
| Folate biosynthesis                          | kegg | 0.291394 | 0.747221 kegg_pathway_315 |
| Renin-angiotensin system                     | kegg | 0.291394 | 0.747221 kegg_pathway_73  |
| Gastric acid secretion                       | kegg | 0.288513 | 0.749377 kegg_pathway_132 |
| Glioma                                       | kegg | 0.288513 | 0.749377 kegg_pathway_183 |
| Prostate cancer                              | kegg | 0.287894 | 0.749841 kegg_pathway_184 |
| Aldosterone synthesis and secretion          | kegg | 0.287894 | 0.749841 kegg_pathway_120 |
| Progesterone-mediated oocyte maturation      | kegg | 0.287894 | 0.749841 kegg_pathway_109 |
| Ascorbate and aldarate metabolism            | kegg | 0.274086 | 0.760267 kegg_pathway_246 |

|                                                            |      |          |                           |
|------------------------------------------------------------|------|----------|---------------------------|
| Glycosphingolipid biosynthesis - lacto and neolacto series | kegg | 0.274086 | 0.760267 kegg_pathway_300 |
| Olfactory transduction                                     | kegg | 0.271309 | 0.762381 kegg_pathway_100 |
| Platelet activation                                        | kegg | 0.258868 | 0.771925 kegg_pathway_71  |
| Phototransduction                                          | kegg | 0.257942 | 0.77264 kegg_pathway_102  |
| Butanoate metabolism                                       | kegg | 0.257942 | 0.77264 kegg_pathway_306  |
| Hippo signaling pathway - multiple species                 | kegg | 0.257942 | 0.77264 kegg_pathway_212  |
| Regulation of lipolysis in adipocytes                      | kegg | 0.244759 | 0.782893 kegg_pathway_118 |
| Linoleic acid metabolism                                   | kegg | 0.242866 | 0.784377 kegg_pathway_297 |
| Asthma                                                     | kegg | 0.242866 | 0.784377 kegg_pathway_195 |
| Phagosome                                                  | kegg | 0.227651 | 0.796402 kegg_pathway_45  |
| Pyrimidine metabolism                                      | kegg | 0.223846 | 0.799438 kegg_pathway_259 |
| beta-Alanine metabolism                                    | kegg | 0.215586 | 0.806069 kegg_pathway_272 |
| Propanoate metabolism                                      | kegg | 0.203238 | 0.816084 kegg_pathway_305 |
| Cushing syndrome                                           | kegg | 0.203093 | 0.816202 kegg_pathway_235 |
| Proteoglycans in cancer                                    | kegg | 0.199226 | 0.819365 kegg_pathway_177 |
| Insulin secretion                                          | kegg | 0.190397 | 0.826631 kegg_pathway_106 |
| Glycerolipid metabolism                                    | kegg | 0.187282 | 0.82921 kegg_pathway_291  |
| SNARE interactions in vesicular transport                  | kegg | 0.180812 | 0.834592 kegg_pathway_40  |
| Cholinergic synapse                                        | kegg | 0.179876 | 0.835374 kegg_pathway_95  |
| Serotonergic synapse                                       | kegg | 0.179876 | 0.835374 kegg_pathway_96  |
| Prion diseases                                             | kegg | 0.170626 | 0.843137 kegg_pathway_144 |
| JAK-STAT signaling pathway                                 | kegg | 0.161066 | 0.851236 kegg_pathway_78  |
| Starch and sucrose metabolism                              | kegg | 0.161059 | 0.851242 kegg_pathway_279 |
| DNA replication                                            | kegg | 0.161059 | 0.851242 kegg_pathway_9   |
| Alanine, aspartate and glutamate metabolism                | kegg | 0.161059 | 0.851242 kegg_pathway_260 |

|                                                     |      |           |                           |
|-----------------------------------------------------|------|-----------|---------------------------|
| Central carbon metabolism in cancer                 | kegg | 0.156715  | 0.854948 kegg_pathway_193 |
| Cortisol synthesis and secretion                    | kegg | 0.156715  | 0.854948 kegg_pathway_233 |
| cAMP signaling pathway                              | kegg | 0.149778  | 0.860899 kegg_pathway_26  |
| cGMP-PKG signaling pathway                          | kegg | 0.14747   | 0.862888 kegg_pathway_25  |
| Influenza A                                         | kegg | 0.14747   | 0.862888 kegg_pathway_169 |
| Drug metabolism - cytochrome P450                   | kegg | 0.137108  | 0.871876 kegg_pathway_323 |
| Huntington disease                                  | kegg | 0.133547  | 0.874986 kegg_pathway_143 |
| Renin secretion                                     | kegg | 0.131131  | 0.877103 kegg_pathway_119 |
| PI3K-Akt signaling pathway                          | kegg | 0.127908  | 0.879934 kegg_pathway_48  |
| Phospholipase D signaling pathway                   | kegg | 0.122416  | 0.88478 kegg_pathway_207  |
| Type I diabetes mellitus                            | kegg | 0.121137  | 0.885913 kegg_pathway_124 |
| Bile secretion                                      | kegg | 0.114707  | 0.891627 kegg_pathway_137 |
| Bacterial invasion of epithelial cells              | kegg | 0.109699  | 0.896104 kegg_pathway_150 |
| Viral carcinogenesis                                | kegg | 0.10644   | 0.899029 kegg_pathway_175 |
| Neuroactive ligand-receptor interaction             | kegg | 0.10624   | 0.899209 kegg_pathway_34  |
| Glucagon signaling pathway                          | kegg | 0.102873  | 0.902242 kegg_pathway_117 |
| Carbohydrate digestion and absorption               | kegg | 0.102349  | 0.902714 kegg_pathway_134 |
| Vasopressin-regulated water reabsorption            | kegg | 0.102349  | 0.902714 kegg_pathway_128 |
| Relaxin signaling pathway                           | kegg | 0.0963105 | 0.908182 kegg_pathway_55  |
| Vascular smooth muscle contraction                  | kegg | 0.089719  | 0.914188 kegg_pathway_53  |
| Parathyroid hormone synthesis, secretion and action | kegg | 0.0879824 | 0.915777 kegg_pathway_237 |
| Drug metabolism - other enzymes                     | kegg | 0.0877204 | 0.916017 kegg_pathway_324 |
| Chemical carcinogenesis                             | kegg | 0.0766813 | 0.926185 kegg_pathway_176 |
| Mineral absorption                                  | kegg | 0.069423  | 0.932932 kegg_pathway_139 |
| Parkinson disease                                   | kegg | 0.0626555 | 0.939267 kegg_pathway_141 |

|                                           |      |             |                           |
|-------------------------------------------|------|-------------|---------------------------|
| Alzheimer disease                         | kegg | 0.0573008   | 0.94431 kegg_pathway_140  |
| Viral myocarditis                         | kegg | 0.0499742   | 0.951254 kegg_pathway_206 |
| Ribosome                                  | kegg | 0.0450612   | 0.955939 kegg_pathway_3   |
| Steroid hormone biosynthesis              | kegg | 0.042441    | 0.958447 kegg_pathway_254 |
| Oxytocin signaling pathway                | kegg | 0.0418433   | 0.95902 kegg_pathway_116  |
| Oocyte meiosis                            | kegg | 0.0412606   | 0.959579 kegg_pathway_36  |
| Amoebiasis                                | kegg | 0.0389415   | 0.961807 kegg_pathway_163 |
| Natural killer cell mediated cytotoxicity | kegg | 0.0380456   | 0.962669 kegg_pathway_80  |
| Circadian entrainment                     | kegg | 0.0372087   | 0.963475 kegg_pathway_89  |
| Mitophagy - animal                        | kegg | 0.03236     | 0.968158 kegg_pathway_223 |
| Melanogenesis                             | kegg | 0.0310016   | 0.969474 kegg_pathway_111 |
| Staphylococcus aureus infection           | kegg | 0.0306551   | 0.96981 kegg_pathway_164  |
| Long-term potentiation                    | kegg | 0.0290417   | 0.971376 kegg_pathway_90  |
| Renal cell carcinoma                      | kegg | 0.0275141   | 0.972861 kegg_pathway_180 |
| Apelin signaling pathway                  | kegg | 0.0252563   | 0.97506 kegg_pathway_222  |
| Focal adhesion                            | kegg | 0.022307    | 0.97794 kegg_pathway_63   |
| Cell adhesion molecules (CAMs)            | kegg | 0.0196886   | 0.980504 kegg_pathway_65  |
| Complement and coagulation cascades       | kegg | 0.0152111   | 0.984904 kegg_pathway_70  |
| Hypertrophic cardiomyopathy (HCM)         | kegg | 0.0110195   | 0.989041 kegg_pathway_203 |
| Chemokine signaling pathway               | kegg | 0.0100837   | 0.989967 kegg_pathway_28  |
| Dilated cardiomyopathy (DCM)              | kegg | 0.0079858   | 0.992046 kegg_pathway_205 |
| Alcoholism                                | kegg | 0.00403613  | 0.995972 kegg_pathway_149 |
| Cytokine-cytokine receptor interaction    | kegg | 0.00177357  | 0.998228 kegg_pathway_27  |
| Systemic lupus erythematosus              | kegg | 0.000933436 | 0.999067 kegg_pathway_198 |

**Supplementary Table S5. The down-regulated genes involved in apoptosis pathway.**

| Gene Symbol | Function  | p-value(PsA vs. HC) | Ratio(PsA vs. HC) | Fold-Change(PsA vs. HC) |
|-------------|-----------|---------------------|-------------------|-------------------------|
| ATM         | Apoptosis | 0.0182896           | 0.84475           | Down-regulated in PsA   |
| NFKB1       | Apoptosis | 0.00639143          | 0.777525          | Down-regulated in PsA   |
| BIRC2       | Apoptosis | 0.00755812          | 0.738397          | Down-regulated in PsA   |
| IKBKB       | Apoptosis | 0.0471825           | 0.646689          | Down-regulated in PsA   |
| TUBA8       | Apoptosis | 0.0227001           | 0.903879          | Down-regulated in PsA   |
| CAPN1       | Apoptosis | 0.0447247           | 0.935332          | Down-regulated in PsA   |
| CASP10      | Apoptosis | 0.0156491           | 0.815481          | Down-regulated in PsA   |
| CASP7       | Apoptosis | 0.00662208          | 0.918258          | Down-regulated in PsA   |
| CTSL        | Apoptosis | 0.0217646           | 0.601047          | Down-regulated in PsA   |
| CTSD        | Apoptosis | 0.0107855           | 0.919197          | Down-regulated in PsA   |
| MAPK10      | Apoptosis | 0.00752709          | 0.935478          | Down-regulated in PsA   |
| HRK         | Apoptosis | 0.0448435           | 0.910863          | Down-regulated in PsA   |
| FADD        | Apoptosis | 0.00357763          | 0.803587          | Down-regulated in PsA   |
| DFFA        | Apoptosis | 0.0418897           | 0.703108          | Down-regulated in PsA   |
